# Supplementary material
Source: publisher figshare collection journal article supplement (https://diabetesjournals.figshare.com/ndownloader/files/27508085)
Supplement: Supplementary file 1 [file 27508085]

## Sheet: Sheet1
footprint	observed_tc_in_peak_in_all_enhancer	expected_tc_in_peak_in_all_enhancer	fold_tc_in_peak_in_all_enhancer	pvalue_tc_in_peak_in_all_enhancer	observed_tc_in_peak_in_all_promoter	expected_tc_in_peak_in_all_promoter	fold_tc_in_peak_in_all_promoter	pvalue_tc_in_peak_in_all_promoter	significance
AFP_1	44	26.9945	1.6075	0.2092	451	1747.08	0.2586	0.0001	None significant
AHR_1	217	295.577	0.7351	0.1319	38582	18658.9	2.0677	0.0001	Only significant in TCs in accessible promoters
AHR_2	99	91.6905	1.0789	0.4118	15791	5822.5	2.7118	0.0001	Only significant in TCs in accessible promoters
AHR__ARNT_1	175	101.313	1.7202	0.0374	12213	6321.53	1.9318	0.0001	Only significant in TCs in accessible promoters
AHR__ARNT_2	160	257.918	0.6218	0.066	37318	16593.4	2.2489	0.0001	Only significant in TCs in accessible promoters
AIRE_1	52	82.0436	0.6382	0.3096	2552	5220.34	0.489	0.0001	None significant
AIRE_2	25	60.3306	0.4239	0.2336	1415	3705.05	0.3821	0.0001	None significant
ALX1_1	54	30.2652	1.7591	0.1854	406	1855.26	0.2193	0.0001	None significant
ALX1_2	18	23.9833	0.7605	0.5318	484	1598.39	0.3032	0.0001	None significant
ALX1_3	18	20.9268	0.8665	0.6099	231	1347.33	0.1721	0.0001	None significant
ALX1_4	20	16.574	1.1949	0.4441	414	1074.23	0.386	0.0001	None significant
ALX1_5	13	16.3045	0.809	0.5952	120	990.442	0.122	0.0001	None significant
ALX1_6	39	20.6745	1.8455	0.1814	209	1346.78	0.1558	0.0001	None significant
ALX3_1	0	23.1972	0.0413	0.2337	251	1532.67	0.1643	0.0001	None significant
ALX3_2	30	16.6516	1.7562	0.2263	430	1102.35	0.3906	0.0001	None significant
ALX3_3	30	18.9634	1.5528	0.2633	487	1172.94	0.4157	0.0001	None significant
ALX3_4	13	15.9393	0.8265	0.5914	118	999.554	0.1189	0.0001	None significant
ALX4_1	79	54.6116	1.4385	0.1509	2096	3657.28	0.5732	0.0001	None significant
ALX4_2	18	25.0943	0.7281	0.5157	432	1535.75	0.2818	0.0001	None significant
ALX4_3	13	17.6277	0.7516	0.5591	146	1094.11	0.1342	0.0001	None significant
ALX4_4	13	16.2706	0.8106	0.6089	131	1056.04	0.1249	0.0001	None significant
AP1_known1	247	121.996	2.0163	0.0001	6132	7821.83	0.784	0.0001	Only significant in TCs in accessible enhancers
AP1_known10	197	85.5975	2.2864	0.0001	1301	5428.6	0.2398	0.0001	Only significant in TCs in accessible enhancers
AP1_known2	269	117.793	2.2729	0.0001	5129	7618.48	0.6733	0.0001	Only significant in TCs in accessible enhancers
AP1_known3	385	171.028	2.2438	0.0001	5815	10941.9	0.5315	0.0001	Only significant in TCs in accessible enhancers
AP1_known4	271	138.634	1.948	0.0029	5049	8759.34	0.5765	0.0001	None significant
AP1_known5	250	108.694	2.2882	0.0001	1801	6983.05	0.258	0.0001	Only significant in TCs in accessible enhancers
AP1_known6	452	210.418	2.1427	0.0001	7290	13619.6	0.5353	0.0001	Only significant in TCs in accessible enhancers
AP1_known7	292	154.903	1.8794	0.0001	6262	9799.75	0.639	0.0001	Only significant in TCs in accessible enhancers
AP1_known8	288	134.956	2.1257	0.0001	3082	8495.15	0.3629	0.0001	Only significant in TCs in accessible enhancers
AP1_known9	257	111.016	2.3032	0.0001	2486	7161.54	0.3472	0.0001	Only significant in TCs in accessible enhancers
AP3_1	8	10.793	0.7632	0.5986	306	710.477	0.4315	0.0001	None significant
ARHGEF12_1	0	9.8425	0.0922	0.5002	1001	654.098	1.5295	0.0001	Only significant in TCs in accessible promoters
ARID3A_2	51	29.5212	1.7037	0.2012	590	1883.32	0.3136	0.0001	None significant
ARID5A_1	0	21.9236	0.0436	0.1965	276	1457.08	0.19	0.0001	None significant
ARID5B_1	0	41.0884	0.0238	0.0375	1505	2519.09	0.5976	0.0001	None significant
ARNTL_1	47	40.4809	1.1572	0.3907	4556	2547.08	1.7884	0.0001	Only significant in TCs in accessible promoters
ARNT_1	110	91.801	1.1961	0.3087	10899	5865.2	1.8581	0.0001	Only significant in TCs in accessible promoters
ARNT_2	62	92.3189	0.6751	0.2695	11197	5914.74	1.8929	0.0001	Only significant in TCs in accessible promoters
ARX_1	17	22.6141	0.7623	0.48	423	1414.26	0.2996	0.0001	None significant
ARX_2	0	15.3461	0.0612	0.2702	120	965.765	0.1252	0.0001	None significant
ARX_3	13	15.7461	0.836	0.6129	107	974.629	0.1107	0.0001	None significant
ASCL2_2	261	198.404	1.3139	0.081	12396	12628.5	0.9816	0.2678	None significant
ATF2_1	8	6.8549	1.1458	0.5607	1680	457.561	3.6658	0.0001	Only significant in TCs in accessible promoters
ATF2_2	85	45.9487	1.8318	0.069	8327	2907.32	2.8635	0.0001	Only significant in TCs in accessible promoters
ATF2_3	24	16.5931	1.421	0.328	2994	1026.45	2.915	0.0001	Only significant in TCs in accessible promoters
ATF3_known1	100	63.4922	1.5661	0.1118	12455	4041.35	3.0814	0.0001	Only significant in TCs in accessible promoters
ATF3_known10	44	52.5978	0.8396	0.4291	5348	3313.67	1.6137	0.0001	Only significant in TCs in accessible promoters
ATF3_known12	199	84.9933	2.3258	0.0014	15211	5465.79	2.7826	0.0001	Only significant in TCs in accessible promoters
ATF3_known13	61	48.6561	1.2486	0.2693	9316	3147.55	2.9591	0.0001	Only significant in TCs in accessible promoters
ATF3_known14	37	28.0069	1.31	0.2911	6201	1786.89	3.4689	0.0001	Only significant in TCs in accessible promoters
ATF3_known15	80	28.9639	2.7033	0.0045	3743	1834.16	2.0402	0.0001	Only significant in TCs in accessible promoters
ATF3_known16	81	52.2582	1.5397	0.1497	7814	3348.42	2.3332	0.0001	Only significant in TCs in accessible promoters
ATF3_known2	24	13.8893	1.6791	0.238	3087	915.182	3.3705	0.0001	Only significant in TCs in accessible promoters
ATF3_known3	86	62.5349	1.3693	0.1945	11129	3972.72	2.8009	0.0001	Only significant in TCs in accessible promoters
ATF3_known4	83	113.788	0.7318	0.2243	18635	7239.82	2.5737	0.0001	Only significant in TCs in accessible promoters
ATF3_known5	202	137.445	1.4663	0.092	11758	8767.68	1.341	0.0001	Only significant in TCs in accessible promoters
ATF3_known6	97	53.8617	1.7863	0.0509	9835	3394.73	2.8966	0.0001	Only significant in TCs in accessible promoters
ATF3_known7	97	52.664	1.8262	0.048	10026	3364.35	2.9795	0.0001	Only significant in TCs in accessible promoters
ATF3_known8	26	28.3982	0.9184	0.567	5138	1789.5	2.8701	0.0001	Only significant in TCs in accessible promoters
ATF3_known9	196	128.359	1.5229	0.0597	13388	8178.64	1.6369	0.0001	Only significant in TCs in accessible promoters
ATF4_1	132	108.585	1.2137	0.259	11693	6791.08	1.7217	0.0001	Only significant in TCs in accessible promoters
ATF4_2	79	46.3304	1.6902	0.0798	2813	2942.43	0.956	0.2336	None significant
ATF4_3	58	49.363	1.1715	0.3317	2491	3080.01	0.8088	0.0001	None significant
ATF6_1	16	20.6584	0.7849	0.4894	3432	1318.06	2.6026	0.0001	Only significant in TCs in accessible promoters
ATF7_1	102	34.6741	2.8872	0.0059	4743	2267.86	2.0909	0.0001	Only significant in TCs in accessible promoters
BACH1_1	455	195.083	2.3256	0.0001	4781	12728	0.3757	0.0001	Only significant in TCs in accessible enhancers
BACH2_1	364	142.807	2.5381	0.0001	6407	9144.1	0.7007	0.0001	Only significant in TCs in accessible enhancers
BARHL1_1	96	39.8861	2.3724	0.0209	696	2473.56	0.2817	0.0001	None significant
BARHL1_2	10	11.7745	0.8611	0.6445	776	762.796	1.0173	0.4187	None significant
BARHL1_3	77	29.9484	2.5203	0.0089	891	1894.26	0.4706	0.0001	None significant
BARHL1_4	0	26.1298	0.0369	0.1628	484	1561.72	0.3104	0.0001	None significant
BARHL2_1	112	40.5301	2.7209	0.0045	568	2450.95	0.2321	0.0001	None significant
BARHL2_2	10	10.6603	0.9434	0.682	540	634.876	0.8508	0.0915	None significant
BARHL2_3	67	26.2864	2.4921	0.0149	616	1691.17	0.3646	0.0001	None significant
BARHL2_4	0	25.9291	0.0371	0.1646	439	1640.29	0.2681	0.0001	None significant
BARHL2_5	10	10.4743	0.9587	0.6943	550	705.222	0.7802	0.0342	None significant
BARHL2_6	67	25.9259	2.5254	0.0193	604	1662.43	0.3637	0.0001	None significant
BARHL2_7	16	25.727	0.6361	0.4745	400	1568.49	0.2555	0.0001	None significant
BARX1_1	100	33.3051	2.9442	0.0044	694	2108.35	0.3295	0.0001	None significant
BARX1_2	17	29.7623	0.5851	0.419	400	1956.33	0.2049	0.0001	None significant
BARX1_3	24	17.7062	1.3365	0.3551	544	1156.23	0.471	0.0001	None significant
BARX2_1	50	27.1365	1.8126	0.16	337	1664.15	0.203	0.0001	None significant
BATF_known1	99	43.8427	2.23	0.0225	4353	2716.62	1.6021	0.0001	Only significant in TCs in accessible promoters
BBX_1	60	34.5758	1.7146	0.1459	408	2271.58	0.18	0.0001	None significant
BCL6B_1	17	56.8219	0.3113	0.0981	2532	3699.35	0.6845	0.0001	None significant
BHLHA15_1	10	16.1149	0.6427	0.4867	287	1047.28	0.2747	0.0001	None significant
BHLHE22_1	0	19.264	0.0493	0.1575	131	1125.93	0.1171	0.0001	None significant
BHLHE23_1	20	14.8661	1.3236	0.3989	367	972.095	0.3782	0.0001	None significant
BHLHE40_known1	148	92.0927	1.6006	0.0795	9607	5797.24	1.6571	0.0001	Only significant in TCs in accessible promoters
BHLHE40_known2	118	121.183	0.9739	0.5205	13756	7963.34	1.7273	0.0001	Only significant in TCs in accessible promoters
BHLHE40_known3	40	49.3408	0.8144	0.4028	5883	3014.14	1.9515	0.0001	Only significant in TCs in accessible promoters
BHLHE40_known4	30	39.7984	0.7598	0.4351	5256	2562.7	2.0506	0.0001	Only significant in TCs in accessible promoters
BHLHE41_1	60	55.023	1.0888	0.4325	7406	3548.12	2.087	0.0001	Only significant in TCs in accessible promoters
BHLHE41_2	20	38.819	0.5274	0.2195	4630	2472.96	1.8719	0.0001	Only significant in TCs in accessible promoters
BPTF_1	111	84.5888	1.3086	0.2308	4676	5374.02	0.8701	0.006	None significant
BRCA1_known1	40	32.7798	1.2137	0.3517	1778	2102.24	0.8458	0.003	None significant
BRCA1_known2	70	51.9615	1.3406	0.189	4176	3340.51	1.25	0.0001	Only significant in TCs in accessible promoters
BSX_1	134	38.7652	3.3949	0.003	1325	2475.67	0.5354	0.0001	None significant
BSX_2	32	20.1605	1.5595	0.21	612	1294.91	0.473	0.0001	None significant
CACD_1	554	601.748	0.9208	0.3285	59392	38285.3	1.5513	0.0001	Only significant in TCs in accessible promoters
CBX5_1	37	46.5123	0.7998	0.4255	847	2903.17	0.292	0.0001	None significant
CCDC6_1	30	44.7323	0.6779	0.3789	1925	2823	0.682	0.0001	None significant
CDC5L_1	36	17.9624	1.9512	0.162	271	1173.92	0.2315	0.0001	None significant
CDX1_1	50	36.9148	1.3451	0.2445	684	2399.61	0.2853	0.0001	None significant
CDX1_2	29	24.7914	1.1632	0.3454	427	1570.54	0.2723	0.0001	None significant
CDX2_1	84	31.3206	2.6299	0.0225	390	1992.23	0.1962	0.0001	None significant
CDX2_2	66	41.4449	1.5785	0.158	585	2615.3	0.224	0.0001	None significant
CDX2_3	29	24.566	1.1734	0.3137	421	1554.24	0.2713	0.0001	None significant
CDX_1	18	43.4575	0.4274	0.2406	625	2801.33	0.2234	0.0001	None significant
CEBPA_1	49	48.4734	1.0106	0.4689	1471	3032.83	0.4852	0.0001	None significant
CEBPA_2	13	16.5909	0.7959	0.4739	777	1089.18	0.7136	0.0015	None significant
CEBPB_known1	69	78.7996	0.8772	0.3652	2733	5069.75	0.5392	0.0001	None significant
CEBPB_known10	20	12.3683	1.5709	0.3092	634	800.373	0.7924	0.0285	None significant
CEBPB_known2	70	44.7039	1.5535	0.1917	2541	2851.39	0.8912	0.045	None significant
CEBPB_known3	207	82.8177	2.4816	0.0001	3332	5287.27	0.6303	0.0001	Only significant in TCs in accessible enhancers
CEBPB_known4	56	30.3521	1.8181	0.1322	992	1952.5	0.5083	0.0001	None significant
CEBPB_known5	107	80.5035	1.3251	0.2333	4354	5063.66	0.8599	0.0045	None significant
CEBPB_known6	95	69.1829	1.3679	0.2046	2542	4591.08	0.5538	0.0001	None significant
CEBPB_known7	60	54.7897	1.0934	0.4477	1220	3542.33	0.3446	0.0001	None significant
CEBPB_known8	20	12.4353	1.563	0.3288	694	799.858	0.8678	0.1065	None significant
CEBPB_known9	20	12.8715	1.5139	0.3181	624	809.362	0.7713	0.006	None significant
CEBPD_1	39	44.8232	0.8729	0.451	2018	2800.37	0.7207	0.0001	None significant
CEBPD_2	20	12.0304	1.6116	0.305	664	784.923	0.8461	0.0872	None significant
CEBPE_1	25	13.7306	1.765	0.1529	724	837.326	0.8648	0.1058	None significant
CEBPG_1	3	51.4008	0.0763	0.0209	890	3245.72	0.2744	0.0001	None significant
CEBPG_2	35	12.5327	2.6602	0.024	683	814.145	0.8391	0.0629	None significant
CEBPG_3	25	13.7963	1.7572	0.1609	614	857.017	0.7168	0.003	None significant
CENPB_1	48	82.3288	0.588	0.172	13727	5293.48	2.5929	0.0001	Only significant in TCs in accessible promoters
CLOCK_1	53	36.7513	1.4304	0.186	2121	2292.11	0.9254	0.1185	None significant
CLOCK__ARNTL_1	50	35.7613	1.3873	0.1729	3736	2264.27	1.6497	0.0001	Only significant in TCs in accessible promoters
COMP1_1	249	148.291	1.6746	0.0464	8868	9408.08	0.9426	0.1134	None significant
CPEB1_1	0	34.93	0.0278	0.0067	610	2167.61	0.2817	0.0001	None significant
CPHX_1	70	43.8952	1.5815	0.1602	894	2755.59	0.3247	0.0001	None significant
CREB3L1_1	98	98.7139	0.9928	0.5371	11555	6423.42	1.7988	0.0001	Only significant in TCs in accessible promoters
CREB3L1_2	84	54.2882	1.5374	0.1276	5649	3580.67	1.5775	0.0001	Only significant in TCs in accessible promoters
CREB3L1_3	84	70.2849	1.1924	0.3331	5799	4477.95	1.2949	0.0001	Only significant in TCs in accessible promoters
CREB3L1_4	127	120.98	1.0494	0.3982	14520	7821.29	1.8564	0.0001	Only significant in TCs in accessible promoters
CREB3L2_1	108	99.7566	1.0818	0.3992	10643	6415.22	1.6589	0.0001	Only significant in TCs in accessible promoters
CREB3L2_2	94	77.3982	1.2118	0.3017	8561	4863.49	1.7601	0.0001	Only significant in TCs in accessible promoters
CREB3_1	113	60.6529	1.8491	0.0352	7578	3852.56	1.9668	0.0001	Only significant in TCs in accessible promoters
CREB3_2	80	69.0087	1.157	0.3546	10351	4381.84	2.3619	0.0001	Only significant in TCs in accessible promoters
CREB5_1	98	34.6433	2.7775	0.0001	4133	2201.58	1.8769	0.0001	Both significant
CRX_1	65	53.1776	1.2182	0.3203	2381	3420.42	0.6962	0.0001	None significant
CRX_2	16	44.489	0.3737	0.1866	3011	2863.33	1.0516	0.2416	None significant
CTCF_known2	225	353.271	0.6379	0.033	35859	22683.3	1.5808	0.0001	Only significant in TCs in accessible promoters
CUX1_1	0	13.6179	0.0684	0.291	444	895.335	0.4965	0.0001	None significant
CUX1_10	10	5.9961	1.5723	0.4197	130	350.061	0.3732	0.0001	None significant
CUX1_2	45	7.2069	5.605	0.0075	180	501.739	0.36	0.0001	None significant
CUX1_3	0	8.4371	0.106	0.3967	870	549.511	1.5822	0.0001	Only significant in TCs in accessible promoters
CUX1_4	30	37.628	0.8025	0.4756	2237	2430.3	0.9205	0.1467	None significant
CUX1_5	30	16.0053	1.823	0.1825	998	1031.03	0.968	0.3859	None significant
CUX1_6	35	41.2409	0.8523	0.4996	1776	2614.24	0.6795	0.0001	None significant
CUX1_7	45	28.2035	1.5752	0.2475	256	1692.03	0.1518	0.0001	None significant
CUX1_8	17	9.8537	1.6584	0.3832	164	615.846	0.2675	0.0001	None significant
CUX1_9	0	9.4941	0.0953	0.5553	273	675.927	0.4048	0.0001	None significant
CUX2_1	0	8.2554	0.108	0.5912	144	556.214	0.2602	0.0001	None significant
CUX2_2	0	4.4505	0.1835	0.6217	110	270.378	0.409	0.0001	None significant
DBP_1	49	31.1512	1.5552	0.1297	1200	1997.13	0.6011	0.0001	None significant
DBP_2	0	13.632	0.0683	0.2962	1147	926.869	1.2372	0.012	None significant
DBP_3	0	12.252	0.0755	0.3255	720	791.545	0.9097	0.2481	None significant
DBP_4	0	11.6737	0.0789	0.3453	669	786.823	0.8504	0.1022	None significant
DBX1_1	55	39.1515	1.3947	0.2311	357	2443.71	0.1464	0.0001	None significant
DBX2_1	16	29.1835	0.5632	0.3755	277	1890.68	0.147	0.0001	None significant
DDIT3__CEBPA_1	78	64.0475	1.2145	0.3122	3830	4093.63	0.9356	0.1126	None significant
DDIT3__CEBPA_2	24	48.8323	0.5017	0.1761	2515	3058.22	0.8224	0.003	None significant
DLX1_1	28	27.5668	1.0152	0.5099	397	1645.18	0.2418	0.0001	None significant
DLX1_2	30	15.563	1.8716	0.1613	393	989.321	0.3979	0.0001	None significant
DLX1_3	32	16.1681	1.9222	0.1303	527	996.892	0.5291	0.0001	None significant
DLX2_1	96	32.7045	2.878	0.0075	682	2027.47	0.3367	0.0001	None significant
DLX2_2	32	14.8806	2.078	0.106	527	993.761	0.5308	0.0001	None significant
DLX2_3	56	18.1713	2.9732	0.0045	327	1126.43	0.2909	0.0001	None significant
DLX3_1	69	29.1398	2.3225	0.042	620	1820.89	0.3409	0.0001	None significant
DLX3_2	32	15.3173	2.0224	0.1204	527	996.587	0.5293	0.0001	None significant
DLX4_1	17	29.7565	0.5852	0.4023	760	1910.78	0.3981	0.0001	None significant
DLX4_2	40	15.0197	2.5593	0.0375	518	946.293	0.5479	0.0001	None significant
DLX5_1	100	31.6602	3.0924	0.0089	1468	2050.28	0.7161	0.0001	None significant
DLX5_2	32	13.5852	2.2626	0.093	335	838.412	0.4003	0.0001	None significant
DLX6_1	24	15.4716	1.5178	0.2746	426	994.083	0.4291	0.0001	None significant
DMBX1_1	68	34.9436	1.9197	0.116	1382	2236.98	0.618	0.0001	None significant
DMBX1_2	0	20.0088	0.0476	0.1211	1143	1258.37	0.9084	0.1449	None significant
DMRT1_1	39	43.307	0.9028	0.4742	938	2781.9	0.3374	0.0001	None significant
DMRT2_1	32	40.03	0.8043	0.4871	440	2568.17	0.1717	0.0001	None significant
DMRT3_1	0	27.2146	0.0354	0.0936	410	1737.43	0.2364	0.0001	None significant
DMRTA1_1	13	30.0761	0.4505	0.282	462	1798.17	0.2573	0.0001	None significant
DMRTA2_1	91	51.1839	1.763	0.0826	1176	3253.63	0.3616	0.0001	None significant
DMRTC2_1	67	56.3839	1.185	0.3385	1397	3615.69	0.3865	0.0001	None significant
DOBOX4_1	68	42.5212	1.5854	0.1922	1292	2690.15	0.4805	0.0001	None significant
DOBOX5_1	34	46.4701	0.7373	0.427	1773	3079.72	0.5758	0.0001	None significant
DPRX_1	0	23.0261	0.0416	0.0812	1493	1489.77	1.0022	0.4859	None significant
DPRX_2	22	21.8748	1.0055	0.5605	1121	1429.28	0.7845	0.0045	None significant
DRGX_1	13	17.7141	0.7481	0.5483	131	1111.67	0.1186	0.0001	None significant
DUX4_1	49	59.5288	0.8261	0.3571	3926	3652.69	1.0748	0.1214	None significant
DUXA_1	13	32.5879	0.4168	0.2202	1041	2066.91	0.5039	0.0001	None significant
E2F2_1	90	292.538	0.31	0.0001	50558	18862.1	2.6803	0.0001	Only significant in TCs in accessible promoters
E2F2_2	75	44.1974	1.6815	0.1319	2728	2756.31	0.9897	0.4694	None significant
E2F2_3	27	28.4173	0.9518	0.5359	2501	1917.24	1.3043	0.0001	Only significant in TCs in accessible promoters
E2F2_4	32	21.4409	1.4705	0.3361	1445	1311.05	1.1021	0.1633	None significant
E2F7_1	69	49.5211	1.3856	0.2322	3711	3253.67	1.1405	0.012	None significant
E2F8_1	72	73.106	0.9851	0.5289	6676	4527.77	1.4744	0.0001	Only significant in TCs in accessible promoters
E2F_known1	9	35.2554	0.2758	0.0885	5122	2219.22	2.3074	0.0001	Only significant in TCs in accessible promoters
E2F_known10	29	41.7097	0.7024	0.2714	7384	2683.04	2.7515	0.0001	Only significant in TCs in accessible promoters
E2F_known11	32	34.4731	0.9303	0.5257	5986	2278.03	2.627	0.0001	Only significant in TCs in accessible promoters
E2F_known12	8	19.397	0.4412	0.296	3548	1230.73	2.8813	0.0001	Only significant in TCs in accessible promoters
E2F_known13	16	26.4351	0.6196	0.3374	4540	1693.51	2.6798	0.0001	Only significant in TCs in accessible promoters
E2F_known14	8	17.5405	0.4854	0.3259	3235	1159.17	2.7892	0.0001	Only significant in TCs in accessible promoters
E2F_known15	21	131.264	0.1663	0.0001	23663	8499.06	2.784	0.0001	Only significant in TCs in accessible promoters
E2F_known16	9	73.9353	0.1334	0.0015	14296	4807.4	2.9733	0.0001	Only significant in TCs in accessible promoters
E2F_known17	22	118.485	0.1925	0.0001	21373	7453.65	2.8672	0.0001	Only significant in TCs in accessible promoters
E2F_known18	36	156.042	0.2356	0.0001	30215	10100.2	2.9913	0.0001	Only significant in TCs in accessible promoters
E2F_known2	16	25.4562	0.6426	0.3787	4199	1614.99	2.599	0.0001	Only significant in TCs in accessible promoters
E2F_known20	27	71.9033	0.3841	0.0345	13186	4452.79	2.9608	0.0001	Only significant in TCs in accessible promoters
E2F_known21	50	87.2588	0.5778	0.1153	17663	5554.49	3.1796	0.0001	Only significant in TCs in accessible promoters
E2F_known22	16	24.2004	0.6746	0.4084	4199	1618.06	2.5941	0.0001	Only significant in TCs in accessible promoters
E2F_known23	123	258.204	0.4784	0.0105	43911	16583.1	2.6478	0.0001	Only significant in TCs in accessible promoters
E2F_known24	39	41.5318	0.9405	0.5585	3441	2568.25	1.3397	0.0001	Only significant in TCs in accessible promoters
E2F_known25	0	23.1492	0.0414	0.2404	2408	1524.9	1.5787	0.0001	Only significant in TCs in accessible promoters
E2F_known26	27	25.6564	1.0504	0.4134	1781	1622.08	1.0979	0.1643	None significant
E2F_known27	36	59.0437	0.6162	0.2326	9053	3756.21	2.4098	0.0001	Only significant in TCs in accessible promoters
E2F_known28	24	43.2535	0.5649	0.2652	6801	2781.7	2.4444	0.0001	Only significant in TCs in accessible promoters
E2F_known29	51	44.8388	1.1344	0.3519	3926	2872.65	1.3666	0.0001	Only significant in TCs in accessible promoters
E2F_known3	16	30.4066	0.5413	0.2075	5852	1946.79	3.0049	0.0001	Only significant in TCs in accessible promoters
E2F_known30	48	25.5515	1.8455	0.1226	1987	1633.18	1.2165	0.0089	None significant
E2F_known4	16	37.3815	0.4429	0.1432	5560	2351.29	2.3641	0.0001	Only significant in TCs in accessible promoters
E2F_known5	8	41.9963	0.2093	0.0255	7605	2753.54	2.7613	0.0001	Only significant in TCs in accessible promoters
E2F_known6	29	76.6635	0.3863	0.015	14265	4824.93	2.9561	0.0001	Only significant in TCs in accessible promoters
E2F_known7	24	27.5944	0.8743	0.512	5246	1762.78	2.9749	0.0001	Only significant in TCs in accessible promoters
E2F_known8	13	45.8399	0.2989	0.0165	8600	2879.58	2.9859	0.0001	Only significant in TCs in accessible promoters
E2F_known9	24	81.5187	0.303	0.021	15288	5212.82	2.9324	0.0001	Only significant in TCs in accessible promoters
E4F1_1	70	28.7822	2.384	0.0255	4843	1892.84	2.5578	0.0001	Only significant in TCs in accessible promoters
EBF1_known1	437	526.944	0.8296	0.2052	44175	33786.3	1.3075	0.0001	Only significant in TCs in accessible promoters
EBF1_known2	171	205.807	0.8317	0.2486	12670	13029.3	0.9724	0.154	None significant
EBF1_known3	181	234.258	0.7736	0.1275	16374	14814.6	1.1053	0.0001	Only significant in TCs in accessible promoters
EBF1_known4	190	192.72	0.986	0.4892	12824	12325.5	1.0404	0.1049	None significant
EGR1_known1	267	272.028	0.9816	0.4913	41398	17244.7	2.4005	0.0001	Only significant in TCs in accessible promoters
EGR1_known10	158	304.36	0.5207	0.0015	49453	19484.4	2.538	0.0001	Only significant in TCs in accessible promoters
EGR1_known11	359	609.529	0.5897	0.006	90893	39001.6	2.3305	0.0001	Only significant in TCs in accessible promoters
EGR1_known2	179	204.174	0.8773	0.3282	27517	13077.4	2.1041	0.0001	Only significant in TCs in accessible promoters
EGR1_known5	257	346.879	0.7416	0.075	50664	22027.1	2.3	0.0001	Only significant in TCs in accessible promoters
EGR1_known8	317	587.262	0.5406	0.0001	88453	37281.6	2.3725	0.0001	Only significant in TCs in accessible promoters
EGR1_known9	184	381.858	0.4832	0.0001	56973	24106.4	2.3633	0.0001	Only significant in TCs in accessible promoters
EGR3_1	149	238.871	0.6253	0.045	33348	15340.3	2.1738	0.0001	Only significant in TCs in accessible promoters
EGR3_2	399	653.433	0.6112	0.0015	100184	42181.4	2.375	0.0001	Only significant in TCs in accessible promoters
EGR3_3	204	442.464	0.4623	0.0001	67381	28256	2.3846	0.0001	Only significant in TCs in accessible promoters
EGR4_1	214	329.597	0.6503	0.024	49001	20895	2.345	0.0001	Only significant in TCs in accessible promoters
EHF_1	113	146.04	0.7753	0.2566	33175	9206.12	3.6033	0.0001	Only significant in TCs in accessible promoters
EHF_2	120	94.9854	1.2606	0.2297	22121	6058.22	3.651	0.0001	Only significant in TCs in accessible promoters
ELF1_known1	210	135.464	1.5462	0.03	8346	8721.2	0.957	0.108	None significant
ELF1_known2	108	95.8005	1.126	0.3776	24988	6180.18	4.0428	0.0001	Only significant in TCs in accessible promoters
ELF1_known3	53	69.5675	0.7652	0.3195	15457	4442.09	3.4791	0.0001	Only significant in TCs in accessible promoters
ELF2_1	710	561.291	1.2645	0.0737	54634	35417	1.5426	0.0001	Only significant in TCs in accessible promoters
ELF3_1	92	92.8036	0.9914	0.5601	12771	5890.07	2.168	0.0001	Only significant in TCs in accessible promoters
ELF3_2	120	89.4627	1.3376	0.1817	18080	5614.52	3.2198	0.0001	Only significant in TCs in accessible promoters
ELF3_3	121	93.9926	1.2843	0.2087	20135	6095.59	3.3028	0.0001	Only significant in TCs in accessible promoters
ELF4_1	139	101.206	1.3698	0.1732	25085	6497.93	3.86	0.0001	Only significant in TCs in accessible promoters
ELF5_1	88	69.5949	1.2607	0.2312	5306	4416.18	1.2014	0.0001	Only significant in TCs in accessible promoters
ELF5_2	106	112.694	0.9411	0.4366	22446	7169.33	3.1305	0.0001	Only significant in TCs in accessible promoters
ELF5_3	128	119.88	1.0672	0.4025	23951	7501.41	3.1926	0.0001	Only significant in TCs in accessible promoters
ELF5_4	128	115.3	1.1092	0.3436	23984	7351.4	3.2622	0.0001	Only significant in TCs in accessible promoters
ELK3_1	37	66.8675	0.5599	0.1151	22744	4226.95	5.3797	0.0001	Only significant in TCs in accessible promoters
ELK3_2	37	59.2718	0.6305	0.1717	21049	3846.94	5.4705	0.0001	Only significant in TCs in accessible promoters
ELK4_1	9	46.9518	0.2085	0.0255	16970	3022.39	5.6132	0.0001	Only significant in TCs in accessible promoters
ELK4_2	20	68.5476	0.302	0.0271	22386	4411.44	5.0736	0.0001	Only significant in TCs in accessible promoters
EMX1_1	20	17.8282	1.1153	0.4975	512	1131.75	0.4529	0.0001	None significant
EMX1_2	0	19.1177	0.0497	0.2266	213	1253.1	0.1706	0.0001	None significant
EMX2_1	68	33.4746	2.0015	0.1043	870	2063.24	0.4219	0.0001	None significant
EMX2_2	10	13.3245	0.7679	0.57	280	889.587	0.3155	0.0001	None significant
EMX2_3	0	20.5872	0.0463	0.2025	185	1360.96	0.1366	0.0001	None significant
EN1_1	22	13.2341	1.6158	0.135	963	823.781	1.1688	0.0326	None significant
EN1_2	77	78.9776	0.9753	0.5103	5537	5024.63	1.102	0.0119	None significant
EN1_3	50	30.4764	1.6203	0.1655	433	1833.53	0.2366	0.0001	None significant
EN1_4	60	21.0056	2.772	0.018	860	1349.02	0.6378	0.0001	None significant
EN1_5	28	22.5237	1.2328	0.4454	270	1455.12	0.1861	0.0001	None significant
EN1_6	32	13.2286	2.3193	0.0706	420	848.874	0.4954	0.0001	None significant
EN1_7	14	26.3471	0.5485	0.3825	438	1639.08	0.2677	0.0001	None significant
EN2_1	18	27.0353	0.6777	0.4565	557	1733.07	0.3218	0.0001	None significant
EN2_2	40	19.5146	1.9986	0.1244	485	1225.22	0.3963	0.0001	None significant
EN2_3	50	28.9548	1.7026	0.1567	1919	1813.48	1.0582	0.1993	None significant
EN2_4	20	16.8105	1.1791	0.4809	365	1064.93	0.3434	0.0001	None significant
EOMES_1	137	95.5022	1.43	0.1352	3341	6038.44	0.5534	0.0001	None significant
EOMES_2	65	64.0159	1.0151	0.4813	2274	4114.59	0.5528	0.0001	None significant
EOMES_3	110	87.0508	1.2606	0.2748	6987	5566.65	1.2551	0.0001	Only significant in TCs in accessible promoters
EP300_known1	394	311.741	1.263	0.132	32519	19586.2	1.6603	0.0001	Only significant in TCs in accessible promoters
ERF_1	20	64.1971	0.3221	0.0343	17625	4158.18	4.2379	0.0001	Only significant in TCs in accessible promoters
ERG_1	20	66.6367	0.3105	0.0255	19823	4244.77	4.6691	0.0001	Only significant in TCs in accessible promoters
ERG_2	41	60.6164	0.6816	0.2236	9851	3781.41	2.6047	0.0001	Only significant in TCs in accessible promoters
ERG_3	20	69.7402	0.2969	0.0164	20787	4410.65	4.7121	0.0001	Only significant in TCs in accessible promoters
ERG_4	55	58.9982	0.9334	0.4484	10511	3802.76	2.7636	0.0001	Only significant in TCs in accessible promoters
ESR2_1	510	334.169	1.5246	0.015	21318	21232.4	1.004	0.4533	None significant
ESRRA_known1	193	207.683	0.9296	0.4263	17715	13029	1.3596	0.0001	Only significant in TCs in accessible promoters
ESRRA_known10	102	107.44	0.9498	0.4998	4485	6958.71	0.6446	0.0001	None significant
ESRRA_known11	33	63.093	0.5305	0.1395	2073	3984.67	0.5204	0.0001	None significant
ESRRA_known2	104	112.278	0.9269	0.4313	4543	7137.55	0.6365	0.0001	None significant
ESRRA_known3	176	146.031	1.2038	0.2085	9579	9210.93	1.04	0.1019	None significant
ESRRA_known4	1139	807.114	1.4107	0.0059	69915	51534.2	1.3567	0.0001	Only significant in TCs in accessible promoters
ESRRA_known5	85	127.143	0.6711	0.1689	6856	8129.16	0.8434	0.0001	None significant
ESRRA_known6	123	139.826	0.8805	0.3953	10816	8835.66	1.2241	0.0001	Only significant in TCs in accessible promoters
ESRRA_known7	55	78.6448	0.7031	0.2317	3671	4959.12	0.7403	0.0001	None significant
ESRRA_known8	95	123.521	0.771	0.2869	6067	7768.58	0.781	0.0001	None significant
ESRRA_known9	214	187.037	1.1434	0.3233	13124	12095.9	1.085	0.0074	None significant
ESRRB_1	115	143.152	0.8047	0.2436	7537	9170.99	0.8219	0.0001	None significant
ESRRB_2	44	63.0419	0.7027	0.2925	1894	4077.41	0.4646	0.0001	None significant
ESRRG_1	117	151.388	0.7743	0.2861	10645	9826.03	1.0833	0.025	None significant
ESRRG_2	136	134.395	1.0119	0.4872	6399	8602.01	0.7439	0.0001	None significant
ESRRG_3	50	63.6928	0.7883	0.3367	2681	4019.39	0.6671	0.0001	None significant
ESX1_1	0	21.574	0.0443	0.2476	276	1403.41	0.1972	0.0001	None significant
ESX1_2	40	21.4809	1.8238	0.1487	691	1321.71	0.5232	0.0001	None significant
ESX1_3	40	19.1993	2.0298	0.1032	570	1247.03	0.4575	0.0001	None significant
ETS_1	283	255.287	1.1081	0.3037	30242	16157.4	1.8717	0.0001	Only significant in TCs in accessible promoters
ETS_2	136	151.781	0.8967	0.3325	19193	9674.9	1.9837	0.0001	Only significant in TCs in accessible promoters
ETS_known1	276	196.835	1.4002	0.0838	25570	12571	2.034	0.0001	Only significant in TCs in accessible promoters
ETS_known10	78	118.58	0.6606	0.1839	35244	7617.93	4.626	0.0001	Only significant in TCs in accessible promoters
ETS_known11	37	66.636	0.5618	0.1118	23232	4282.28	5.4241	0.0001	Only significant in TCs in accessible promoters
ETS_known12	20	63.1501	0.3274	0.0446	21424	3970.43	5.3948	0.0001	Only significant in TCs in accessible promoters
ETS_known13	68	126.139	0.5427	0.1163	25908	8053.32	3.2168	0.0001	Only significant in TCs in accessible promoters
ETS_known14	40	72.5265	0.5576	0.1424	21127	4648.96	4.5437	0.0001	Only significant in TCs in accessible promoters
ETS_known15	72	116.137	0.6232	0.1718	19277	7393.94	2.6069	0.0001	Only significant in TCs in accessible promoters
ETS_known16	10	65.7987	0.1647	0.012	19209	4019.63	4.7779	0.0001	Only significant in TCs in accessible promoters
ETS_known17	148	166.121	0.8916	0.3985	23688	10659.5	2.2221	0.0001	Only significant in TCs in accessible promoters
ETS_known18	67	73.3198	0.915	0.4119	22502	4632.29	4.8568	0.0001	Only significant in TCs in accessible promoters
ETS_known2	84	171.58	0.4925	0.0285	42900	11057.9	3.8793	0.0001	Only significant in TCs in accessible promoters
ETS_known3	124	110.762	1.1184	0.3314	21381	6903.45	3.0968	0.0001	Only significant in TCs in accessible promoters
ETS_known4	288	344.431	0.8366	0.2256	28198	21572.2	1.3071	0.0001	Only significant in TCs in accessible promoters
ETS_known5	225	182.762	1.2299	0.1963	12984	11584.2	1.1208	0.0001	Only significant in TCs in accessible promoters
ETS_known6	279	288.751	0.9663	0.4455	51109	18475.5	2.7662	0.0001	Only significant in TCs in accessible promoters
ETS_known7	10	81.705	0.133	0.0015	24467	5235.46	4.6726	0.0001	Only significant in TCs in accessible promoters
ETS_known9	174	167.819	1.0366	0.436	41308	10746.2	3.8437	0.0001	Only significant in TCs in accessible promoters
ETV1_1	17	59.9101	0.2955	0.0225	21372	3843.61	5.5592	0.0001	Only significant in TCs in accessible promoters
ETV2_1	33	59.069	0.566	0.1703	13832	3767.07	3.6711	0.0001	Only significant in TCs in accessible promoters
ETV3_1	30	59.7822	0.51	0.1332	18607	3808.91	4.8841	0.0001	Only significant in TCs in accessible promoters
ETV4_2	34	59.1855	0.5815	0.1611	21644	3910.61	5.5335	0.0001	Only significant in TCs in accessible promoters
ETV5_1	27	64.0775	0.4303	0.0428	22702	4103.66	5.531	0.0001	Only significant in TCs in accessible promoters
ETV6_1	156	244.965	0.6383	0.066	48497	15922.6	3.0457	0.0001	Only significant in TCs in accessible promoters
ETV6_2	123	103.417	1.1875	0.2682	24656	6656.75	3.7035	0.0001	Only significant in TCs in accessible promoters
ETV7_1	166	110.871	1.4928	0.0425	11119	7057.57	1.5754	0.0001	Only significant in TCs in accessible promoters
EVX1_1	36	33.6402	1.0681	0.385	709	2125.09	0.3339	0.0001	None significant
EVX1_2	30	20.0422	1.4732	0.2772	577	1298.09	0.4449	0.0001	None significant
EVX2_1	34	33.0554	1.0277	0.5285	1399	2165.39	0.6462	0.0001	None significant
EVX2_2	50	22.1407	2.2039	0.0637	537	1428.12	0.3765	0.0001	None significant
FEV_1	70	63.4167	1.1022	0.3952	9327	4079.42	2.286	0.0001	Only significant in TCs in accessible promoters
FEV_2	30	56.4466	0.5396	0.1564	20038	3585.9	5.5867	0.0001	Only significant in TCs in accessible promoters
FIGLA_1	204	159.55	1.2769	0.1217	6778	10099	0.6712	0.0001	None significant
FLI1_1	10	65.677	0.165	0.006	21469	4313.77	4.9759	0.0001	Only significant in TCs in accessible promoters
FLI1_2	53	58.8211	0.9027	0.4326	10863	3781.44	2.8722	0.0001	Only significant in TCs in accessible promoters
FLI1_3	20	62.4859	0.3308	0.0508	19866	4052.14	4.9016	0.0001	Only significant in TCs in accessible promoters
FLI1_4	69	64.2611	1.0726	0.4543	11794	4113.73	2.8665	0.0001	Only significant in TCs in accessible promoters
FOXA_known1	74	81.5816	0.9082	0.4251	1166	5321.11	0.2193	0.0001	None significant
FOXA_known2	109	92.353	1.1783	0.3003	976	5891.15	0.1658	0.0001	None significant
FOXA_known3	216	117.176	1.8362	0.012	1750	7365.58	0.2377	0.0001	None significant
FOXA_known4	240	162.43	1.4746	0.0808	3383	10476.7	0.323	0.0001	None significant
FOXA_known5	121	107.163	1.1279	0.3395	1713	6793.12	0.2523	0.0001	None significant
FOXA_known6	108	90.0532	1.1971	0.2892	1324	5840.7	0.2268	0.0001	None significant
FOXA_known7	85	93.6591	0.9085	0.4626	1325	5845.68	0.2268	0.0001	None significant
FOXB1_1	47	77.1576	0.6141	0.1815	4192	5025.71	0.8341	0.0001	None significant
FOXB1_2	36	50.5747	0.7174	0.3883	306	3329.33	0.0922	0.0001	None significant
FOXB1_3	44	49.5839	0.8896	0.5009	410	3148.35	0.1305	0.0001	None significant
FOXB1_4	54	42.0293	1.2782	0.3051	772	2699.6	0.2862	0.0001	None significant
FOXC1_1	32	71.3797	0.4559	0.1301	1587	4467.69	0.3554	0.0001	None significant
FOXC1_2	39	29.6724	1.3041	0.271	1943	1875.93	1.0357	0.2799	None significant
FOXC1_3	65	89.5186	0.7291	0.2641	1387	5815.97	0.2386	0.0001	None significant
FOXC1_4	28	36.2748	0.778	0.4846	227	2227.94	0.1023	0.0001	None significant
FOXC1_5	22	51.4934	0.4382	0.1206	439	3321.82	0.1324	0.0001	None significant
FOXC1_6	88	66.6126	1.3163	0.2211	1136	4260.25	0.2668	0.0001	None significant
FOXC2_1	28	34.0767	0.8268	0.5204	219	2134.88	0.103	0.0001	None significant
FOXC2_2	77	68.5414	1.1216	0.3783	1074	4389.03	0.2449	0.0001	None significant
FOXC2_3	48	75.1967	0.6431	0.2022	730	4768.85	0.1533	0.0001	None significant
FOXD1_1	59	93.7138	0.6335	0.1845	1736	6122.31	0.2837	0.0001	None significant
FOXD1_2	56	35.228	1.5734	0.1362	915	2317.32	0.3951	0.0001	None significant
FOXD2_1	42	47.4167	0.8881	0.5133	349	3105.75	0.1127	0.0001	None significant
FOXD2_2	49	31.2949	1.5482	0.14	800	2010.08	0.3983	0.0001	None significant
FOXD3_1	24	63.208	0.3894	0.0885	887	4101.39	0.2165	0.0001	None significant
FOXD3_2	36	58.5331	0.6215	0.2212	850	3872.86	0.2197	0.0001	None significant
FOXD3_3	42	48.8064	0.8633	0.4849	421	3093.81	0.1364	0.0001	None significant
FOXD3_4	49	31.1808	1.5537	0.1409	800	2022.79	0.3958	0.0001	None significant
FOXF1_1	48	56.5775	0.851	0.4176	990	3690.06	0.2685	0.0001	None significant
FOXF2_1	80	67.6643	1.1797	0.3726	1589	4245.21	0.3745	0.0001	None significant
FOXF2_2	42	53.7013	0.7861	0.3976	1026	3452.73	0.2974	0.0001	None significant
FOXG1_1	82	65.4523	1.249	0.3124	800	4188.71	0.1912	0.0001	None significant
FOXG1_2	82	55.0179	1.4817	0.1701	2989	3413.72	0.8756	0.015	None significant
FOXG1_3	95	64.6968	1.4613	0.1709	453	4094.47	0.1109	0.0001	None significant
FOXG1_4	96	91.9464	1.0436	0.4549	6839	5789.59	1.1812	0.0001	Only significant in TCs in accessible promoters
FOXG1_5	49	31.4327	1.5417	0.1399	800	2012.08	0.3979	0.0001	None significant
FOXI1_1	122	81.2246	1.4959	0.1066	1454	5155.51	0.2822	0.0001	None significant
FOXI1_2	108	63.7415	1.6836	0.0763	1147	4153.75	0.2763	0.0001	None significant
FOXI1_3	49	30.6796	1.5783	0.1305	800	2005.75	0.3992	0.0001	None significant
FOXI1_4	51	47.2001	1.0788	0.4778	909	2940.6	0.3094	0.0001	None significant
FOXJ1_1	39	67.8439	0.581	0.182	887	4353.57	0.2039	0.0001	None significant
FOXJ1_2	64	76.9617	0.8337	0.4057	1608	4944.23	0.3254	0.0001	None significant
FOXJ2_1	108	120.394	0.8979	0.4273	1443	7666.67	0.1883	0.0001	None significant
FOXJ2_2	42	32.5519	1.2816	0.3556	333	2136.16	0.1563	0.0001	None significant
FOXJ2_3	68	68.1332	0.9981	0.507	1043	4392.3	0.2376	0.0001	None significant
FOXJ2_4	30	29.2802	1.0238	0.4794	726	1859.98	0.3907	0.0001	None significant
FOXJ2_5	27	57.7254	0.4768	0.1511	792	3691.84	0.2147	0.0001	None significant
FOXJ3_1	51	88.8478	0.5788	0.1934	1954	5580.89	0.3502	0.0001	None significant
FOXJ3_2	22	20.4457	1.0725	0.4461	353	1349	0.2622	0.0001	None significant
FOXJ3_3	66	58.5705	1.1247	0.3648	771	3695.96	0.2088	0.0001	None significant
FOXJ3_4	39	62.2083	0.6328	0.239	1098	3892.82	0.2822	0.0001	None significant
FOXJ3_5	55	38.2643	1.4262	0.221	1568	2382.97	0.6581	0.0001	None significant
FOXJ3_6	80	71.6143	1.1155	0.3801	1222	4588.47	0.2665	0.0001	None significant
FOXJ3_7	38	28.9893	1.3005	0.2861	455	1881.04	0.2423	0.0001	None significant
FOXJ3_8	91	81.5846	1.114	0.3783	1415	5066.59	0.2794	0.0001	None significant
FOXK1_1	34	84.0608	0.4115	0.0935	1669	5258.54	0.3175	0.0001	None significant
FOXK1_2	50	34.0461	1.4552	0.23	2279	2187.43	1.0418	0.2444	None significant
FOXK1_3	55	46.7328	1.1732	0.3716	3289	3029.39	1.0857	0.0822	None significant
FOXK1_4	49	31.8783	1.5208	0.1428	800	2000.87	0.4001	0.0001	None significant
FOXL1_1	48	57.3657	0.8395	0.4671	657	3516.96	0.187	0.0001	None significant
FOXL1_2	8	10.3727	0.7914	0.6135	143	679.609	0.2116	0.0001	None significant
FOXL1_3	45	79.5282	0.5712	0.1524	1095	4960.71	0.2209	0.0001	None significant
FOXL1_4	49	31.7849	1.5251	0.1621	800	2014.09	0.3975	0.0001	None significant
FOXL1_5	52	72.5083	0.721	0.2971	940	4517.48	0.2083	0.0001	None significant
FOXM1_1	72	33.2001	2.1345	0.018	1278	2133.42	0.5992	0.0001	None significant
FOXN1_1	2	37.5913	0.0777	0.0405	7027	2439.08	2.8802	0.0001	Only significant in TCs in accessible promoters
FOXO1_1	17	40.9654	0.4289	0.1083	1048	2667.1	0.3932	0.0001	None significant
FOXO1_2	42	60.3188	0.7013	0.323	1853	3815.18	0.4858	0.0001	None significant
FOXO1_3	32	25.0951	1.2646	0.3565	667	1673.62	0.3989	0.0001	None significant
FOXO1_4	39	29.3064	1.3199	0.3383	379	1831.53	0.2074	0.0001	None significant
FOXO1_5	195	206.859	0.9429	0.4375	15084	13260.4	1.1375	0.0001	Only significant in TCs in accessible promoters
FOXO3_1	42	61.4348	0.6887	0.297	1346	3976.59	0.3386	0.0001	None significant
FOXO3_2	60	56.1991	1.0665	0.4522	897	3641.26	0.2466	0.0001	None significant
FOXO3_3	80	51.4339	1.5448	0.0941	1433	3312.48	0.4328	0.0001	None significant
FOXO3_4	28	22.8473	1.2161	0.4317	312	1506.51	0.2076	0.0001	None significant
FOXO3_5	56	36.702	1.5119	0.1628	915	2305.26	0.3972	0.0001	None significant
FOXO3_6	156	198.271	0.7879	0.1824	14883	12606.6	1.1806	0.0001	Only significant in TCs in accessible promoters
FOXO4_1	50	50.8725	0.9832	0.5389	1945	3263.87	0.596	0.0001	None significant
FOXO4_2	70	62.7474	1.1138	0.4269	2010	4052.37	0.4961	0.0001	None significant
FOXO4_3	29	27.0222	1.0706	0.3475	443	1719.8	0.258	0.0001	None significant
FOXO4_4	49	31.1562	1.5549	0.1351	800	2018.84	0.3966	0.0001	None significant
FOXO4_5	168	168.787	0.9954	0.5307	12182	10744.3	1.1338	0.0001	Only significant in TCs in accessible promoters
FOXO6_1	28	30.2711	0.9274	0.5773	402	1932.09	0.2085	0.0001	None significant
FOXO6_2	49	31.4893	1.539	0.144	800	2010.69	0.3982	0.0001	None significant
FOXO6_3	249	217.415	1.1446	0.2793	17511	13932.1	1.2569	0.0001	Only significant in TCs in accessible promoters
FOXP3_1	82	92.3469	0.8892	0.4124	2961	5813.07	0.5095	0.0001	None significant
FOXQ1_1	8	44.8757	0.1962	0.0255	514	2733.18	0.1884	0.0001	None significant
FOXQ1_2	29	30.7464	0.945	0.4905	356	1988.66	0.1794	0.0001	None significant
FOX_1	68	75.5293	0.9016	0.4355	912	4887.36	0.1868	0.0001	None significant
GATA_known1	110	95.2044	1.1538	0.3092	9977	5986.74	1.6664	0.0001	Only significant in TCs in accessible promoters
GATA_known10	36	86.9441	0.4207	0.0488	3228	5466.96	0.5905	0.0001	None significant
GATA_known11	7	20.0599	0.3799	0.1949	445	1265.56	0.3521	0.0001	None significant
GATA_known14	108	83.4428	1.2908	0.2629	4138	5559.35	0.7444	0.0001	None significant
GATA_known15	55	46.3592	1.1825	0.3711	1386	2882.67	0.481	0.0001	None significant
GATA_known16	44	69.9441	0.6343	0.3153	1896	4535.72	0.4181	0.0001	None significant
GATA_known17	66	46.6071	1.4074	0.2431	1006	3080.79	0.3268	0.0001	None significant
GATA_known18	34	44.4905	0.7694	0.4652	950	2742.58	0.3466	0.0001	None significant
GATA_known2	60	77.881	0.7733	0.2825	8488	4973.09	1.7066	0.0001	Only significant in TCs in accessible promoters
GATA_known20	16	21.5947	0.7524	0.4615	621	1327.73	0.4681	0.0001	None significant
GATA_known21	8	20.2246	0.424	0.2688	525	1268.23	0.4144	0.0001	None significant
GATA_known22	16	18.9868	0.8506	0.5397	543	1213.24	0.448	0.0001	None significant
GATA_known3	45	51.7366	0.8723	0.4228	3245	3273.05	0.9914	0.4363	None significant
GATA_known4	28	41.1042	0.6888	0.3906	2252	2578.46	0.8734	0.0285	None significant
GATA_known5	68	59.8312	1.1343	0.3818	4424	3698.94	1.196	0.0014	Only significant in TCs in accessible promoters
GATA_known6	87	51.9364	1.6624	0.1055	1765	3318.6	0.532	0.0001	None significant
GATA_known7	22	34.5865	0.6463	0.3279	1046	2145.33	0.4878	0.0001	None significant
GATA_known8	40	25.9601	1.5208	0.2169	637	1672.42	0.3813	0.0001	None significant
GATA_known9	49	19.289	2.4644	0.0464	760	1234.66	0.6159	0.0001	None significant
GBX1_1	0	27.0502	0.0357	0.1711	641	1665.17	0.3853	0.0001	None significant
GBX1_2	50	17.4286	2.7674	0.0266	481	1148.21	0.4194	0.0001	None significant
GBX1_3	50	20.1795	2.408	0.048	580	1294.62	0.4484	0.0001	None significant
GBX2_1	17	31.0538	0.5616	0.352	1141	1950.13	0.5853	0.0001	None significant
GBX2_2	50	20.7087	2.3493	0.0465	514	1366.57	0.3766	0.0001	None significant
GBX2_3	0	17.2342	0.0548	0.2357	201	1132.19	0.1783	0.0001	None significant
GBX2_4	50	21.1351	2.304	0.0475	667	1357.79	0.4916	0.0001	None significant
GBX2_5	60	21.0743	2.7634	0.012	474	1345.3	0.3528	0.0001	None significant
GCM1_1	79	171.741	0.4631	0.0299	19529	11033.1	1.77	0.0001	Only significant in TCs in accessible promoters
GCM1_2	40	72.3288	0.5591	0.1034	5567	4533.19	1.228	0.0001	Only significant in TCs in accessible promoters
GCM1_3	258	209.393	1.231	0.1986	19166	13236.9	1.4479	0.0001	Only significant in TCs in accessible promoters
GCM1_4	84	106.042	0.7941	0.2558	9406	6654.03	1.4135	0.0001	Only significant in TCs in accessible promoters
GCM2_1	51	85.6447	0.6002	0.1233	8876	5542.12	1.6014	0.0001	Only significant in TCs in accessible promoters
GCM_1	90	119.52	0.7551	0.232	7329	7589.58	0.9657	0.1965	None significant
GFI1B_1	60	54.2395	1.1043	0.4206	1761	3310.27	0.5321	0.0001	None significant
GFI1_1	98	154.649	0.636	0.1863	7486	9952.4	0.7522	0.0001	None significant
GFI1_2	78	84.5602	0.9233	0.4555	4555	5406.09	0.8426	0.0015	None significant
GFI1_3	82	62.0191	1.3171	0.1939	2997	3879.73	0.7725	0.0001	None significant
GLI2_1	433	368.39	1.1749	0.1559	34979	23484	1.4895	0.0001	Only significant in TCs in accessible promoters
GLI2_2	185	146.954	1.2571	0.1823	15232	9351.86	1.6287	0.0001	Only significant in TCs in accessible promoters
GLIS1_1	160	199.551	0.8028	0.2457	25217	12835.3	1.9646	0.0001	Only significant in TCs in accessible promoters
GLIS2_1	317	318.799	0.9944	0.5046	29575	19997.4	1.4789	0.0001	Only significant in TCs in accessible promoters
GLIS2_2	299	462.851	0.6468	0.0195	56089	29835.6	1.8799	0.0001	Only significant in TCs in accessible promoters
GLIS3_1	186	195.651	0.9509	0.4344	19320	12496.2	1.546	0.0001	Only significant in TCs in accessible promoters
GLI_1	263	259.344	1.014	0.4507	21145	16590.2	1.2745	0.0001	Only significant in TCs in accessible promoters
GMEB1_1	89	106.996	0.8334	0.388	18283	6781.4	2.6958	0.0001	Only significant in TCs in accessible promoters
GMEB2_1	16	8.6859	1.7551	0.2681	1414	537.961	2.6254	0.0001	Only significant in TCs in accessible promoters
GMEB2_2	20	24.1079	0.8364	0.4703	3495	1550.2	2.2537	0.0001	Only significant in TCs in accessible promoters
GMEB2_3	0	24.0758	0.0399	0.162	5414	1543.32	3.5064	0.0001	Only significant in TCs in accessible promoters
GMEB2_4	0	2.914	0.2555	0.6755	449	179.924	2.4872	0.0001	Only significant in TCs in accessible promoters
GRHL1_1	56	51.8306	1.0789	0.3956	5117	3372.26	1.5172	0.0001	Only significant in TCs in accessible promoters
GRHL1_2	20	18.1617	1.0959	0.4834	1306	1137.07	1.1484	0.0589	None significant
GRHL1_3	36	20.8452	1.6937	0.2325	1028	1330.17	0.773	0.009	None significant
GSC2_1	10	22.9286	0.4597	0.3122	1226	1450.12	0.8456	0.024	None significant
GSC_1	17	36.35	0.4819	0.2896	1814	2320.09	0.782	0.0001	None significant
GSC_2	0	22.9949	0.0417	0.0751	1236	1499.98	0.8241	0.0075	None significant
GSX1_1	20	25.8677	0.7816	0.4639	598	1630.19	0.3672	0.0001	None significant
GSX2_1	32	28.2206	1.1293	0.4622	580	1794.61	0.3236	0.0001	None significant
GSX2_2	20	25.1709	0.8024	0.5103	579	1604.49	0.3613	0.0001	None significant
GTF2A_1	51	57.3766	0.8908	0.4407	4432	3726.41	1.1893	0.0001	Only significant in TCs in accessible promoters
GTF2I_1	290	231.658	1.2508	0.1093	23861	14964.8	1.5944	0.0001	Only significant in TCs in accessible promoters
GZF1_1	48	16.4123	2.8141	0.039	1758	1069.13	1.6437	0.0001	Only significant in TCs in accessible promoters
HAND1_1	197	159.746	1.2318	0.2281	8721	10171.4	0.8574	0.0001	None significant
HAND1_2	110	85.9659	1.2764	0.2053	3899	5385.59	0.724	0.0001	None significant
HBP1_1	112	73.2344	1.5222	0.129	1263	4616.9	0.2737	0.0001	None significant
HDX_1	136	66.7098	2.0233	0.0285	2655	4378.11	0.6065	0.0001	None significant
HERPUD1_1	277	173.028	1.5974	0.045	15060	11149.6	1.3507	0.0001	Only significant in TCs in accessible promoters
HES1_1	230	288.706	0.7974	0.1776	31739	18195.8	1.7443	0.0001	Only significant in TCs in accessible promoters
HES5_1	60	92.2746	0.654	0.1845	9732	5785.12	1.6821	0.0001	Only significant in TCs in accessible promoters
HES7_1	114	97.6339	1.1659	0.3214	11063	6188.85	1.7874	0.0001	Only significant in TCs in accessible promoters
HESX1_1	50	20.5554	2.366	0.051	410	1225.69	0.335	0.0001	None significant
HESX1_2	15	25.9033	0.5947	0.4315	390	1641.85	0.238	0.0001	None significant
HEY1_known1	63	77.4865	0.8154	0.3085	10902	4940.54	2.2064	0.0001	Only significant in TCs in accessible promoters
HEY2_1	120	134.429	0.8935	0.3643	18393	8605.48	2.1372	0.0001	Only significant in TCs in accessible promoters
HEY2_2	72	82.4204	0.8751	0.4193	9565	5210.7	1.8355	0.0001	Only significant in TCs in accessible promoters
HIC1_3	411	220.718	1.8582	0.0014	12456	13887.7	0.8969	0.0001	None significant
HIC1_4	683	470.873	1.4495	0.0164	36872	30064	1.2264	0.0001	Only significant in TCs in accessible promoters
HIC1_5	196	114.614	1.7039	0.0118	5279	7416.05	0.7119	0.0001	None significant
HIC2_1	257	153.973	1.6648	0.0059	11282	9790.09	1.1524	0.0001	Only significant in TCs in accessible promoters
HIF1A_1	75	107.732	0.699	0.1995	15789	6894.69	2.2898	0.0001	Only significant in TCs in accessible promoters
HIF1A_2	116	154.602	0.7519	0.2	23829	9891.81	2.4088	0.0001	Only significant in TCs in accessible promoters
HIF1A__ARNT_1	80	53.7815	1.4786	0.1262	7464	3328.3	2.2422	0.0001	Only significant in TCs in accessible promoters
HINFP_1	0	26.151	0.0368	0.0525	5566	1663.36	3.3448	0.0001	Only significant in TCs in accessible promoters
HINFP_2	84	292.889	0.2892	0.0001	53528	18624	2.874	0.0001	Only significant in TCs in accessible promoters
HINFP_3	135	709.487	0.1914	0.0001	121131	45757.8	2.6472	0.0001	Only significant in TCs in accessible promoters
HINFP_4	279	706.096	0.396	0.0001	117339	45728.5	2.566	0.0001	Only significant in TCs in accessible promoters
HLF_1	10	14.6875	0.7012	0.5348	845	957.788	0.8824	0.117	None significant
HLF_2	24	21.6315	1.1047	0.4946	2100	1323.11	1.5867	0.0001	Only significant in TCs in accessible promoters
HLF_3	1	17.1293	0.1103	0.2214	933	1116.11	0.8361	0.048	None significant
HLF_4	0	8.5032	0.1052	0.4547	488	560.652	0.8706	0.1908	None significant
HLTF_1	10	33.4318	0.3195	0.1169	1482	2124.85	0.6976	0.0001	None significant
HLX_1	30	24.2796	1.2263	0.4189	234	1511.33	0.1554	0.0001	None significant
HMBOX1_1	17	34.6572	0.5048	0.3205	999	2204.23	0.4535	0.0001	None significant
HMBOX1_2	50	17.1017	2.8174	0.0195	768	1097.8	0.6999	0.0001	None significant
HMGA1_1	21	26.1752	0.8096	0.4532	942	1679.78	0.561	0.0001	None significant
HMX1_1	85	43.3499	1.9391	0.0875	996	2782.27	0.3582	0.0001	None significant
HMX1_2	22	24.6988	0.895	0.5966	416	1616.82	0.2578	0.0001	None significant
HMX2_1	51	41.9648	1.2103	0.3949	799	2611.58	0.3062	0.0001	None significant
HMX2_2	22	29.0293	0.7659	0.4787	637	1858.07	0.3432	0.0001	None significant
HMX3_1	40	60.9644	0.6617	0.2405	4544	3825.16	1.1879	0.0001	Only significant in TCs in accessible promoters
HMX3_2	51	40.6126	1.2496	0.3774	718	2589.5	0.2776	0.0001	None significant
HMX3_3	66	31.5276	2.0598	0.0615	908	2029.84	0.4476	0.0001	None significant
HNF1A_1	98	40.0636	2.4109	0.0225	486	2554.85	0.1905	0.0001	None significant
HNF1A_2	17	23.7958	0.7259	0.4748	957	1573.27	0.6085	0.0001	None significant
HNF1A_3	0	26.7316	0.0361	0.1711	1260	1669.81	0.7547	0.006	None significant
HNF1A_4	75	34.3903	2.1475	0.0676	489	2206.48	0.222	0.0001	None significant
HNF1B_1	48	31.7176	1.4977	0.2176	363	1964.55	0.1852	0.0001	None significant
HNF1B_2	17	32.0487	0.5447	0.3796	1263	1997.28	0.6325	0.0001	None significant
HNF1B_3	65	28.1504	2.2641	0.0435	520	1779.55	0.2926	0.0001	None significant
HNF1B_4	60	33.0977	1.789	0.141	542	2175.55	0.2495	0.0001	None significant
HNF1_1	90	42.184	2.1073	0.0435	563	2756.96	0.2045	0.0001	None significant
HNF1_2	68	57.7467	1.1745	0.3912	767	3571.86	0.215	0.0001	None significant
HNF1_3	145	53.3776	2.6849	0.0059	681	3479.27	0.196	0.0001	None significant
HNF1_4	105	66.0131	1.5818	0.1634	920	4162.32	0.2212	0.0001	None significant
HNF4_known1	290	320.561	0.905	0.3678	25850	20470.9	1.2628	0.0001	Only significant in TCs in accessible promoters
HNF4_known13	239	148.067	1.61	0.024	8342	9495.85	0.8785	0.0001	None significant
HNF4_known14	201	212.321	0.9469	0.444	14925	13624.7	1.0954	0.0014	Only significant in TCs in accessible promoters
HNF4_known15	151	221.797	0.6822	0.1172	20086	14243.5	1.4102	0.0001	Only significant in TCs in accessible promoters
HNF4_known16	91	78.558	1.1564	0.3513	3762	5036.76	0.747	0.0001	None significant
HNF4_known17	178	150.595	1.1808	0.2822	12070	9798.56	1.2318	0.0001	Only significant in TCs in accessible promoters
HNF4_known18	87	96.9056	0.8988	0.412	5260	6406.4	0.8211	0.0001	None significant
HNF4_known19	171	110.882	1.5373	0.0615	7353	6937.42	1.0599	0.0781	None significant
HNF4_known2	239	146.813	1.6237	0.0329	8342	9457.03	0.8821	0.0001	None significant
HNF4_known20	152	121.683	1.2471	0.2333	8121	7838.16	1.0361	0.2094	None significant
HNF4_known21	90	88.9257	1.0119	0.4769	4873	5516.26	0.8834	0.0105	None significant
HNF4_known22	120	129.405	0.9279	0.4482	8301	8124.94	1.0217	0.3193	None significant
HNF4_known23	139	162.323	0.8572	0.3254	10579	10298.2	1.0273	0.228	None significant
HNF4_known24	242	165.02	1.4637	0.0731	10444	10536.2	0.9913	0.395	None significant
HNF4_known25	81	86.3133	0.9391	0.4514	5028	5508	0.9129	0.0135	None significant
HNF4_known26	184	143.624	1.2792	0.1878	8809	9142.8	0.9635	0.1559	None significant
HNF4_known3	166	172.716	0.9613	0.4828	12156	10939.4	1.1112	0.0001	Only significant in TCs in accessible promoters
HNF4_known4	142	76.4912	1.8454	0.0236	4599	4900.83	0.9384	0.099	None significant
HNF4_known5	340	233.537	1.4539	0.0329	12685	14852.9	0.854	0.0001	None significant
HNF4_known6	293	183.489	1.5936	0.0194	9324	11525.4	0.809	0.0001	None significant
HNF4_known7	322	185.442	1.7324	0.0044	10235	11780.5	0.8688	0.0001	None significant
HNF4_known8	180	79.3205	2.2535	0.0001	4230	5051.4	0.8374	0.0001	Only significant in TCs in accessible enhancers
HNF4_known9	272	231.466	1.1744	0.247	14139	14479	0.9765	0.2192	None significant
HOMEZ_1	17	11.6203	1.4263	0.4549	444	718.12	0.6188	0.0015	None significant
HOMEZ_2	24	6.7917	3.2085	0.0991	273	457.912	0.5971	0.003	None significant
HOXA10_1	34	40.1069	0.8514	0.5237	608	2518.57	0.2417	0.0001	None significant
HOXA10_2	14	15.9151	0.8868	0.5787	440	1032.27	0.4268	0.0001	None significant
HOXA10_3	35	30.64	1.1378	0.3482	515	1977.01	0.2609	0.0001	None significant
HOXA11_1	18	21.3826	0.8489	0.5842	675	1395.25	0.4842	0.0001	None significant
HOXA11_2	14	12.9209	1.0775	0.3273	477	826.562	0.5776	0.0001	None significant
HOXA11_3	24	31.9724	0.7582	0.4164	658	2060.28	0.3197	0.0001	None significant
HOXA13_1	32	23.7335	1.3342	0.3793	717	1504.42	0.4769	0.0001	None significant
HOXA13_2	10	27.5955	0.3847	0.2009	580	1759.17	0.3301	0.0001	None significant
HOXA13_3	22	18.4107	1.1849	0.4611	618	1185.48	0.5217	0.0001	None significant
HOXA13_4	10	28.4689	0.3733	0.2065	698	1788.92	0.3905	0.0001	None significant
HOXA13_5	11	18.8588	0.6043	0.4504	614	1186.02	0.5181	0.0001	None significant
HOXA1_1	66	29.0282	2.2312	0.0675	554	1917.38	0.2893	0.0001	None significant
HOXA1_2	30	16.324	1.7894	0.2087	396	1062.31	0.3734	0.0001	None significant
HOXA2_1	66	34.5512	1.8846	0.1054	492	2194.79	0.2245	0.0001	None significant
HOXA2_2	70	24.7408	2.7583	0.006	865	1563.29	0.5536	0.0001	None significant
HOXA2_3	50	21.4648	2.2702	0.0465	591	1320	0.4481	0.0001	None significant
HOXA3_1	18	20.0552	0.9024	0.5688	1091	1263.87	0.8633	0.0526	None significant
HOXA3_2	50	24.648	1.9885	0.1169	450	1591.06	0.2833	0.0001	None significant
HOXA3_3	42	24.6691	1.6752	0.2238	452	1597.25	0.2834	0.0001	None significant
HOXA4_1	32	11.8038	2.5774	0.0525	237	754.472	0.315	0.0001	None significant
HOXA4_2	0	28.9295	0.0334	0.1478	452	1799.21	0.2516	0.0001	None significant
HOXA5_1	60	144.437	0.4194	0.0774	7518	9047.97	0.8309	0.0001	None significant
HOXA5_2	16	12.3764	1.2709	0.437	456	799.498	0.5709	0.0001	None significant
HOXA5_3	64	34.5946	1.8261	0.1455	506	2116.99	0.2394	0.0001	None significant
HOXA6_1	52	30.1886	1.6993	0.1437	477	1899.91	0.2515	0.0001	None significant
HOXA7_1	7	14.4145	0.519	0.3677	796	923.504	0.8621	0.0585	None significant
HOXA7_2	34	27.6029	1.2237	0.4308	667	1707.56	0.391	0.0001	None significant
HOXA7_3	18	23.8639	0.7642	0.5154	591	1534.55	0.3855	0.0001	None significant
HOXA9_1	68	41.5214	1.6227	0.191	688	2738.57	0.2515	0.0001	None significant
HOXB13_1	16	41.0418	0.4044	0.2207	983	2641.38	0.3724	0.0001	None significant
HOXB13_2	20	25.6526	0.7879	0.487	590	1740.48	0.3394	0.0001	None significant
HOXB13_3	11	19.5317	0.5845	0.4111	574	1246.02	0.4611	0.0001	None significant
HOXB2_1	60	23.3423	2.5059	0.0225	548	1462.03	0.3752	0.0001	None significant
HOXB3_1	85	51.1596	1.6488	0.1487	1203	3267.37	0.3684	0.0001	None significant
HOXB3_2	30	30.4258	0.9865	0.5885	759	1941.69	0.3912	0.0001	None significant
HOXB4_1	18	27.7234	0.6615	0.475	448	1749.49	0.2565	0.0001	None significant
HOXB5_1	64	30.877	2.0391	0.1062	475	2002.44	0.2376	0.0001	None significant
HOXB5_2	40	21.3108	1.8377	0.1425	377	1331.64	0.2836	0.0001	None significant
HOXB6_1	64	27.1497	2.3091	0.0732	774	1711.31	0.4526	0.0001	None significant
HOXB7_1	18	24.6118	0.7418	0.5222	381	1536.71	0.2484	0.0001	None significant
HOXB8_1	64	35.3069	1.7903	0.1564	516	2255.17	0.2291	0.0001	None significant
HOXB9_1	48	47.9087	1.0019	0.5496	982	3070.46	0.32	0.0001	None significant
HOXC10_1	18	21.4831	0.8451	0.5605	749	1415.7	0.5294	0.0001	None significant
HOXC10_2	21	31.4327	0.6783	0.373	463	1994.36	0.2325	0.0001	None significant
HOXC10_3	32	28.1139	1.1335	0.3481	487	1787.3	0.2729	0.0001	None significant
HOXC10_4	32	15.5242	1.9971	0.0706	347	948.531	0.3665	0.0001	None significant
HOXC10_5	32	16.5697	1.8782	0.0735	352	1050.91	0.3356	0.0001	None significant
HOXC10_6	32	27.3825	1.1627	0.3181	393	1740.61	0.2262	0.0001	None significant
HOXC11_1	18	19.9467	0.9071	0.6226	687	1313.17	0.5235	0.0001	None significant
HOXC11_2	24	13.6971	1.701	0.144	415	885.502	0.4693	0.0001	None significant
HOXC11_3	24	35.9247	0.6771	0.3523	543	2152.69	0.2526	0.0001	None significant
HOXC11_4	13	10.7809	1.1884	0.2921	442	700.179	0.6318	0.0001	None significant
HOXC11_5	35	33.6563	1.0388	0.3969	625	2131.02	0.2936	0.0001	None significant
HOXC12_1	19	17.9471	1.0556	0.305	793	1178.13	0.6734	0.0015	None significant
HOXC12_2	20	24.0518	0.8383	0.4881	394	1514.4	0.2607	0.0001	None significant
HOXC12_3	13	11.5985	1.1112	0.3083	441	754.646	0.5849	0.0001	None significant
HOXC13_1	32	27.4206	1.1611	0.4557	607	1781.04	0.3412	0.0001	None significant
HOXC13_2	20	27.9389	0.7257	0.4462	564	1720.04	0.3283	0.0001	None significant
HOXC13_3	11	19.0272	0.5992	0.4355	607	1262.58	0.4812	0.0001	None significant
HOXC4_1	32	25.2175	1.2587	0.4125	385	1585.66	0.2433	0.0001	None significant
HOXC5_1	17	26.6365	0.6513	0.4415	444	1745.09	0.2549	0.0001	None significant
HOXC6_1	34	27.1353	1.244	0.4141	402	1588.92	0.2535	0.0001	None significant
HOXC8_1	50	28.4489	1.7318	0.1488	438	1699.76	0.2581	0.0001	None significant
HOXC9_1	80	39.3637	2.0068	0.0675	676	2583	0.262	0.0001	None significant
HOXD10_1	0	47.5323	0.0206	0.0465	476	2846.27	0.1675	0.0001	None significant
HOXD11_1	19	20.9466	0.9113	0.6445	637	1260.37	0.5058	0.0001	None significant
HOXD11_2	22	11.006	1.9157	0.114	385	649.279	0.5936	0.0001	None significant
HOXD11_3	32	31.5153	1.0149	0.4148	528	1977.71	0.2673	0.0001	None significant
HOXD12_1	19	17.1873	1.0997	0.3069	584	1085.13	0.5386	0.0001	None significant
HOXD12_2	20	19.6091	1.019	0.3952	322	1294.15	0.2494	0.0001	None significant
HOXD12_3	13	10.7368	1.1928	0.2854	451	723.112	0.6242	0.0015	None significant
HOXD13_1	0	42.2129	0.0231	0.0443	800	2661.17	0.3009	0.0001	None significant
HOXD13_2	22	27.331	0.8118	0.4773	502	1738.35	0.2892	0.0001	None significant
HOXD13_3	22	18.4698	1.1813	0.4521	618	1169.75	0.5287	0.0001	None significant
HOXD13_4	12	25.9136	0.483	0.2375	520	1648.75	0.3158	0.0001	None significant
HOXD13_5	13	20.1174	0.663	0.4374	486	1330.26	0.3658	0.0001	None significant
HOXD1_1	51	29.3865	1.7113	0.2228	637	1938.31	0.329	0.0001	None significant
HOXD3_1	112	37.9552	2.9008	0.0059	661	2449.38	0.2702	0.0001	None significant
HOXD3_2	30	19.734	1.4951	0.2892	396	1218.43	0.3256	0.0001	None significant
HOXD8_1	34	37.294	0.914	0.5433	305	2313.14	0.1322	0.0001	None significant
HOXD9_1	27	26.0306	1.0359	0.5217	604	1684.41	0.359	0.0001	None significant
HOXD9_2	50	26.6074	1.8473	0.111	360	1692.76	0.2131	0.0001	None significant
HOXD9_3	11	9.9907	1.0918	0.3198	464	649.55	0.7148	0.006	None significant
HSF2_1	10	18.8877	0.5531	0.3989	1571	1246.2	1.2604	0.0014	Only significant in TCs in accessible promoters
HSF2_2	56	50.6969	1.1026	0.3843	2864	3146.47	0.9103	0.075	None significant
HSF4_1	82	53.7751	1.5153	0.1563	3848	3425.73	1.1232	0.0209	None significant
HSFY2_1	0	7.8327	0.1132	0.5523	480	503.2	0.954	0.3956	None significant
HSFY2_2	0	4.8813	0.17	0.5693	484	308.572	1.5667	0.0014	Only significant in TCs in accessible promoters
HSFY2_3	15	7.59	1.8626	0.3752	836	449.901	1.8563	0.0001	Only significant in TCs in accessible promoters
HSF_known1	10	23.5429	0.4482	0.2878	1983	1494.19	1.3269	0.0001	Only significant in TCs in accessible promoters
HSF_known2	179	123.291	1.4482	0.096	11737	8028.7	1.4618	0.0001	Only significant in TCs in accessible promoters
HSF_known3	180	149.007	1.2066	0.2469	14322	9447.9	1.5158	0.0001	Only significant in TCs in accessible promoters
HSF_known4	95	45.1043	2.0822	0.0194	3263	2948.53	1.1066	0.0584	None significant
HSF_known5	69	45.2313	1.5141	0.1582	2621	2845.59	0.9211	0.12	None significant
ID4_1	323	228.671	1.4107	0.0225	12271	14624.7	0.8391	0.0001	None significant
IKZF1_1	160	107.439	1.4847	0.0765	7255	6868.26	1.0563	0.0844	None significant
IKZF1_2	180	147.359	1.22	0.1931	9843	9317.84	1.0564	0.0254	None significant
IKZF2_1	129	121.65	1.0599	0.4051	10170	7839.01	1.2973	0.0001	Only significant in TCs in accessible promoters
IKZF2_2	33	34.5393	0.9567	0.5611	1190	2226.38	0.5347	0.0001	None significant
IKZF2_3	69	63.8942	1.0787	0.3753	1873	4122.86	0.4544	0.0001	None significant
IKZF3_1	159	77.0382	2.0503	0.0135	3960	5091.25	0.7778	0.0001	None significant
INSM1_1	445	357.35	1.2446	0.0914	31617	22550.8	1.402	0.0001	Only significant in TCs in accessible promoters
IRF4_1	30	24.0129	1.2394	0.4351	3286	1621.96	2.0253	0.0001	Only significant in TCs in accessible promoters
IRF4_2	60	46.2606	1.2907	0.301	4554	3039.86	1.4979	0.0001	Only significant in TCs in accessible promoters
IRF6_1	51	24.7825	2.0169	0.1304	3895	1681.22	2.316	0.0001	Only significant in TCs in accessible promoters
IRF_known1	114	70.3944	1.6108	0.078	2843	4423.25	0.6428	0.0001	None significant
IRF_known10	36	91.005	0.4022	0.0856	6077	5838.73	1.0408	0.2266	None significant
IRF_known11	84	76.6397	1.0948	0.4096	7313	4938.36	1.4808	0.0001	Only significant in TCs in accessible promoters
IRF_known12	30	24.8697	1.1983	0.4342	3373	1698.44	1.9854	0.0001	Only significant in TCs in accessible promoters
IRF_known13	90	40.4386	2.196	0.0496	2741	2616.08	1.0477	0.273	None significant
IRF_known14	77	162.697	0.4765	0.069	14623	10456	1.3985	0.0001	Only significant in TCs in accessible promoters
IRF_known15	126	52.993	2.3522	0.0119	6330	3312.12	1.9109	0.0001	Only significant in TCs in accessible promoters
IRF_known16	22	22.4144	0.9823	0.6207	2972	1402	2.119	0.0001	Only significant in TCs in accessible promoters
IRF_known17	16	59.5036	0.281	0.0603	3615	3785.16	0.9551	0.2379	None significant
IRF_known18	15	30.8766	0.5019	0.171	1546	1952.63	0.7919	0.0045	None significant
IRF_known19	42	56.7045	0.7452	0.3574	4090	3610.33	1.1328	0.0143	None significant
IRF_known2	74	72.1784	1.0249	0.4344	4033	4520.76	0.8921	0.018	None significant
IRF_known20	42	51.2133	0.8235	0.4633	4951	3308.51	1.4963	0.0001	Only significant in TCs in accessible promoters
IRF_known21	36	55.6727	0.6529	0.2994	4322	3583.84	1.2059	0.0001	Only significant in TCs in accessible promoters
IRF_known3	203	124.072	1.6311	0.042	6979	7945.52	0.8784	0.0029	None significant
IRF_known4	111	82.6216	1.3394	0.2336	6163	5316.35	1.1592	0.0014	Only significant in TCs in accessible promoters
IRF_known5	96	75.3571	1.2703	0.2559	3529	4829.65	0.7308	0.0001	None significant
IRF_known6	25	31.9154	0.7899	0.3567	1081	2088.71	0.5178	0.0001	None significant
IRF_known7	75	154.189	0.4897	0.0376	8288	9825.55	0.8435	0.0001	None significant
IRF_known8	44	107.339	0.4154	0.027	5197	6905.19	0.7527	0.0001	None significant
IRF_known9	72	74.9726	0.9609	0.5118	4269	4917.65	0.8681	0.0045	None significant
IRX2_1	35	29.6185	1.1758	0.3881	298	1888.78	0.1582	0.0001	None significant
IRX2_2	24	28.0693	0.86	0.5399	902	1830.34	0.4931	0.0001	None significant
IRX3_1	18	27.0645	0.677	0.4869	373	1748.3	0.2138	0.0001	None significant
IRX3_2	18	25.2907	0.7227	0.5243	338	1683.25	0.2013	0.0001	None significant
IRX3_3	12	28.8016	0.4362	0.2649	465	1836.41	0.2536	0.0001	None significant
IRX4_1	18	30.545	0.6023	0.421	381	1945.41	0.1963	0.0001	None significant
IRX5_1	35	28.4968	1.2205	0.3748	299	1761.72	0.1702	0.0001	None significant
IRX5_2	36	28.0472	1.2738	0.3585	770	1827.72	0.4216	0.0001	None significant
IRX6_1	18	28.6389	0.641	0.4592	304	1862.08	0.1637	0.0001	None significant
ISL2_1	64	37.5384	1.6866	0.1685	415	2341.92	0.1776	0.0001	None significant
ISL2_2	48	28.0859	1.6847	0.1384	688	1744.43	0.3947	0.0001	None significant
ISX_1	16	21.7191	0.7483	0.5613	813	1359.55	0.5983	0.0001	None significant
ISX_2	39	20.9928	1.8188	0.1689	139	1325.81	0.1055	0.0001	None significant
ISX_3	24	14.2785	1.6363	0.2449	429	907.953	0.4731	0.0001	None significant
ISX_4	16	11.4772	1.3625	0.4169	296	699.411	0.424	0.0001	None significant
ITGB2_1	137	150.468	0.9111	0.3693	10247	9510.14	1.0775	0.003	Only significant in TCs in accessible promoters
J4118	192	125.48	1.5259	0.0663	12056	7959.72	1.5146	0.0001	Only significant in TCs in accessible promoters
J4123	50	48.1105	1.0385	0.4926	6719	3110.75	2.1596	0.0001	Only significant in TCs in accessible promoters
J4128	21	32.0686	0.6653	0.3211	4285	2082	2.0576	0.0001	Only significant in TCs in accessible promoters
J4133	60	37.5409	1.5827	0.1399	2991	2387.97	1.2524	0.0014	Only significant in TCs in accessible promoters
J4138	355	87.8764	4.0056	0.0001	7511	5463.24	1.3748	0.0001	Both significant
J4143	39	95.6554	0.4138	0.0345	16008	6121.01	2.615	0.0001	Only significant in TCs in accessible promoters
J4148	161	310.375	0.5203	0.0135	45713	19590.2	2.3334	0.0001	Only significant in TCs in accessible promoters
J4153	118	79.5369	1.4776	0.0946	2709	5120.78	0.5291	0.0001	None significant
J4158	234	101.751	2.2871	0.0001	5346	6613.9	0.8083	0.0001	Only significant in TCs in accessible enhancers
J4163	102	56.0664	1.8049	0.0149	1608	3532.76	0.4553	0.0001	None significant
J4168	210	169.062	1.2407	0.1951	7558	10977.3	0.6885	0.0001	None significant
J4173	347	311.793	1.1126	0.2754	36535	19985.2	1.8281	0.0001	Only significant in TCs in accessible promoters
J4178	307	408.995	0.7512	0.0567	45167	26074.7	1.7322	0.0001	Only significant in TCs in accessible promoters
J4183	320	485.236	0.6602	0.006	54583	31098.1	1.7552	0.0001	Only significant in TCs in accessible promoters
J4188	72	100.578	0.7187	0.2259	11805	6244.78	1.8902	0.0001	Only significant in TCs in accessible promoters
J4193	44	78.2265	0.568	0.1575	3520	5096.15	0.6908	0.0001	None significant
J4198	119	162.634	0.7333	0.2116	8668	10270.6	0.844	0.0001	None significant
J4203	127	196.972	0.6466	0.1032	12789	12400.8	1.0313	0.2048	None significant
J4208	84	61.7644	1.3543	0.2311	5946	3892.91	1.5273	0.0001	Only significant in TCs in accessible promoters
J4213	102	112.945	0.9039	0.4199	14013	7301.23	1.9191	0.0001	Only significant in TCs in accessible promoters
J4218	37	66.69	0.5614	0.1225	21977	4235.28	5.188	0.0001	Only significant in TCs in accessible promoters
J4223	13	10.4078	1.2272	0.2353	469	689.909	0.6803	0.0015	None significant
J4228	20	19.8636	1.0065	0.4174	257	1257.84	0.2049	0.0001	None significant
JDP2_1	97	59.8124	1.6115	0.1132	7851	3705.58	2.1184	0.0001	Only significant in TCs in accessible promoters
JDP2_2	126	72.3535	1.7313	0.0255	878	4693.56	0.1872	0.0001	None significant
JDP2_3	110	39.2462	2.758	0.0001	4685	2436.97	1.9221	0.0001	Both significant
JDP2_4	110	82.4724	1.3298	0.1479	882	5345.14	0.1652	0.0001	None significant
JDP2_5	134	39.4811	3.3349	0.0001	4750	2555.27	1.8586	0.0001	Both significant
JDP2_6	110	80.8912	1.3555	0.1326	812	5257.17	0.1546	0.0001	None significant
JDP2_7	110	40.8878	2.6499	0.0014	4702	2578.47	1.8232	0.0001	Only significant in TCs in accessible promoters
KLF12_1	113	105.37	1.0717	0.3852	10102	6744.87	1.4977	0.0001	Only significant in TCs in accessible promoters
KLF12_2	417	480.399	0.8683	0.2395	55676	30402	1.8313	0.0001	Only significant in TCs in accessible promoters
KLF13_1	113	287.885	0.3946	0.0001	33362	18365	1.8166	0.0001	Only significant in TCs in accessible promoters
KLF14_1	390	593.175	0.6581	0.018	80673	37671.1	2.1415	0.0001	Only significant in TCs in accessible promoters
LBX2_1	17	24.4882	0.7062	0.4507	576	1552.97	0.3713	0.0001	None significant
LBX2_2	52	33.2699	1.5465	0.2145	1604	2082.38	0.7704	0.0001	None significant
LBX2_3	40	20.0806	1.9449	0.117	563	1248.74	0.4513	0.0001	None significant
LHX1_1	0	28.6737	0.0337	0.1529	260	1734.49	0.1504	0.0001	None significant
LHX2_1	17	27.6863	0.6275	0.4151	642	1768.23	0.3634	0.0001	None significant
LHX2_2	10	15.8415	0.6531	0.4698	293	1051.7	0.2793	0.0001	None significant
LHX2_3	0	22.7974	0.042	0.1814	256	1424.56	0.1803	0.0001	None significant
LHX3_1	10	16.7337	0.6203	0.4409	156	1077.55	0.1456	0.0001	None significant
LHX3_2	39	26.4228	1.4586	0.281	237	1676.24	0.1419	0.0001	None significant
LHX3_3	18	26.1423	0.7	0.5057	309	1691.19	0.1832	0.0001	None significant
LHX4_1	34	33.1664	1.0244	0.5351	941	2138.12	0.4404	0.0001	None significant
LHX4_2	8	10.0497	0.8145	0.6162	136	662.673	0.2064	0.0001	None significant
LHX5_1	0	24.5105	0.0392	0.2319	247	1658.61	0.1494	0.0001	None significant
LHX6_1	18	27.5825	0.6647	0.4761	738	1681.95	0.4391	0.0001	None significant
LHX6_2	0	32.3578	0.03	0.1095	2145	2139.47	1.0026	0.4795	None significant
LHX6_3	0	10.377	0.0879	0.3158	170	714.52	0.239	0.0001	None significant
LHX6_4	1	25.2839	0.0761	0.1543	448	1528.79	0.2935	0.0001	None significant
LHX6_5	12	20.699	0.5991	0.4374	461	1298.94	0.3554	0.0001	None significant
LHX8_1	34	48.0993	0.7128	0.3312	3519	3008.45	1.1696	0.0104	None significant
LHX8_2	2	20.9504	0.1367	0.2753	473	1356.27	0.3492	0.0001	None significant
LHX8_3	8	10.3072	0.796	0.604	304	669.592	0.4548	0.0001	None significant
LHX8_4	12	15.8692	0.7706	0.59	197	979.395	0.202	0.0001	None significant
LHX9_1	17	26.6208	0.6517	0.4532	503	1736.32	0.2901	0.0001	None significant
LHX9_2	32	14.9491	2.0691	0.1109	391	953.198	0.4108	0.0001	None significant
LHX9_3	26	24.2025	1.0713	0.5185	310	1544.81	0.2012	0.0001	None significant
LMO2_1	405	349.632	1.1579	0.1953	21376	22335.1	0.9571	0.033	None significant
LMO2_2	54	23.3518	2.2586	0.045	1392	1480.48	0.9403	0.186	None significant
LMX1A_1	0	27.8372	0.0347	0.1431	332	1744.83	0.1907	0.0001	None significant
LMX1A_2	8	10.0728	0.8128	0.6019	136	661.857	0.2067	0.0001	None significant
LMX1B_1	0	24.1895	0.0397	0.2209	234	1575.91	0.149	0.0001	None significant
LMX1B_2	16	10.8603	1.4334	0.3618	134	726.203	0.1856	0.0001	None significant
LMX1B_3	16	11.8693	1.321	0.4063	312	761.057	0.4107	0.0001	None significant
MA0007.2	275	154.418	1.7759	0.0104	5614	9683.36	0.5798	0.0001	None significant
MA0014.2	626	580.493	1.0783	0.3283	66750	37173.1	1.7956	0.0001	Only significant in TCs in accessible promoters
MA0024.2	252	483.402	0.5223	0.0001	76878	30850.4	2.4919	0.0001	Only significant in TCs in accessible promoters
MA0035.3	55	45.3017	1.2095	0.3408	1334	2895.59	0.4609	0.0001	None significant
MA0036.2	56	52.5896	1.0636	0.4648	1323	3325.34	0.398	0.0001	None significant
MA0037.2	8	18.4384	0.463	0.2921	444	1195.93	0.3718	0.0001	None significant
MA0050.2	192	243.544	0.7892	0.231	13617	15922.7	0.8552	0.0001	None significant
MA0052.2	90	59.4649	1.505	0.1721	1083	3862.54	0.2806	0.0001	None significant
MA0058.2	126	83.8211	1.4973	0.09	3143	5384.97	0.5837	0.0001	None significant
MA0060.2	306	161.841	1.8853	0.0088	16740	10245.1	1.6339	0.0001	Only significant in TCs in accessible promoters
MA0076.2	129	174.329	0.7415	0.1568	38999	11075.5	3.521	0.0001	Only significant in TCs in accessible promoters
MA0080.3	368	375.303	0.9806	0.4907	36580	24089.9	1.5185	0.0001	Only significant in TCs in accessible promoters
MA0083.2	99	75.8063	1.302	0.2403	2984	4969.27	0.6006	0.0001	None significant
MA0093.2	164	108.799	1.5028	0.0592	7758	6972.56	1.1126	0.0014	Only significant in TCs in accessible promoters
MA0095.2	96	107.577	0.8934	0.4206	16754	6676.98	2.509	0.0001	Only significant in TCs in accessible promoters
MA0098.2	389	445.556	0.8734	0.2381	51923	28512.8	1.821	0.0001	Only significant in TCs in accessible promoters
MA0100.2	149	89.5676	1.6562	0.0344	3688	5643.93	0.6535	0.0001	None significant
MA0102.3	39	36.9597	1.0537	0.445	921	2383.67	0.3866	0.0001	None significant
MA0103.2	219	141.08	1.5484	0.0255	8649	8859.99	0.9762	0.2434	None significant
MA0104.3	91	62.3285	1.4527	0.1215	3874	3839.65	1.0089	0.4255	None significant
MA0105.3	160	145.006	1.1027	0.3428	9709	9035.44	1.0745	0.0135	None significant
MA0106.2	201	113.732	1.7606	0.021	5462	7320.78	0.7461	0.0001	None significant
MA0113.2	203	121.757	1.6618	0.0285	5299	7862.85	0.674	0.0001	None significant
MA0114.2	295	259.632	1.1357	0.2605	14229	16501.9	0.8623	0.0001	None significant
MA0137.3	122	88.6156	1.3725	0.1465	5550	5688.81	0.9756	0.2985	None significant
MA0140.2	100	80.4343	1.2403	0.2911	2878	5246.59	0.5486	0.0001	None significant
MA0141.2	103	144.11	0.7167	0.1635	7648	9157.92	0.8351	0.0001	None significant
MA0143.3	24	46.37	0.5278	0.1415	2114	3010.62	0.7023	0.0001	None significant
MA0144.2	144	120.584	1.1926	0.2573	6826	7655.17	0.8917	0.0015	None significant
MA0145.2	492	419.588	1.1722	0.1755	42057	26707.2	1.5747	0.0001	Only significant in TCs in accessible promoters
MA0147.2	120	89.724	1.3337	0.1522	4184	5729.81	0.7303	0.0001	None significant
MA0148.3	172	114.267	1.5009	0.0975	1815	7638.84	0.2377	0.0001	None significant
MA0150.2	375	202.604	1.8467	0.0029	8274	13020.8	0.6355	0.0001	None significant
MA0154.2	313	334.298	0.9365	0.3817	20319	21127.2	0.9617	0.0395	None significant
MA0258.2	386	305.146	1.2641	0.1288	21686	19250	1.1265	0.0001	Only significant in TCs in accessible promoters
MA0461.1	243	157.959	1.535	0.0165	7682	10068.9	0.763	0.0001	None significant
MA0462.1	199	127.822	1.5525	0.0239	1450	8350.03	0.1738	0.0001	None significant
MA0463.1	277	149.931	1.8419	0.0059	7356	9483.8	0.7757	0.0001	None significant
MA0464.1	137	123.289	1.1103	0.3495	7878	7712.07	1.0215	0.2902	None significant
MA0465.1	35	36.0054	0.9728	0.5533	497	2277.6	0.2186	0.0001	None significant
MA0466.1	26	36.2612	0.7246	0.3542	933	2226.77	0.4193	0.0001	None significant
MA0468.1	34	27.7337	1.2181	0.2849	624	1780.97	0.3507	0.0001	None significant
MA0470.1	244	504.825	0.4844	0.0001	81199	32143.3	2.5261	0.0001	Only significant in TCs in accessible promoters
MA0471.1	334	498.27	0.671	0.0135	64423	31913.5	2.0186	0.0001	Only significant in TCs in accessible promoters
MA0473.1	254	270.221	0.9402	0.3901	38950	17071.8	2.2815	0.0001	Only significant in TCs in accessible promoters
MA0474.1	210	274.798	0.7651	0.1111	26962	17458	1.5444	0.0001	Only significant in TCs in accessible promoters
MA0475.1	199	241.945	0.8232	0.2006	34092	15483.1	2.2018	0.0001	Only significant in TCs in accessible promoters
MA0476.1	359	146.618	2.4387	0.0001	2132	9438.57	0.226	0.0001	Only significant in TCs in accessible enhancers
MA0477.1	428	172.054	2.479	0.0001	4890	11106.8	0.4403	0.0001	Only significant in TCs in accessible enhancers
MA0478.1	414	177.704	2.3223	0.0001	4820	11448.3	0.4211	0.0001	Only significant in TCs in accessible enhancers
MA0479.1	98	47.9688	2.0217	0.03	1667	3083.78	0.5407	0.0001	None significant
MA0480.1	187	84.67	2.1945	0.0014	2719	5490.19	0.4953	0.0001	None significant
MA0481.1	193	141.417	1.3622	0.1224	3705	8924.79	0.4152	0.0001	None significant
MA0482.1	44	46.0109	0.9572	0.5273	1390	2918.89	0.4764	0.0001	None significant
MA0483.1	100	92.1569	1.0842	0.378	3278	5763.22	0.5689	0.0001	None significant
MA0484.1	267	237.445	1.1239	0.293	12732	15193.3	0.838	0.0001	None significant
MA0485.1	26	38.643	0.6811	0.3818	1025	2402.14	0.4269	0.0001	None significant
MA0486.1	189	134.718	1.4	0.1231	10203	8739.53	1.1674	0.0001	Only significant in TCs in accessible promoters
MA0488.1	177	84.7072	2.0768	0.0074	4752	5429.46	0.8752	0.0015	None significant
MA0490.1	389	168.506	2.3008	0.0001	3154	10815.1	0.2917	0.0001	Only significant in TCs in accessible enhancers
MA0491.1	348	143.995	2.407	0.0001	2228	9290.87	0.2399	0.0001	Only significant in TCs in accessible enhancers
MA0492.1	389	165.337	2.3446	0.0001	3154	10820.2	0.2916	0.0001	Only significant in TCs in accessible enhancers
MA0493.1	412	444.228	0.9276	0.3326	45004	28056.5	1.604	0.0001	Only significant in TCs in accessible promoters
MA0494.1	257	227.755	1.1278	0.3083	13305	14450	0.9208	0.006	None significant
MA0495.1	297	159.788	1.8534	0.0105	3607	10197.1	0.3538	0.0001	None significant
MA0496.1	232	122.915	1.8803	0.004	2716	7868.49	0.3453	0.0001	None significant
MA0497.1	75	68.8799	1.0876	0.4454	1241	4496.68	0.2761	0.0001	None significant
MA0498.1	507	248.538	2.0358	0.0001	13744	15887.5	0.8651	0.0001	Only significant in TCs in accessible enhancers
MA0500.1	469	300.528	1.5587	0.0059	20458	19060.4	1.0733	0.0001	Only significant in TCs in accessible promoters
MA0501.1	259	172.44	1.4991	0.0554	4391	10766.8	0.4079	0.0001	None significant
MA0502.1	210	117.763	1.7766	0.0284	12288	7522.12	1.6335	0.0001	Only significant in TCs in accessible promoters
MA0503.1	412	446.643	0.9226	0.3185	45004	28051	1.6043	0.0001	Only significant in TCs in accessible promoters
MA0504.1	438	516.506	0.8483	0.1848	51201	33094.3	1.5471	0.0001	Only significant in TCs in accessible promoters
MA0505.1	306	236.194	1.2943	0.1239	13235	15023.5	0.881	0.0001	None significant
MA0506.1	164	459.481	0.3583	0.0001	78663	29405.7	2.675	0.0001	Only significant in TCs in accessible promoters
MA0507.1	26	50.9173	0.5201	0.2164	879	3189.52	0.2758	0.0001	None significant
MA0508.1	176	222.821	0.7908	0.224	12910	14111.6	0.9149	0.0034	None significant
MA0509.1	443	181.048	2.4389	0.0001	17165	11781.5	1.4569	0.0001	Both significant
MA0510.1	746	382.102	1.9499	0.0001	31032	24241	1.2801	0.0001	Both significant
MA0511.1	434	227.924	1.9002	0.0001	12443	14645.7	0.8496	0.0001	Only significant in TCs in accessible enhancers
MA0512.1	200	189.912	1.0528	0.3998	8745	12017.1	0.7277	0.0001	None significant
MA0513.1	383	261.716	1.4617	0.0224	15068	16580.6	0.9088	0.0001	None significant
MA0514.1	70	106.495	0.6605	0.1494	5017	6753.33	0.7429	0.0001	None significant
MA0515.1	24	67.0192	0.3675	0.0369	2588	4333.14	0.5974	0.0001	None significant
MA0517.1	136	140.322	0.9694	0.4905	8362	8861.26	0.9437	0.0765	None significant
MA0518.1	159	141.644	1.1217	0.3132	8722	9029.82	0.9659	0.1725	None significant
MA0519.1	105	99.6459	1.0532	0.4202	5574	6328.9	0.8807	0.003	None significant
MA0520.1	120	97.0087	1.2346	0.2776	3833	6100.43	0.6284	0.0001	None significant
MA0521.1	406	282.701	1.4346	0.0179	17739	17815.8	0.9957	0.4117	None significant
MA0522.1	534	363.192	1.469	0.0089	21756	22887.2	0.9506	0.009	None significant
MA0523.1	28	82.2022	0.3485	0.045	2716	5271.85	0.5153	0.0001	None significant
MA0525.1	313	392.274	0.7984	0.1805	30365	24843.6	1.2222	0.0001	Only significant in TCs in accessible promoters
MA0526.1	165	127.071	1.2962	0.1666	7687	8105.97	0.9483	0.069	None significant
MA0527.1	15	196.671	0.0809	0.0001	36128	12589.1	2.8696	0.0001	Only significant in TCs in accessible promoters
MA0591.1	537	265.223	2.0209	0.0001	13762	16980.9	0.8105	0.0001	Only significant in TCs in accessible enhancers
MA0592.1	165	134.226	1.2276	0.1973	7115	8795.14	0.809	0.0001	None significant
MA0593.1	85	71.0678	1.1933	0.3019	1681	4605.52	0.3651	0.0001	None significant
MA0594.1	22	35.2146	0.6351	0.3298	654	2181.57	0.3001	0.0001	None significant
MA0595.1	200	116.574	1.7096	0.0089	7680	7474.53	1.0275	0.2303	None significant
MA0596.1	130	82.8305	1.5627	0.0795	4145	5265.91	0.7872	0.0001	None significant
MA0597.1	237	222.923	1.0629	0.3768	22626	14218.7	1.5912	0.0001	Only significant in TCs in accessible promoters
MA0598.1	176	160.228	1.0978	0.3309	11675	10294.1	1.1341	0.0001	Only significant in TCs in accessible promoters
MA0600.1	745	320.876	2.3177	0.0001	32870	20157.3	1.6306	0.0001	Both significant
MAFF_1	216	120.146	1.7912	0.0194	6343	7458.25	0.8505	0.0015	None significant
MAFG_1	180	109.847	1.6329	0.0812	4830	7061.32	0.6841	0.0001	None significant
MAF_known1	267	255.653	1.0442	0.4266	21247	16447.6	1.2918	0.0001	Only significant in TCs in accessible promoters
MAF_known10	201	86.4781	2.3091	0.0014	2702	5296.47	0.5102	0.0001	None significant
MAF_known11	246	139.637	1.7563	0.0149	9759	8709.56	1.1205	0.0029	Only significant in TCs in accessible promoters
MAF_known12	144	96.9774	1.4799	0.1259	8397	6397.72	1.3124	0.0001	Only significant in TCs in accessible promoters
MAF_known2	349	197.482	1.7634	0.0001	9747	12735.6	0.7654	0.0001	Only significant in TCs in accessible enhancers
MAF_known3	212	96.6488	2.1813	0.0001	8427	6183.79	1.3627	0.0001	Both significant
MAF_known4	260	105.244	2.4566	0.0014	2950	6672.69	0.4422	0.0001	None significant
MAF_known5	181	77.5715	2.3164	0.0014	1424	4898.1	0.2909	0.0001	None significant
MAF_known6	132	89.9397	1.4625	0.1005	2671	5803.71	0.4603	0.0001	None significant
MAF_known7	263	128.294	2.0419	0.0074	7512	8349.14	0.8997	0.0195	None significant
MAF_known8	120	78.1755	1.5283	0.072	2251	4888.57	0.4606	0.0001	None significant
MAF_known9	254	135.199	1.8723	0.0104	10065	8608.95	1.1691	0.0001	Only significant in TCs in accessible promoters
MEF2B_1	48	32.0324	1.4834	0.2365	637	2065.2	0.3088	0.0001	None significant
MEF2D_1	60	34.069	1.7394	0.1265	589	2181.33	0.2704	0.0001	None significant
MEF2_known1	49	56.4063	0.871	0.4762	1171	3615.85	0.324	0.0001	None significant
MEF2_known10	50	40.2632	1.236	0.2845	969	2707.75	0.3581	0.0001	None significant
MEF2_known12	36	37.2959	0.9662	0.5954	598	2419.79	0.2474	0.0001	None significant
MEF2_known2	80	45.8409	1.7293	0.1205	632	2798.79	0.2261	0.0001	None significant
MEF2_known3	178	73.6655	2.3974	0.0104	1662	4782.07	0.3477	0.0001	None significant
MEF2_known4	112	69.3324	1.6067	0.1306	1067	4372.94	0.2442	0.0001	None significant
MEF2_known5	132	77.9432	1.6848	0.1293	1106	4940.79	0.224	0.0001	None significant
MEF2_known6	54	57.1701	0.9455	0.5369	987	3636.47	0.2716	0.0001	None significant
MEF2_known7	80	47.2423	1.679	0.1395	789	2962.02	0.2666	0.0001	None significant
MEF2_known8	32	50.174	0.6449	0.3438	834	3236.15	0.2579	0.0001	None significant
MEF2_known9	86	51.2341	1.6656	0.12	622	3146.6	0.1979	0.0001	None significant
MEIS1_1	186	129.815	1.4295	0.0914	6932	8148.69	0.8507	0.0001	None significant
MEIS1_2	95	93.8746	1.0119	0.5091	3548	6072.93	0.5843	0.0001	None significant
MEIS1_3	111	96.8171	1.145	0.3485	3749	6126.8	0.612	0.0001	None significant
MEIS1_4	86	39.9197	2.1261	0.0074	1949	2562.88	0.7606	0.0001	None significant
MEIS1__HOXA9_1	64	52.267	1.2203	0.3165	1705	3351.16	0.5089	0.0001	None significant
MEIS1__HOXA9_2	56	50.3268	1.1105	0.4428	1301	3166.36	0.4111	0.0001	None significant
MEIS2_1	119	68.0326	1.7383	0.0631	2464	4436.55	0.5555	0.0001	None significant
MEIS2_2	139	83.3106	1.6605	0.0319	4308	5245.11	0.8214	0.0001	None significant
MEIS2_3	14	21.0563	0.6801	0.3969	818	1344.93	0.6085	0.0001	None significant
MEIS3_1	127	100.172	1.2652	0.2618	4382	6415.59	0.6831	0.0001	None significant
MEIS3_2	77	58.1399	1.3189	0.1873	2820	3614.41	0.7803	0.0001	None significant
MEIS3_3	179	101.783	1.7513	0.0149	3857	6440.85	0.5989	0.0001	None significant
MEIS3_4	14	21.4076	0.6694	0.37	818	1354.05	0.6044	0.0001	None significant
MEIS3_5	133	94.3369	1.4055	0.1111	3231	5974.14	0.5409	0.0001	None significant
MEOX1_1	102	38.5704	2.603	0.0179	900	2388.59	0.3771	0.0001	None significant
MEOX1_2	30	18.1255	1.6209	0.2452	436	1151.95	0.379	0.0001	None significant
MEOX2_1	10	18.5809	0.5618	0.3694	350	1141.67	0.3072	0.0001	None significant
MEOX2_2	17	21.1505	0.8126	0.5942	346	1395.1	0.2485	0.0001	None significant
MEOX2_3	17	34.8763	0.5017	0.2629	393	2202.9	0.1788	0.0001	None significant
MEOX2_4	24	9.5328	2.3735	0.105	225	640.733	0.3522	0.0001	None significant
MESP1_1	238	221.676	1.0733	0.3532	15035	14013.1	1.0729	0.0001	Only significant in TCs in accessible promoters
MGA_1	48	40.8804	1.17	0.3787	1943	2525.7	0.7694	0.0001	None significant
MGA_2	0	51.052	0.0192	0.0389	3132	3306.02	0.9474	0.235	None significant
MGA_3	54	57.5263	0.9397	0.5405	4434	3696.84	1.1993	0.0058	None significant
MIXL1_1	20	17.8804	1.1123	0.5096	513	1184.25	0.4337	0.0001	None significant
MLXIPL_1	10	30.2313	0.3522	0.1789	3338	1976.07	1.6889	0.0001	Only significant in TCs in accessible promoters
MLX_1	10	27.7252	0.3829	0.207	3495	1785.28	1.9571	0.0001	Only significant in TCs in accessible promoters
MLX_2	10	28.4008	0.3741	0.2317	3249	1840.85	1.7645	0.0001	Only significant in TCs in accessible promoters
MNT_1	63	46.4412	1.349	0.202	4173	2816.23	1.4816	0.0001	Only significant in TCs in accessible promoters
MNX1_1	66	25.2086	2.5564	0.0437	694	1685.85	0.412	0.0001	None significant
MNX1_2	40	21.9269	1.7883	0.1478	314	1413.22	0.2227	0.0001	None significant
MSC_1	138	111.158	1.2393	0.2153	4441	6941.98	0.6398	0.0001	None significant
MSX1_1	9	18.1607	0.5219	0.3686	968	1164.45	0.8314	0.024	None significant
MSX1_2	16	26.1808	0.6254	0.4551	364	1710.15	0.2133	0.0001	None significant
MSX1_3	54	36.5581	1.4644	0.2568	387	2250.06	0.1724	0.0001	None significant
MSX1_4	56	18.3308	2.9487	0.009	449	1167.61	0.3851	0.0001	None significant
MSX1_5	40	15.8423	2.4343	0.051	508	1030.84	0.4933	0.0001	None significant
MSX2_1	102	33.8961	2.9516	0.0105	1016	2240.82	0.4536	0.0001	None significant
MSX2_2	80	34.1944	2.3015	0.054	362	2230.11	0.1627	0.0001	None significant
MSX2_3	36	35.3515	1.0178	0.5108	465	2350.76	0.1981	0.0001	None significant
MSX2_4	40	16.5165	2.3407	0.0555	508	1023.66	0.4968	0.0001	None significant
MSX2_6	40	15.2056	2.53	0.0437	508	1033.58	0.492	0.0001	None significant
MTF1_1	279	448.606	0.6228	0.0135	54390	28800.4	1.8885	0.0001	Only significant in TCs in accessible promoters
MTF1_2	113	142.924	0.7921	0.2925	16259	8949.73	1.8166	0.0001	Only significant in TCs in accessible promoters
MTF1_3	118	119.966	0.9837	0.5171	10956	7612.9	1.4391	0.0001	Only significant in TCs in accessible promoters
MXI1_known1	249	198.128	1.2555	0.1425	13866	12445.7	1.1141	0.0001	Only significant in TCs in accessible promoters
MYBL1_1	0	13.2854	0.07	0.417	1658	877.029	1.8895	0.0001	Only significant in TCs in accessible promoters
MYBL1_2	0	14.25	0.0656	0.2759	1397	909.527	1.5354	0.0001	Only significant in TCs in accessible promoters
MYBL1_3	22	10.0698	2.0777	0.1838	1082	637.359	1.6965	0.0001	Only significant in TCs in accessible promoters
MYBL1_4	11	9.1912	1.1775	0.5475	996	526.109	1.8914	0.0001	Only significant in TCs in accessible promoters
MYBL1_5	34	32.7818	1.0361	0.5202	4494	2067.95	2.1726	0.0001	Only significant in TCs in accessible promoters
MYBL2_1	0	13.0702	0.0711	0.3352	1741	881.967	1.9729	0.0001	Only significant in TCs in accessible promoters
MYBL2_2	16	21.6535	0.7504	0.5655	2354	1402.84	1.6775	0.0001	Only significant in TCs in accessible promoters
MYBL2_3	0	8.8083	0.102	0.4095	1378	586.349	2.3478	0.0001	Only significant in TCs in accessible promoters
MYBL2_4	27	14.9058	1.7604	0.2645	1784	1002.45	1.7789	0.0001	Only significant in TCs in accessible promoters
MYB_1	267	236.824	1.1269	0.3036	32654	15073.7	2.1662	0.0001	Only significant in TCs in accessible promoters
MYB_2	100	69.1013	1.4408	0.1365	6327	4448.51	1.4222	0.0001	Only significant in TCs in accessible promoters
MYB_3	143	76.7152	1.8529	0.022	7845	4946.02	1.586	0.0001	Only significant in TCs in accessible promoters
MYB_4	108	50.5967	2.1125	0.0105	5417	3308.9	1.6369	0.0001	Only significant in TCs in accessible promoters
MYB_5	40	38.7528	1.0314	0.5029	4613	2421.86	1.9044	0.0001	Only significant in TCs in accessible promoters
MYB_6	2	15.1294	0.186	0.3823	1543	914.27	1.6869	0.0001	Only significant in TCs in accessible promoters
MYCN_1	112	88.5953	1.2612	0.2248	9730	5595.92	1.7386	0.0001	Only significant in TCs in accessible promoters
MYCN_2	153	130.051	1.1751	0.2595	16342	8468.38	1.9297	0.0001	Only significant in TCs in accessible promoters
MYC_known1	114	68.5518	1.6534	0.0584	5745	4307.5	1.3336	0.0001	Only significant in TCs in accessible promoters
MYC_known11	286	212.442	1.3446	0.0853	18303	13588.6	1.3469	0.0001	Only significant in TCs in accessible promoters
MYC_known12	48	30.8051	1.5406	0.1327	2839	1910.8	1.4855	0.0001	Only significant in TCs in accessible promoters
MYC_known13	101	78.2716	1.2867	0.2111	5579	4859.26	1.1481	0.0075	None significant
MYC_known14	173	132.015	1.3081	0.1461	10750	8534.99	1.2595	0.0001	Only significant in TCs in accessible promoters
MYC_known15	71	60.2841	1.1749	0.3307	6069	3954.45	1.5346	0.0001	Only significant in TCs in accessible promoters
MYC_known16	113	79.0614	1.4239	0.1334	5957	4968.21	1.199	0.0001	Only significant in TCs in accessible promoters
MYC_known17	39	29.6051	1.307	0.221	3316	1857.1	1.7852	0.0001	Only significant in TCs in accessible promoters
MYC_known18	143	111.549	1.2794	0.1856	12656	7111.07	1.7797	0.0001	Only significant in TCs in accessible promoters
MYC_known19	172	153.972	1.1163	0.3397	14088	10007.9	1.4076	0.0001	Only significant in TCs in accessible promoters
MYC_known2	86	50.2736	1.6968	0.0777	5435	3140.45	1.7304	0.0001	Only significant in TCs in accessible promoters
MYC_known20	68	113.607	0.6021	0.1636	11115	7358.28	1.5105	0.0001	Only significant in TCs in accessible promoters
MYC_known21	63	44.3746	1.4105	0.188	4166	2798.46	1.4885	0.0001	Only significant in TCs in accessible promoters
MYC_known22	76	46.8991	1.6075	0.1025	4009	3036.93	1.32	0.0001	Only significant in TCs in accessible promoters
MYC_known3	94	71.5423	1.3096	0.227	7590	4512.04	1.682	0.0001	Only significant in TCs in accessible promoters
MYC_known4	99	75.3872	1.3091	0.216	5349	4880.12	1.0961	0.0343	None significant
MYC_known5	137	68.6529	1.9813	0.0209	4431	4538.35	0.9764	0.3258	None significant
MYC_known6	154	118.74	1.2945	0.1605	11591	7645.11	1.5161	0.0001	Only significant in TCs in accessible promoters
MYC_known7	66	53.1267	1.2378	0.248	4992	3427.55	1.4563	0.0001	Only significant in TCs in accessible promoters
MYC_known8	136	190.466	0.7155	0.1066	29847	12105.6	2.4654	0.0001	Only significant in TCs in accessible promoters
MYC_known9	125	82.6153	1.5069	0.1303	9504	5478.88	1.7345	0.0001	Only significant in TCs in accessible promoters
MYF6_1	373	321.211	1.1607	0.2253	18830	20474.5	0.9197	0.0015	None significant
MYF6_2	48	52.2988	0.9193	0.4287	1583	3269.71	0.4843	0.0001	None significant
MYF_1	573	393.765	1.454	0.0044	32225	25080.8	1.2848	0.0001	Only significant in TCs in accessible promoters
MYOD1_1	316	212.867	1.4822	0.0224	12214	13442.3	0.9086	0.0001	None significant
MYOD1_2	322	232.299	1.3845	0.0329	10999	14731.7	0.7466	0.0001	None significant
MYOD1_3	1052	837.25	1.2562	0.0419	72294	53485.4	1.3517	0.0001	Only significant in TCs in accessible promoters
MYOG_1	320	196.725	1.6235	0.0044	10679	12759.4	0.837	0.0001	None significant
MZF1_1	191	232.639	0.8218	0.1394	24686	14889.1	1.6579	0.0001	Only significant in TCs in accessible promoters
MZF1_2	393	455.062	0.8639	0.2102	49117	29266.9	1.6782	0.0001	Only significant in TCs in accessible promoters
MZF1_4	177	249.006	0.712	0.0664	29061	16005	1.8157	0.0001	Only significant in TCs in accessible promoters
NANOG_known1	237	108.826	2.1671	0.0001	6327	6803.76	0.9299	0.0495	Only significant in TCs in accessible enhancers
NEUROD2_1	20	25.092	0.8048	0.482	604	1721.96	0.3511	0.0001	None significant
NEUROG2_1	20	24.1047	0.8365	0.5234	273	1556.76	0.1759	0.0001	None significant
NEUROG2_2	40	44.7226	0.8967	0.469	698	2850.97	0.2451	0.0001	None significant
NFAT5_1	55	69.9531	0.7893	0.2985	2628	4511.98	0.5825	0.0001	None significant
NFATC1_1	99	91.3403	1.083	0.4067	4197	5823.29	0.7208	0.0001	None significant
NFATC1_2	8	42.7228	0.2058	0.0465	2885	2640.26	1.0927	0.1033	None significant
NFATC1_3	111	45.6742	2.3996	0.0179	1788	2893.11	0.6182	0.0001	None significant
NFATC2_1	63	49.9981	1.2549	0.2551	1527	3173.18	0.4814	0.0001	None significant
NFAT_1	158	97.3514	1.6167	0.0447	3670	6142.34	0.5976	0.0001	None significant
NFAT_2	90	72.5297	1.2376	0.2723	3224	4585.6	0.7031	0.0001	None significant
NFE2L1_1	94	73.8522	1.2692	0.2444	3426	4909.62	0.6979	0.0001	None significant
NFE2L1__MAFG_1	230	161.779	1.4191	0.114	5974	10457.2	0.5713	0.0001	None significant
NFE2L2_1	157	166.023	0.946	0.4251	28385	10607	2.6759	0.0001	Only significant in TCs in accessible promoters
NFE2L2_2	326	155.147	2.0942	0.0001	4601	9861.08	0.4666	0.0001	Only significant in TCs in accessible enhancers
NFE2L2_3	184	111.287	1.6476	0.0284	4550	7032.88	0.647	0.0001	None significant
NFE2_known1	264	142.424	1.8477	0.0044	5131	9124.38	0.5624	0.0001	None significant
NFE2_known2	164	91.911	1.7759	0.0134	1533	5934.29	0.2585	0.0001	None significant
NFIA_1	253	175.852	1.4362	0.0853	8362	11168	0.7488	0.0001	None significant
NFIB_1	268	182	1.4699	0.0435	8690	11482.8	0.7568	0.0001	None significant
NFIC_1	579	513.756	1.1267	0.2764	47093	33084.3	1.4234	0.0001	Only significant in TCs in accessible promoters
NFIC_2	540	414.437	1.3022	0.0749	30620	26453	1.1575	0.0001	Only significant in TCs in accessible promoters
NFIC_3	439	283.776	1.5451	0.0149	19024	18344.6	1.037	0.093	None significant
NFIL3_1	12	17.5505	0.7008	0.5234	775	1098.32	0.7059	0.0001	None significant
NFIL3_2	22	18.0895	1.2049	0.4638	592	1165.86	0.5082	0.0001	None significant
NFIL3_3	59	25.4948	2.2646	0.0659	1975	1653.62	1.1942	0.0164	None significant
NFIX_1	344	247.126	1.3904	0.0704	13731	15499.7	0.8859	0.0001	None significant
NFKB_known1	192	199.516	0.9625	0.4676	19551	12760.9	1.5321	0.0001	Only significant in TCs in accessible promoters
NFKB_known10	191	117.498	1.6203	0.042	9970	7527.4	1.3245	0.0001	Only significant in TCs in accessible promoters
NFKB_known11	179	143.312	1.2473	0.2053	12290	9018.59	1.3627	0.0001	Only significant in TCs in accessible promoters
NFKB_known2	101	92.3046	1.0932	0.3851	7459	5859.89	1.2728	0.0001	Only significant in TCs in accessible promoters
NFKB_known3	202	137.476	1.466	0.0405	11526	8743.93	1.3181	0.0001	Only significant in TCs in accessible promoters
NFKB_known4	148	148.125	0.9992	0.5162	10834	9318.79	1.1626	0.0001	Only significant in TCs in accessible promoters
NFKB_known5	145	148.732	0.9751	0.4786	11741	9235.43	1.2713	0.0001	Only significant in TCs in accessible promoters
NFKB_known6	349	300.125	1.1623	0.2299	26597	19304.2	1.3778	0.0001	Only significant in TCs in accessible promoters
NFKB_known7	202	143.412	1.4057	0.075	12156	9059.04	1.3418	0.0001	Only significant in TCs in accessible promoters
NFKB_known9	91	96.2535	0.946	0.4474	6898	6047.38	1.1406	0.0001	Only significant in TCs in accessible promoters
NFY_known1	132	70.1606	1.869	0.0135	6884	4424.56	1.5557	0.0001	Only significant in TCs in accessible promoters
NFY_known2	84	76.5189	1.0965	0.4095	5215	4853.11	1.0746	0.0776	None significant
NFY_known3	227	119.798	1.8874	0.0089	14442	7570.04	1.9077	0.0001	Only significant in TCs in accessible promoters
NFY_known4	113	72.2887	1.5555	0.0779	5315	4588.3	1.1583	0.0014	Only significant in TCs in accessible promoters
NFY_known5	169	94.3358	1.7832	0.024	10236	6047.58	1.6925	0.0001	Only significant in TCs in accessible promoters
NFY_known6	195	119.554	1.6258	0.048	14673	7582.04	1.9351	0.0001	Only significant in TCs in accessible promoters
NHLH1_1	1040	857.795	1.2122	0.0953	88390	54315.4	1.6273	0.0001	Only significant in TCs in accessible promoters
NHLH1_2	721	687.69	1.0484	0.3959	65790	44625.2	1.4743	0.0001	Only significant in TCs in accessible promoters
NHLH1_3	353	296.103	1.1915	0.186	31554	18748.7	1.683	0.0001	Only significant in TCs in accessible promoters
NHLH1_4	334	290.446	1.1494	0.1965	32030	18758	1.7075	0.0001	Only significant in TCs in accessible promoters
NHLH1_5	276	207.075	1.3312	0.0615	17416	13284.6	1.311	0.0001	Only significant in TCs in accessible promoters
NKX1-1_1	188	55.4291	3.3493	0.0001	3716	3371.26	1.1022	0.0539	Only significant in TCs in accessible enhancers
NKX1-2_1	0	31.0534	0.0312	0.141	687	1888.99	0.364	0.0001	None significant
NKX2-1_1	34	37.47	0.9098	0.51	773	2407.68	0.3213	0.0001	None significant
NKX2-1_2	199	201.435	0.988	0.4986	15388	12898.3	1.193	0.0001	Only significant in TCs in accessible promoters
NKX2-1_3	74	87.4043	0.8484	0.3692	3260	5407.22	0.603	0.0001	None significant
NKX2-2_1	20	27.946	0.7255	0.4238	470	1835.99	0.2564	0.0001	None significant
NKX2-2_2	19	78.8173	0.2506	0.033	2568	4960.3	0.5178	0.0001	None significant
NKX2-3_1	81	46.3296	1.7325	0.0863	1677	3033.52	0.553	0.0001	None significant
NKX2-3_2	40	53.9303	0.7464	0.322	1854	3393	0.5466	0.0001	None significant
NKX2-3_3	60	61.8582	0.9704	0.5326	2535	3954.85	0.6411	0.0001	None significant
NKX2-4_1	97	76.077	1.2715	0.2555	2189	4822.6	0.454	0.0001	None significant
NKX2-5_1	21	20.7283	1.0125	0.5417	629	1293.61	0.4866	0.0001	None significant
NKX2-5_2	16	12.9309	1.2203	0.4598	149	837.903	0.1788	0.0001	None significant
NKX2-5_3	75	92.1674	0.8157	0.3067	8270	5935.26	1.3933	0.0001	Only significant in TCs in accessible promoters
NKX2-5_4	7	21.4269	0.3567	0.1561	387	1337.36	0.2899	0.0001	None significant
NKX2-5_5	49	75.4367	0.6541	0.2744	2487	4697.2	0.5296	0.0001	None significant
NKX2-6_1	49	72.3331	0.6818	0.2834	2241	4475.94	0.5008	0.0001	None significant
NKX2-8_1	70	38.545	1.7954	0.1218	910	2486.47	0.3662	0.0001	None significant
NKX2-8_2	50	60.3756	0.8309	0.3564	2656	3725.69	0.713	0.0001	None significant
NKX2-8_3	59	57.3254	1.0287	0.444	2580	3670.81	0.7029	0.0001	None significant
NKX3-1_1	0	16.8207	0.0561	0.2267	135	1095.82	0.124	0.0001	None significant
NKX3-1_3	68	63.7363	1.0659	0.4626	2522	4146.84	0.6083	0.0001	None significant
NKX3-1_4	70	44.7009	1.5536	0.171	942	2909.83	0.324	0.0001	None significant
NKX3-1_5	45	37.1458	1.2059	0.3593	1302	2386.19	0.5458	0.0001	None significant
NKX3-1_6	36	36.9643	0.9746	0.5565	1457	2352.03	0.6196	0.0001	None significant
NKX3-2_1	72	68.5285	1.0499	0.4545	3761	4276.48	0.8795	0.003	None significant
NKX3-2_2	137	66.2532	2.0519	0.03	2022	4246.09	0.4763	0.0001	None significant
NKX3-2_3	27	35.0054	0.7777	0.4026	1211	2226.01	0.5442	0.0001	None significant
NKX6-1_1	78	37.3906	2.0578	0.0525	394	2352.42	0.1678	0.0001	None significant
NKX6-1_2	17	32.5331	0.5368	0.3693	369	2121.56	0.1743	0.0001	None significant
NKX6-1_3	16	32.8489	0.5022	0.334	317	2078.76	0.1529	0.0001	None significant
NKX6-1_4	24	11.9601	1.929	0.1815	155	757.103	0.2058	0.0001	None significant
NKX6-1_5	16	11.0885	1.4063	0.3788	134	726.66	0.1855	0.0001	None significant
NKX6-1_6	16	11.8547	1.3225	0.4216	134	727.95	0.1852	0.0001	None significant
NKX6-2_1	12	25.7551	0.4859	0.3152	361	1609.14	0.2248	0.0001	None significant
NKX6-2_2	16	18.2031	0.8853	0.5724	192	1179.25	0.1635	0.0001	None significant
NKX6-2_3	16	15.4661	1.0324	0.5469	222	977.895	0.2278	0.0001	None significant
NKX6-3_1	17	35.4249	0.4942	0.3141	403	2201.34	0.1834	0.0001	None significant
NOBOX_1	80	19.0923	4.0314	0.0001	364	1234.09	0.2955	0.0001	Only significant in TCs in accessible enhancers
NOBOX_2	18	31.4866	0.5849	0.4068	1769	2135.45	0.8285	0.0225	None significant
NOTO_1	30	20.6825	1.4297	0.313	488	1338.29	0.3651	0.0001	None significant
NR1H4_1	98	63.329	1.539	0.1346	2417	3908.27	0.6185	0.0001	None significant
NR1H4_2	84	59.2104	1.4117	0.1874	2166	3899.37	0.5556	0.0001	None significant
NR1H4_3	84	86.7085	0.9691	0.4968	5452	5553.13	0.9818	0.3374	None significant
NR1H_1	351	275.978	1.2709	0.1319	28664	17544.2	1.6338	0.0001	Only significant in TCs in accessible promoters
NR1H_2	210	160.1	1.3097	0.1527	15875	10218.2	1.5535	0.0001	Only significant in TCs in accessible promoters
NR1H_3	329	304.764	1.0793	0.36	29548	19452.9	1.5189	0.0001	Only significant in TCs in accessible promoters
NR2C2_known1	115	155.599	0.7407	0.1832	10682	9719.94	1.099	0.0014	Only significant in TCs in accessible promoters
NR2E1_1	45	32.6497	1.367	0.2426	846	2072.5	0.4085	0.0001	None significant
NR2E1_2	168	60.231	2.76	0.0029	2176	4015.43	0.542	0.0001	None significant
NR2E1_3	45	31.4048	1.4195	0.2208	801	2060.1	0.3891	0.0001	None significant
NR2E1_4	154	71.9377	2.1251	0.0105	3045	4644.21	0.6557	0.0001	None significant
NR2E1__NFIC_1	332	199.29	1.6626	0.0089	9751	12390	0.787	0.0001	None significant
NR2E3_1	15	17.7265	0.8544	0.5328	716	1138.95	0.629	0.0001	None significant
NR2F2_1	191	191.259	0.9987	0.5296	11732	12036.7	0.9747	0.2295	None significant
NR2F2_2	73	136.256	0.5391	0.077	7981	8557.33	0.9327	0.06	None significant
NR2F6_1	120	112.339	1.0676	0.4215	6122	7206.51	0.8495	0.0001	None significant
NR2F6_2	87	121.419	0.7188	0.2264	7572	7697.32	0.9837	0.3582	None significant
NR2F6_3	129	138.59	0.9313	0.4552	8957	8961.04	0.9995	0.4971	None significant
NR2F6_4	166	102.634	1.6114	0.0584	4815	6578.14	0.732	0.0001	None significant
NR2F6_5	87	87.3536	0.996	0.5389	4645	5623.85	0.826	0.0001	None significant
NR3C1_known1	193	230.6	0.8377	0.2972	9975	14839	0.6722	0.0001	None significant
NR3C1_known10	274	225.91	1.2119	0.238	11979	14279.8	0.8389	0.0001	None significant
NR3C1_known11	128	91.2577	1.3983	0.1232	3655	5791.35	0.6312	0.0001	None significant
NR3C1_known12	136	115.59	1.1751	0.2429	5378	7435.06	0.7234	0.0001	None significant
NR3C1_known13	252	146.924	1.7103	0.0329	13199	9388.07	1.4059	0.0001	Only significant in TCs in accessible promoters
NR3C1_known14	54	85.5635	0.6354	0.2362	4889	5375.82	0.9095	0.0588	None significant
NR3C1_known15	130	69.7808	1.8508	0.054	4967	4401.87	1.1284	0.0209	None significant
NR3C1_known16	130	81.4358	1.5891	0.1036	4882	5284.21	0.9239	0.063	None significant
NR3C1_known17	71	67.4949	1.0512	0.4099	4263	4301.93	0.991	0.4399	None significant
NR3C1_known18	130	58.5432	2.2001	0.0209	2358	3723.05	0.6334	0.0001	None significant
NR3C1_known2	236	134.395	1.7504	0.0179	5249	8479.12	0.6191	0.0001	None significant
NR3C1_known3	131	63.1589	2.0574	0.0178	1999	4077.47	0.4904	0.0001	None significant
NR3C1_known4	190	86.5323	2.1821	0.0029	6261	5596.52	1.1187	0.0104	None significant
NR3C1_known5	96	77.7499	1.2317	0.2572	2372	4862.48	0.4879	0.0001	None significant
NR3C1_known6	286	187.386	1.5235	0.0885	10686	12062.2	0.8859	0.009	None significant
NR3C1_known7	393	236.22	1.6609	0.0247	13776	15211.1	0.9057	0.009	None significant
NR3C1_known8	219	214.547	1.0207	0.4392	10734	13494.5	0.7955	0.0001	None significant
NR3C1_known9	411	229.026	1.7911	0.0134	13503	14873.2	0.9079	0.0135	None significant
NR3C2_1	130	64.7854	1.9913	0.0284	2905	4104.86	0.7078	0.0001	None significant
NR4A_known1	80	62.844	1.2687	0.2105	2767	4039.57	0.6851	0.0001	None significant
NR4A_known2	168	64.6786	2.5731	0.0001	2891	4199.48	0.6885	0.0001	Only significant in TCs in accessible enhancers
NR4A_known3	33	38.4736	0.8613	0.5225	1300	2528.16	0.5144	0.0001	None significant
NR4A_known4	55	54.5292	1.0085	0.5072	1921	3472.91	0.5533	0.0001	None significant
NR5A1_1	48	63.2628	0.7625	0.2926	2788	4025.52	0.6927	0.0001	None significant
NR5A1_2	98	76.7437	1.2734	0.1961	3007	4962.51	0.606	0.0001	None significant
NR5A2_1	179	193.191	0.9269	0.384	13640	12289.7	1.1099	0.0001	Only significant in TCs in accessible promoters
NR6A1_1	108	109.516	0.9863	0.5229	4759	7054.6	0.6746	0.0001	None significant
NRF1_known1	70	103.955	0.6765	0.1675	21369	6606.79	3.2341	0.0001	Only significant in TCs in accessible promoters
NRF1_known2	78	125.173	0.6261	0.114	26613	8082.66	3.2923	0.0001	Only significant in TCs in accessible promoters
NRL_1	164	91.5725	1.7824	0.0109	3381	5776.85	0.5853	0.0001	None significant
OBOX2_1	46	52.1244	0.8847	0.4521	1969	3394.6	0.5802	0.0001	None significant
OBOX3_1	63	52.5553	1.195	0.3437	2352	3358.27	0.7005	0.0001	None significant
OBOX5_1	68	40.4947	1.6629	0.1619	1234	2762.18	0.4469	0.0001	None significant
OBOX5_2	51	43.5941	1.1661	0.4265	1301	2838.5	0.4585	0.0001	None significant
OBOX6_1	45	21.721	2.0246	0.1435	919	1429.37	0.6432	0.0001	None significant
OLIG1_1	0	15.7026	0.0599	0.1727	167	1027.16	0.1634	0.0001	None significant
OLIG2_1	0	14.5112	0.0645	0.2045	167	896.474	0.1872	0.0001	None significant
OLIG2_2	0	15.9014	0.0592	0.1963	237	982.713	0.2419	0.0001	None significant
OLIG3_1	0	20.1917	0.0472	0.1189	400	1266.49	0.3164	0.0001	None significant
ONECUT1_1	12	26.6663	0.4699	0.3134	321	1688.45	0.1906	0.0001	None significant
ONECUT1_2	42	18.1086	2.2503	0.12	191	1142.76	0.1679	0.0001	None significant
ONECUT1_3	28	16.3129	1.6751	0.2925	219	989.123	0.2222	0.0001	None significant
ONECUT2_1	42	17.485	2.3262	0.102	182	1097.12	0.1666	0.0001	None significant
ONECUT3_1	44	24.8788	1.7389	0.1255	278	1636.88	0.1703	0.0001	None significant
OSR1_1	48	95.9338	0.5055	0.0901	7657	6104.2	1.2543	0.0001	Only significant in TCs in accessible promoters
OSR2_1	48	99.6231	0.487	0.0895	8048	6353.34	1.2667	0.0001	Only significant in TCs in accessible promoters
OTP_1	0	20.1863	0.0472	0.2594	191	1290.62	0.1487	0.0001	None significant
OTX1_1	17	44.6517	0.3943	0.1916	1675	2890.43	0.5796	0.0001	None significant
OTX1_2	38	16.4518	2.2347	0.1034	735	1016.27	0.7235	0.0105	None significant
OTX1_3	0	10.621	0.0861	0.2353	829	709.024	1.169	0.0495	None significant
OTX1_4	38	14.9618	2.4433	0.0749	665	991.687	0.6709	0.0045	None significant
OTX1_5	0	10.4752	0.0871	0.2387	749	668.841	1.1197	0.1252	None significant
OTX2_1	17	45.9517	0.3834	0.208	1750	2904.17	0.6027	0.0001	None significant
OTX2_2	38	16.828	2.1876	0.0975	477	1075.83	0.4439	0.0001	None significant
OTX2_3	8	15.2459	0.554	0.3816	761	1018.57	0.7474	0.0001	None significant
OTX_1	24	13.0202	1.7831	0.2134	133	844.214	0.1585	0.0001	None significant
OVOL2_1	210	252.177	0.8334	0.1349	30589	16210.1	1.887	0.0001	Only significant in TCs in accessible promoters
PAX1_2	252	101.045	2.4793	0.0001	11037	6439.21	1.7139	0.0001	Both significant
PAX2_1	162	114.638	1.4096	0.1544	13726	7111.61	1.93	0.0001	Only significant in TCs in accessible promoters
PAX2_2	54	66.2434	0.8179	0.3758	4645	4179.52	1.1113	0.0119	None significant
PAX2_3	24	29.8843	0.8095	0.4659	4681	1858.98	2.5172	0.0001	Only significant in TCs in accessible promoters
PAX2_4	234	138.978	1.6788	0.0435	16826	8940.69	1.8819	0.0001	Only significant in TCs in accessible promoters
PAX3_1	83	81.8364	1.014	0.4905	12535	5303.53	2.3633	0.0001	Only significant in TCs in accessible promoters
PAX3_2	39	33.2014	1.1695	0.4194	4528	2142.67	2.1127	0.0001	Only significant in TCs in accessible promoters
PAX3_3	10	6.111	1.5469	0.4185	78	396.579	0.1987	0.0001	None significant
PAX4_2	0	24.2934	0.0395	0.087	490	1594.57	0.3077	0.0001	None significant
PAX4_3	495	384.652	1.2861	0.0541	38442	24514.3	1.5681	0.0001	Only significant in TCs in accessible promoters
PAX4_4	423	343.748	1.2299	0.2149	25931	22114.4	1.1726	0.0001	Only significant in TCs in accessible promoters
PAX4_5	298	368.499	0.8092	0.2729	30111	24110.3	1.2489	0.0001	Only significant in TCs in accessible promoters
PAX4_6	34	22.5558	1.4858	0.3099	292	1437.23	0.2037	0.0001	None significant
PAX4_7	8	8.4122	0.9562	0.7196	126	548.696	0.231	0.0001	None significant
PAX4_8	0	3.0223	0.2486	0.6607	56	187.964	0.3016	0.0001	None significant
PAX5_known1	1499	1314.31	1.1404	0.1528	149701	84738.2	1.7666	0.0001	Only significant in TCs in accessible promoters
PAX5_known2	261	303.565	0.8602	0.3533	37685	19199.6	1.9627	0.0001	Only significant in TCs in accessible promoters
PAX5_known3	126	110.984	1.1341	0.3234	6562	7094.67	0.9249	0.0225	None significant
PAX5_known4	625	705.727	0.8858	0.2552	93174	44897.4	2.0752	0.0001	Only significant in TCs in accessible promoters
PAX5_known5	256	156.295	1.6339	0.024	19405	9808.69	1.9782	0.0001	Only significant in TCs in accessible promoters
PAX6_1	168	70.6612	2.3583	0.0195	3674	4504.71	0.8156	0.0045	None significant
PAX6_2	319	218.377	1.4587	0.0359	15755	13811.7	1.1407	0.0001	Only significant in TCs in accessible promoters
PAX6_3	126	40.8672	3.0334	0.0045	1960	2658.48	0.7374	0.0001	None significant
PAX6_5	243	89.8997	2.6843	0.0001	5584	5602.98	0.9966	0.4742	Only significant in TCs in accessible enhancers
PAX7_1	50	24.4132	2.0068	0.1475	459	1549.59	0.2967	0.0001	None significant
PAX7_2	10	6.9716	1.3799	0.4824	48	443.19	0.1103	0.0001	None significant
PAX7_3	10	5.9281	1.5877	0.4234	78	358.339	0.2198	0.0001	None significant
PAX8_1	175	122.892	1.4206	0.1396	8594	7838.44	1.0964	0.015	None significant
PAX8_2	206	110.382	1.8585	0.0179	11085	7005.24	1.5823	0.0001	Only significant in TCs in accessible promoters
PAX9_1	252	104.553	2.3969	0.0001	10320	6653.27	1.551	0.0001	Both significant
PBX1_1	27	17.7212	1.4956	0.2956	308	1068.6	0.2889	0.0001	None significant
PBX1_2	45	35.4839	1.2608	0.3457	775	2220.4	0.3493	0.0001	None significant
PBX1_3	60	37.3325	1.5913	0.1622	1176	2265.11	0.5194	0.0001	None significant
PBX1_4	63	27.0098	2.2849	0.0344	601	1722.57	0.3493	0.0001	None significant
PBX1_5	45	50.0489	0.9011	0.467	1066	3210.68	0.3322	0.0001	None significant
PBX3_known1	38	57.9414	0.6617	0.2312	3344	3845.56	0.8696	0.006	None significant
PDX1_1	12	28.2729	0.4441	0.2677	393	1768.44	0.2227	0.0001	None significant
PDX1_2	120	51.3507	2.3113	0.015	1511	3348.66	0.4514	0.0001	None significant
PDX1_4	64	37.9394	1.6693	0.1668	635	2315.35	0.2746	0.0001	None significant
PDX1_5	0	31.2739	0.031	0.1547	372	1989.65	0.1874	0.0001	None significant
PDX1_6	24	13.825	1.6863	0.2277	362	901.246	0.4023	0.0001	None significant
PHOX2A_1	18	22.9671	0.7928	0.5526	352	1395.35	0.2528	0.0001	None significant
PHOX2A_2	22	17.4132	1.2491	0.4221	189	1154.28	0.1645	0.0001	None significant
PHOX2B_1	33	23.6006	1.3821	0.3553	275	1468.08	0.1879	0.0001	None significant
PHOX2B_2	22	17.7958	1.2237	0.4419	189	1088.06	0.1745	0.0001	None significant
PHOX2B_3	22	17.244	1.2607	0.4033	178	1071.11	0.167	0.0001	None significant
PITX1_1	34	58.8607	0.5847	0.2449	2224	3741.87	0.5945	0.0001	None significant
PITX1_2	0	27.1523	0.0355	0.0315	1115	1662.04	0.6711	0.0001	None significant
PITX1_3	9	25.1433	0.3825	0.2192	840	1549.37	0.5425	0.0001	None significant
PITX1_4	8	16.563	0.5124	0.3666	583	1034.06	0.5642	0.0001	None significant
PITX2_1	22	39.0087	0.5749	0.2651	1284	2494.38	0.515	0.0001	None significant
PITX2_2	17	46.438	0.3794	0.1851	1673	2928.59	0.5714	0.0001	None significant
PITX3_1	80	82.0941	0.9748	0.5406	7051	5384.61	1.3094	0.0001	Only significant in TCs in accessible promoters
PITX3_2	0	26.9655	0.0358	0.0465	1208	1681.3	0.7187	0.0001	None significant
PKNOX1_1	139	112.401	1.2346	0.2487	5543	7234.84	0.7662	0.0001	None significant
PKNOX1_2	123	72.7712	1.6809	0.0461	2067	4657.04	0.444	0.0001	None significant
PKNOX2_1	247	147.773	1.667	0.0259	9137	9492.48	0.9626	0.1773	None significant
PKNOX2_2	135	86.6623	1.5514	0.072	2624	5575.02	0.4708	0.0001	None significant
PKNOX2_3	120	75.7172	1.5772	0.0825	2108	4779.11	0.4412	0.0001	None significant
POU1F1_1	10	26.8637	0.3948	0.206	277	1691.54	0.1642	0.0001	None significant
POU1F1_2	36	59.0185	0.6165	0.2932	682	3730.32	0.183	0.0001	None significant
POU1F1_3	17	27.456	0.6326	0.3834	212	1703.31	0.125	0.0001	None significant
POU1F1_4	13	44.6016	0.307	0.0825	538	2893.02	0.1862	0.0001	None significant
POU1F1_5	28	40.5124	0.6986	0.3977	773	2604.26	0.2971	0.0001	None significant
POU2F2_1	48	49.4858	0.9706	0.5788	925	3047.52	0.3038	0.0001	None significant
POU2F2_2	18	31.9428	0.5768	0.2171	624	1975.13	0.3163	0.0001	None significant
POU2F2_3	14	32.7346	0.4446	0.281	436	2043.38	0.2138	0.0001	None significant
POU2F2_4	28	28.387	0.9868	0.6373	353	1705.27	0.2075	0.0001	None significant
POU2F2_5	18	24.1044	0.7568	0.4814	481	1473.99	0.3268	0.0001	None significant
POU2F2_known1	19	54.2806	0.3618	0.1688	1010	3326.66	0.3038	0.0001	None significant
POU2F2_known10	20	40.8732	0.5015	0.1866	860	2483.52	0.3465	0.0001	None significant
POU2F2_known11	22	38.9988	0.575	0.2558	714	2558.44	0.2794	0.0001	None significant
POU2F2_known12	33	45.8982	0.725	0.3475	801	2840.19	0.2823	0.0001	None significant
POU2F2_known13	44	52.1771	0.8462	0.4949	927	3367.36	0.2755	0.0001	None significant
POU2F2_known14	0	27.6781	0.0349	0.1485	211	1841.52	0.1151	0.0001	None significant
POU2F2_known15	20	34.5116	0.5914	0.2258	597	2071.5	0.2885	0.0001	None significant
POU2F2_known16	0	29.9933	0.0323	0.0825	322	1917.14	0.1684	0.0001	None significant
POU2F2_known2	15	32.6131	0.476	0.2975	743	2148.65	0.3461	0.0001	None significant
POU2F2_known3	65	29.0387	2.1972	0.0615	1043	1724.36	0.6051	0.0001	None significant
POU2F2_known4	25	65.8803	0.3888	0.1668	785	4220.14	0.1862	0.0001	None significant
POU2F2_known5	42	45.939	0.9161	0.5295	918	2915.16	0.3151	0.0001	None significant
POU2F2_known6	28	43.2582	0.6552	0.3536	503	2673.24	0.1885	0.0001	None significant
POU2F2_known7	94	69.6806	1.3441	0.2183	1796	4336.39	0.4143	0.0001	None significant
POU2F2_known8	39	48.258	0.8121	0.4432	997	2933.64	0.3401	0.0001	None significant
POU2F2_known9	12	26.2022	0.4779	0.3346	305	1717.77	0.178	0.0001	None significant
POU2F3_1	56	46.9534	1.1887	0.3483	918	3027.21	0.3035	0.0001	None significant
POU2F3_2	27	28.1319	0.9611	0.5675	530	1683.77	0.3152	0.0001	None significant
POU2F3_3	12	27.1154	0.4624	0.2704	256	1674.73	0.1534	0.0001	None significant
POU3F1_1	20	26.3507	0.7678	0.4966	196	1637.1	0.1203	0.0001	None significant
POU3F1_2	12	32.5725	0.3872	0.204	570	2137.27	0.267	0.0001	None significant
POU3F1_3	36	33.2284	1.081	0.4699	330	2120.7	0.156	0.0001	None significant
POU3F2_1	64	38.5778	1.6423	0.1742	724	2501.72	0.2897	0.0001	None significant
POU3F2_2	74	36.3448	2.0083	0.0634	353	2315.13	0.1528	0.0001	None significant
POU3F2_3	20	17.8226	1.1157	0.4834	209	1127.82	0.186	0.0001	None significant
POU3F2_4	18	25.1488	0.7266	0.5086	267	1652.61	0.1621	0.0001	None significant
POU3F2_5	39	32.5486	1.1923	0.4065	381	2015.28	0.1895	0.0001	None significant
POU3F2_6	12	32.7675	0.385	0.1786	679	2152.32	0.3158	0.0001	None significant
POU3F3_1	17	38.5797	0.4548	0.2673	447	2349.2	0.1906	0.0001	None significant
POU3F3_2	34	33.3961	1.0176	0.4805	396	2115.1	0.1876	0.0001	None significant
POU3F3_3	36	32.1715	1.1154	0.463	294	1998.54	0.1475	0.0001	None significant
POU3F3_4	10	26.0864	0.4061	0.1422	238	1634.99	0.1461	0.0001	None significant
POU3F4_1	37	26.9992	1.3572	0.2464	247	1652.06	0.15	0.0001	None significant
POU3F4_2	18	24.0172	0.7595	0.4613	470	1497.17	0.3144	0.0001	None significant
POU3F4_3	22	26.9539	0.8228	0.4885	242	1746.05	0.1391	0.0001	None significant
POU4F1_1	63	37.0642	1.6814	0.1239	390	2367.88	0.1651	0.0001	None significant
POU4F2_1	64	46.2491	1.3757	0.2674	455	2866.62	0.159	0.0001	None significant
POU4F2_2	64	43.8352	1.4498	0.2239	434	2900.38	0.1499	0.0001	None significant
POU4F3_1	48	34.1	1.396	0.2951	265	2116.06	0.1256	0.0001	None significant
POU4F3_2	51	42.7756	1.1879	0.3085	471	2794.36	0.1689	0.0001	None significant
POU5F1_known1	56	59.5684	0.9411	0.4707	703	3767.5	0.1868	0.0001	None significant
POU5F1_known2	0	54.6185	0.018	0.0165	773	3608.84	0.2144	0.0001	None significant
POU5F1_known3	25	65.5967	0.3904	0.0629	894	4060.7	0.2204	0.0001	None significant
POU5F1_known4	27	26.2178	1.0287	0.5311	526	1684.08	0.3127	0.0001	None significant
POU5F1_known5	12	24.7505	0.5048	0.3488	238	1548.21	0.1543	0.0001	None significant
POU6F1_1	11	22.0545	0.5205	0.3485	214	1342.12	0.1601	0.0001	None significant
POU6F1_2	65	51.7056	1.2522	0.3194	795	3318.62	0.2398	0.0001	None significant
POU6F1_3	48	52.5536	0.915	0.4655	698	3432.91	0.2036	0.0001	None significant
POU6F2_1	20	29.4448	0.6898	0.4027	397	1844.64	0.2156	0.0001	None significant
POU6F2_2	0	24.2082	0.0397	0.174	162	1490.92	0.1093	0.0001	None significant
POU6F2_3	30	26.3495	1.1335	0.4469	455	1654.72	0.2754	0.0001	None significant
PPARA_1	103	148.11	0.6975	0.198	7470	9590.8	0.7789	0.0001	None significant
PPARA_2	196	402.502	0.4882	0.006	36883	25414	1.4513	0.0001	Only significant in TCs in accessible promoters
PPARA_3	234	168.484	1.3866	0.1345	10048	10606.8	0.9473	0.0925	None significant
PPARA_4	381	222.027	1.7128	0.0045	12815	14098.1	0.909	0.0015	None significant
PRDM1_known2	114	139.544	0.8182	0.3194	8261	8900.54	0.9282	0.0313	None significant
PRDM4_1	117	122.503	0.9554	0.4677	8146	7910.13	1.0298	0.198	None significant
PROP1_1	18	22.7247	0.8009	0.5688	290	1424.6	0.2041	0.0001	None significant
PROP1_2	11	14.8398	0.7576	0.5694	86	918.777	0.0946	0.0001	None significant
PROP1_3	11	16.1183	0.701	0.563	196	983.125	0.2002	0.0001	None significant
PROX1_1	24	28.4755	0.8482	0.5315	2983	1875.83	1.5899	0.0001	Only significant in TCs in accessible promoters
PRRX1_1	17	26.6736	0.6504	0.4124	460	1643.09	0.2804	0.0001	None significant
PRRX1_2	24	14.014	1.6651	0.236	350	915.817	0.3828	0.0001	None significant
PRRX1_3	24	14.04	1.6622	0.2343	429	902.939	0.4757	0.0001	None significant
PRRX1_4	11	17.0264	0.6657	0.5053	163	1024.64	0.1599	0.0001	None significant
PRRX2_1	32	28.4989	1.1187	0.5071	456	1814.23	0.2518	0.0001	None significant
PRRX2_3	0	25.6308	0.0376	0.1757	375	1585.31	0.237	0.0001	None significant
PRRX2_4	24	14.0982	1.6558	0.2421	429	902.88	0.4757	0.0001	None significant
PRRX2_5	16	12.0595	1.3017	0.4372	262	748.592	0.3509	0.0001	None significant
PTEN_1	172	159.106	1.0805	0.3781	10986	10098.9	1.0878	0.0044	Only significant in TCs in accessible promoters
PTF1A_1	216	188.656	1.1442	0.2603	17250	11966.2	1.4415	0.0001	Only significant in TCs in accessible promoters
RARA_1	115	132.747	0.8673	0.3853	7080	8485.46	0.8344	0.0001	None significant
RARA_10	120	94.1554	1.2716	0.2583	3415	6036.49	0.5658	0.0001	None significant
RARA_2	100	157.905	0.6356	0.1296	8811	10119	0.8707	0.0001	None significant
RARA_3	99	99.6409	0.9936	0.5345	3567	6263.87	0.5695	0.0001	None significant
RARA_4	91	177.569	0.5152	0.0489	11281	11480.7	0.9826	0.3115	None significant
RARA_5	75	80.2462	0.9354	0.4936	3218	5198.01	0.6192	0.0001	None significant
RARA_6	244	230.421	1.0587	0.4014	15685	14812.1	1.0589	0.0404	None significant
RARA_7	108	168.822	0.6419	0.1393	8949	10712.2	0.8354	0.0001	None significant
RARA_8	244	197.568	1.2338	0.2081	10567	12523.1	0.8438	0.0001	None significant
RARA_9	91	115.44	0.7901	0.3141	5048	7245.82	0.6967	0.0001	None significant
RARB_1	80	91.9075	0.8718	0.4181	3256	6006.14	0.5422	0.0001	None significant
RARB_2	228	183.145	1.2436	0.1994	9229	11785.2	0.7831	0.0001	None significant
RARB_3	91	124.038	0.7358	0.2518	5984	7952.23	0.7525	0.0001	None significant
RARB_4	32	78.5913	0.4146	0.0956	2487	4945.99	0.5029	0.0001	None significant
RARG_1	154	114.388	1.3433	0.1682	5384	7121.89	0.756	0.0001	None significant
RARG_2	151	164.571	0.918	0.4233	9426	10347.5	0.911	0.0165	None significant
RARG_3	189	186.554	1.013	0.473	10922	11948.3	0.9141	0.012	None significant
RARG_4	168	110.939	1.5097	0.1035	5066	7114.5	0.7121	0.0001	None significant
RARG_5	144	160.837	0.896	0.4287	8674	9992.52	0.8681	0.0001	None significant
RARG_6	249	193.169	1.2875	0.1744	14181	12420.7	1.1417	0.0001	Only significant in TCs in accessible promoters
RARG_7	96	89.8199	1.068	0.4252	3298	5731.18	0.5755	0.0001	None significant
RARG_8	97	122.451	0.7938	0.3072	5198	7823.78	0.6644	0.0001	None significant
RARG_9	247	160.294	1.5376	0.0557	8373	10245.8	0.8172	0.0001	None significant
RAR_1	172	142.218	1.208	0.198	8348	9079.51	0.9194	0.006	None significant
RAX_1	35	29.4555	1.1821	0.3473	1105	1862.29	0.5936	0.0001	None significant
RAX_2	30	18.8781	1.5595	0.2535	483	1250.18	0.3868	0.0001	None significant
RBPJ_1	81	68.7406	1.1758	0.2884	3244	4517.27	0.7182	0.0001	None significant
RBPJ_2	94	81.6172	1.1499	0.3288	5031	5231.85	0.9616	0.2137	None significant
REL_1	113	95.2943	1.1839	0.263	8793	6091.8	1.4433	0.0001	Only significant in TCs in accessible promoters
REL_2	113	93.9542	1.2006	0.2544	9188	6095.08	1.5074	0.0001	Only significant in TCs in accessible promoters
REST_known3	928	764.514	1.2136	0.0825	82801	48733.3	1.699	0.0001	Only significant in TCs in accessible promoters
REST_known4	716	630.299	1.1358	0.2367	57890	40018	1.4466	0.0001	Only significant in TCs in accessible promoters
RFX2_1	307	64.7098	4.6873	0.0001	6007	4078.29	1.4728	0.0001	Both significant
RFX2_2	275	106.24	2.5737	0.0001	7630	6594.21	1.1571	0.0001	Both significant
RFX2_3	323	70.1419	4.5543	0.0001	6892	4467.14	1.5427	0.0001	Both significant
RFX2_4	346	110.546	3.1108	0.0001	9401	6942.07	1.3542	0.0001	Both significant
RFX3_1	526	164.112	3.1918	0.0001	14468	10664.4	1.3566	0.0001	Both significant
RFX3_2	323	79.5588	4.0219	0.0001	7384	4971.76	1.4851	0.0001	Both significant
RFX3_3	275	88.4467	3.0856	0.0001	6348	5687.6	1.1161	0.0119	Only significant in TCs in accessible enhancers
RFX3_4	291	69.8295	4.1226	0.0001	6273	4372.36	1.4346	0.0001	Both significant
RFX5_known1	245	118.325	2.0616	0.0014	9834	7505.69	1.3102	0.0001	Only significant in TCs in accessible promoters
RFX5_known2	450	133.47	3.3539	0.0001	14385	8479.62	1.6963	0.0001	Both significant
RFX5_known3	94	60.1955	1.5524	0.1215	4637	3804.56	1.2187	0.0001	Only significant in TCs in accessible promoters
RFX5_known4	107	50.4747	2.0981	0.012	5363	3378.13	1.5874	0.0001	Only significant in TCs in accessible promoters
RFX5_known5	393	122.525	3.1896	0.0001	12023	7788.31	1.5437	0.0001	Both significant
RFX5_known6	307	80.2875	3.789	0.0001	7938	5133.65	1.5462	0.0001	Both significant
RFX5_known7	286	103.394	2.7492	0.0001	9975	6738.09	1.4803	0.0001	Both significant
RFX5_known8	339	75.4345	4.4483	0.0001	6716	4838.52	1.3879	0.0001	Both significant
RFX5_known9	339	85.859	3.9144	0.0001	7368	5435.71	1.3554	0.0001	Both significant
RFX7_1	390	117.439	3.3013	0.0001	13633	7471.74	1.8245	0.0001	Both significant
RHOXF1_1	63	53.7762	1.1684	0.3706	2711	3405.68	0.7961	0.0015	None significant
RHOXF1_2	63	54.1997	1.1594	0.385	2841	3562.33	0.7976	0.0015	None significant
RHOXF1_3	63	27.6463	2.2341	0.0254	1573	1762.58	0.8925	0.057	None significant
RHOXF1_4	73	53.5468	1.3566	0.1648	3377	3379.06	0.9994	0.5048	None significant
RHOXF1_5	63	27.8031	2.222	0.0345	1776	1768.86	1.004	0.4913	None significant
RHOXF1_6	65	55.5999	1.1661	0.3031	3424	3524.41	0.9715	0.258	None significant
RHOXF1_7	45	30.2622	1.4714	0.2182	1530	1957.1	0.7819	0.0001	None significant
RHOXF2_1	18	28.0898	0.6531	0.4521	552	1793.99	0.3081	0.0001	None significant
RORA_1	62	62.4381	0.9931	0.5158	1620	3948.89	0.4104	0.0001	None significant
RORA_2	25	45.917	0.5542	0.1635	1226	2930.54	0.4186	0.0001	None significant
RORA_3	44	50.2472	0.8781	0.46	1364	3186.31	0.4283	0.0001	None significant
RORA_4	56	53.3515	1.0487	0.4237	1448	3382.62	0.4282	0.0001	None significant
RORA_5	14	52.0489	0.2828	0.0855	1388	3338.56	0.4159	0.0001	None significant
RORA_6	100	195.061	0.5151	0.0682	10515	12344.3	0.8518	0.0001	None significant
RORA_7	95	82.7788	1.1459	0.3711	3067	5303.34	0.5784	0.0001	None significant
RUNX1_1	18	16.3982	1.0921	0.5298	316	1055.68	0.3	0.0001	None significant
RUNX1_2	32	47.4863	0.6806	0.3444	891	3013.82	0.2959	0.0001	None significant
RUNX1_3	74	31.062	2.3392	0.0251	727	1982.28	0.3671	0.0001	None significant
RUNX1_4	22	24.4591	0.9034	0.5856	371	1535.7	0.2421	0.0001	None significant
RUNX1_5	30	49.6107	0.6125	0.3006	811	3153.4	0.2574	0.0001	None significant
RUNX1_6	44	24.0654	1.7953	0.154	357	1482.89	0.2413	0.0001	None significant
RUNX1_8	86	40.0974	2.1169	0.0555	876	2471.11	0.3548	0.0001	None significant
RUNX1_9	213	155.773	1.365	0.085	7780	9965.16	0.7807	0.0001	None significant
RUNX2_2	114	41.5724	2.7013	0.0014	1080	2627.23	0.4113	0.0001	None significant
RUNX2_3	65	41.3918	1.5569	0.0839	1829	2573.22	0.7109	0.0001	None significant
RUNX2_4	248	182.533	1.3567	0.1091	25409	11585.3	2.1931	0.0001	Only significant in TCs in accessible promoters
RUNX2_5	264	238.709	1.1055	0.3402	39290	15552.5	2.5262	0.0001	Only significant in TCs in accessible promoters
RUNX2_6	63	29.4191	2.1039	0.042	2218	1855.79	1.1951	0.0001	Only significant in TCs in accessible promoters
RUNX3_1	248	213.262	1.1621	0.2801	28458	13497.8	2.1083	0.0001	Only significant in TCs in accessible promoters
RUNX3_2	80	37.6151	2.0976	0.0285	2779	2448.23	1.1351	0.0134	None significant
RUNX3_3	356	342.49	1.0393	0.4172	56272	22160.5	2.5392	0.0001	Only significant in TCs in accessible promoters
RUNX3_4	100	41.4181	2.3811	0.0059	2800	2697.16	1.0381	0.2371	None significant
RUNX_1	260	163.075	1.5907	0.0179	10888	10333.5	1.0537	0.0794	None significant
RUNX_2	240	136.687	1.7503	0.0119	8963	8726.38	1.0271	0.2359	None significant
RXRA_known1	113	163.566	0.6927	0.2135	10103	10633.2	0.9501	0.129	None significant
RXRA_known10	101	115.554	0.8751	0.3853	7000	7379.55	0.9486	0.1104	None significant
RXRA_known11	150	109.945	1.361	0.1434	10587	6969.48	1.519	0.0001	Only significant in TCs in accessible promoters
RXRA_known12	115	112.651	1.0207	0.4688	6447	7048.59	0.9147	0.027	None significant
RXRA_known14	73	125.71	0.584	0.1035	7876	8057.79	0.9774	0.3069	None significant
RXRA_known15	84	68.8784	1.2164	0.3071	6487	4473.78	1.4499	0.0001	Only significant in TCs in accessible promoters
RXRA_known2	176	105.583	1.6607	0.0975	4605	6733.02	0.684	0.0001	None significant
RXRA_known3	45	38.9477	1.1515	0.3474	1446	2485.69	0.5819	0.0001	None significant
RXRA_known4	57	41.3966	1.368	0.168	1530	2642.04	0.5793	0.0001	None significant
RXRA_known5	248	186.519	1.3279	0.163	10486	11990.5	0.8745	0.0001	None significant
RXRA_known6	134	104.491	1.2797	0.2344	4961	6682.83	0.7424	0.0001	None significant
RXRA_known7	620	497.726	1.2452	0.0716	38547	32006.3	1.2044	0.0001	Only significant in TCs in accessible promoters
RXRA_known8	227	258.85	0.8774	0.3151	20595	16833.5	1.2234	0.0001	Only significant in TCs in accessible promoters
RXRA_known9	263	193.582	1.3568	0.1203	16200	12474.5	1.2986	0.0001	Only significant in TCs in accessible promoters
RXRB_1	101	112.758	0.8966	0.4174	6518	7081.33	0.9205	0.0301	None significant
RXRB_2	59	117.151	0.5078	0.0721	7433	7472.88	0.9947	0.4398	None significant
RXRG_1	59	103.382	0.5748	0.1275	6096	6515.09	0.9357	0.08	None significant
RXRG_2	136	77.7067	1.7406	0.042	6712	4846.49	1.3848	0.0001	Only significant in TCs in accessible promoters
RXRG_3	143	110.062	1.2966	0.175	6046	6927.18	0.8728	0.0015	None significant
SCRT1_1	131	111.998	1.1682	0.3003	5678	7152.93	0.7938	0.0001	None significant
SCRT2_1	130	91.2102	1.4207	0.1335	5081	5885.2	0.8634	0.0015	None significant
SEF1_1	278	217.974	1.2741	0.1768	20197	13790.1	1.4646	0.0001	Only significant in TCs in accessible promoters
SHOX2_1	18	23.3297	0.7809	0.5682	398	1445.67	0.2758	0.0001	None significant
SHOX2_2	16	10.6049	1.4649	0.3675	296	700.307	0.4235	0.0001	None significant
SHOX2_3	16	11.2163	1.3916	0.3883	296	703.287	0.4217	0.0001	None significant
SHOX_1	16	10.6329	1.4614	0.3572	296	695.632	0.4263	0.0001	None significant
SIX5_known1	41	36.5018	1.1199	0.3964	1096	2347.16	0.4672	0.0001	None significant
SIX5_known2	41	40.2137	1.0191	0.4342	1532	2563.32	0.5978	0.0001	None significant
SIX5_known3	34	40.4033	0.8453	0.5033	1458	2606.2	0.5596	0.0001	None significant
SIX5_known4	41	34.7294	1.1755	0.345	1136	2324.72	0.4889	0.0001	None significant
SIX5_known5	147	92.4975	1.5829	0.086	4993	5988.63	0.8338	0.0001	None significant
SIX5_known6	41	32.8636	1.2403	0.3236	945	2058.46	0.4593	0.0001	None significant
SIX5_known7	41	31.4278	1.2952	0.2894	759	2097.17	0.3622	0.0001	None significant
SMAD3_1	119	103.454	1.1488	0.2859	6075	6629.93	0.9163	0.009	None significant
SMAD3_2	205	175.034	1.1702	0.2853	12313	11103.6	1.1089	0.0014	Only significant in TCs in accessible promoters
SMAD3_3	0	20.2132	0.0471	0.1143	1307	1263.61	1.0343	0.3365	None significant
SMAD4_1	294	310.829	0.946	0.4203	28956	19844.2	1.4591	0.0001	Only significant in TCs in accessible promoters
SMAD_1	83	83.8216	0.9903	0.5326	6772	5460.61	1.2401	0.0001	Only significant in TCs in accessible promoters
SMAD_2	173	147.133	1.1746	0.2552	6611	9320.17	0.7094	0.0001	None significant
SNAI2_1	187	145.538	1.2829	0.1298	7276	9255.91	0.7861	0.0001	None significant
SOX10_1	14	29.7002	0.4886	0.1865	1231	1840.81	0.6689	0.0001	None significant
SOX10_10	72	50.4659	1.4184	0.2061	592	3192.83	0.1857	0.0001	None significant
SOX10_3	135	54.9594	2.4303	0.015	865	3442.37	0.2515	0.0001	None significant
SOX10_5	75	43.2931	1.7158	0.1263	652	2767.71	0.2359	0.0001	None significant
SOX10_7	95	63.663	1.4846	0.1467	1142	4226.7	0.2704	0.0001	None significant
SOX10_8	108	53.3624	2.0051	0.0344	783	3381.4	0.2318	0.0001	None significant
SOX11_1	54	116.661	0.4674	0.069	3731	7248.42	0.5148	0.0001	None significant
SOX11_2	123	54.3152	2.2417	0.018	689	3215.57	0.2145	0.0001	None significant
SOX12_1	28	39.0964	0.7233	0.4183	512	2475.75	0.2071	0.0001	None significant
SOX13_1	48	36.4117	1.3098	0.3367	479	2273.93	0.211	0.0001	None significant
SOX14_1	32	19.2562	1.6291	0.296	192	1203.68	0.1602	0.0001	None significant
SOX14_2	60	33.1548	1.786	0.1257	559	2053.76	0.2725	0.0001	None significant
SOX14_3	44	44.8303	0.9819	0.4788	620	2810.56	0.2209	0.0001	None significant
SOX14_4	69	39.4811	1.7292	0.1014	702	2553.6	0.2752	0.0001	None significant
SOX15_1	34	38.9944	0.8751	0.5419	668	2466.02	0.2712	0.0001	None significant
SOX15_2	15	39.5407	0.3947	0.2067	427	2432.36	0.1759	0.0001	None significant
SOX15_3	54	29.3014	1.8151	0.1321	339	1895.25	0.1793	0.0001	None significant
SOX15_4	9	36.9248	0.2637	0.0937	267	2450.27	0.1093	0.0001	None significant
SOX17_2	25	36.8575	0.6868	0.2489	1052	2318.55	0.454	0.0001	None significant
SOX17_3	0	31.5574	0.0307	0.094	377	1965.89	0.1922	0.0001	None significant
SOX17_4	75	34.8343	2.1209	0.0675	405	2201.21	0.1844	0.0001	None significant
SOX17_5	45	40.5544	1.107	0.454	320	2428.44	0.1321	0.0001	None significant
SOX18_1	33	39.5953	0.8375	0.4856	486	2582.87	0.1885	0.0001	None significant
SOX18_2	45	36.2353	1.2354	0.3974	500	2260.76	0.2215	0.0001	None significant
SOX18_3	60	32.7192	1.8091	0.1506	321	2016.32	0.1596	0.0001	None significant
SOX18_4	45	38.7528	1.1572	0.4329	230	2307.07	0.1001	0.0001	None significant
SOX1_1	46	31.512	1.4456	0.2767	270	2004.73	0.1351	0.0001	None significant
SOX1_2	60	40.9013	1.4558	0.2464	649	2536.82	0.2561	0.0001	None significant
SOX1_3	29	43.2731	0.6776	0.2647	553	2737.56	0.2023	0.0001	None significant
SOX1_4	39	31.9376	1.2144	0.3963	443	2001.92	0.2217	0.0001	None significant
SOX1_5	39	27.2783	1.4145	0.3	324	1760.94	0.1845	0.0001	None significant
SOX21_1	48	20.2554	2.3053	0.1035	204	1292.13	0.1585	0.0001	None significant
SOX21_2	60	46.8356	1.2752	0.3078	756	2937.89	0.2576	0.0001	None significant
SOX21_3	66	44.7241	1.4653	0.1935	698	2877.9	0.2428	0.0001	None significant
SOX21_4	52	31.494	1.6311	0.1954	486	1967.39	0.2474	0.0001	None significant
SOX21_5	39	34.0441	1.1414	0.4331	530	2284.64	0.2323	0.0001	None significant
SOX2_1	60	76.966	0.7824	0.378	1903	4861.41	0.3916	0.0001	None significant
SOX2_2	52	39.7318	1.3012	0.2538	600	2508.65	0.2395	0.0001	None significant
SOX2_3	29	39.2391	0.7455	0.2768	489	2554.33	0.1918	0.0001	None significant
SOX2_4	34	36.856	0.9246	0.5873	560	2319.28	0.2418	0.0001	None significant
SOX2_5	69	44.7042	1.5316	0.1506	624	2927.03	0.2135	0.0001	None significant
SOX2_6	44	34.9314	1.2524	0.3194	478	2189.48	0.2187	0.0001	None significant
SOX2_7	44	43.3206	1.0153	0.5156	763	2842.18	0.2687	0.0001	None significant
SOX30_1	32	44.7599	0.7212	0.423	1445	2902.19	0.4981	0.0001	None significant
SOX3_1	35	33.0372	1.0577	0.3669	259	2138.66	0.1215	0.0001	None significant
SOX3_2	61	39.0779	1.547	0.1972	520	2470.98	0.2108	0.0001	None significant
SOX3_3	34	45.6139	0.7508	0.4645	493	2959.81	0.1668	0.0001	None significant
SOX4_1	103	121.588	0.8484	0.3665	4331	7676.04	0.5643	0.0001	None significant
SOX4_2	113	60.861	1.8428	0.0375	977	3818.65	0.256	0.0001	None significant
SOX5_1	10	21.0777	0.4982	0.3312	355	1276.05	0.2788	0.0001	None significant
SOX5_3	32	36.2645	0.8856	0.5517	529	2346.53	0.2258	0.0001	None significant
SOX7_1	0	56.8774	0.0173	0.0469	1003	3581.24	0.2803	0.0001	None significant
SOX7_2	66	38.4534	1.6982	0.1182	297	2363.7	0.126	0.0001	None significant
SOX7_3	86	47.4107	1.7971	0.0758	539	3052.66	0.1768	0.0001	None significant
SOX7_4	68	48.0056	1.408	0.2508	370	3049.56	0.1216	0.0001	None significant
SOX8_1	34	37.0137	0.9207	0.5542	579	2304.26	0.2516	0.0001	None significant
SOX8_3	38	47.6259	0.802	0.3295	1129	3198.04	0.3532	0.0001	None significant
SOX8_4	154	62.959	2.4234	0.0014	1022	4116.39	0.2485	0.0001	None significant
SOX8_5	85	47.5364	1.7719	0.1125	569	3132.41	0.1819	0.0001	None significant
SOX8_6	95	67.2149	1.4073	0.166	1457	4387.74	0.3322	0.0001	None significant
SOX8_7	90	58.2013	1.5371	0.1708	913	3693.49	0.2474	0.0001	None significant
SOX8_8	38	46.6952	0.8177	0.3383	1011	2928.4	0.3455	0.0001	None significant
SOX8_9	68	49.9345	1.3547	0.2868	667	3169.45	0.2107	0.0001	None significant
SOX9_1	28	48.9775	0.5803	0.2818	1693	3149.66	0.5377	0.0001	None significant
SOX9_2	9	26.766	0.3602	0.1916	1034	1668.13	0.6201	0.0001	None significant
SOX9_3	9	28.3743	0.3404	0.165	903	1756.9	0.5143	0.0001	None significant
SOX9_6	76	55.3079	1.3675	0.2588	664	3594.46	0.185	0.0001	None significant
SOX9_7	154	60.9182	2.5033	0.0014	798	3830.42	0.2085	0.0001	None significant
SOX9_8	68	49.7362	1.36	0.2733	690	3176.41	0.2175	0.0001	None significant
SOX9_9	68	57.0888	1.1878	0.3672	679	3624.29	0.1876	0.0001	None significant
SOX_1	52	53.2207	0.9775	0.5563	1819	3476.14	0.5234	0.0001	None significant
SP100_1	0	11.5919	0.0794	0.4097	1087	697.908	1.5567	0.0001	Only significant in TCs in accessible promoters
SP1_known3	397	484.56	0.8197	0.1337	53734	30897.2	1.7391	0.0001	Only significant in TCs in accessible promoters
SPDEF_1	96	99.1314	0.9687	0.5316	22544	6234.67	3.6155	0.0001	Only significant in TCs in accessible promoters
SPDEF_2	11	40.5586	0.2887	0.1044	10403	2568.19	4.0495	0.0001	Only significant in TCs in accessible promoters
SPDEF_3	49	58.5336	0.8399	0.407	7500	3753.17	1.998	0.0001	Only significant in TCs in accessible promoters
SPDEF_4	0	80.3718	0.0123	0.006	3152	4961.54	0.6354	0.0001	None significant
SPDEF_5	22	51.171	0.4409	0.1283	12298	3339.8	3.6815	0.0001	Only significant in TCs in accessible promoters
SPDEF_6	71	105.158	0.6782	0.2004	13544	6709.83	2.0184	0.0001	Only significant in TCs in accessible promoters
SPDEF_7	96	76.9311	1.2447	0.2875	3967	4803.97	0.8258	0.0001	None significant
SPI1_known1	97	130.752	0.7438	0.1455	11129	8470.49	1.3138	0.0001	Only significant in TCs in accessible promoters
SPI1_known2	55	43.3516	1.2626	0.2531	3153	2792.37	1.1291	0.0044	Only significant in TCs in accessible promoters
SPI1_known3	99	154.08	0.6448	0.1041	21141	9856.15	2.1448	0.0001	Only significant in TCs in accessible promoters
SPI1_known4	63	102.289	0.6196	0.174	8728	6389.73	1.3659	0.0001	Only significant in TCs in accessible promoters
SPIB_1	28	63.1009	0.4524	0.0438	3659	3940.83	0.9285	0.0465	None significant
SPIB_2	63	114.29	0.5551	0.0875	11751	7315.41	1.6063	0.0001	Only significant in TCs in accessible promoters
SPIC_1	98	108.508	0.904	0.4349	8651	6935.01	1.2474	0.0001	Only significant in TCs in accessible promoters
SPIC_2	70	102.804	0.684	0.1754	9757	6580.63	1.4826	0.0001	Only significant in TCs in accessible promoters
SPZ1_2	146	107.577	1.3539	0.1214	8074	6772.22	1.1922	0.0001	Only significant in TCs in accessible promoters
SREBP_known1	85	66.1813	1.2801	0.2414	5247	4254.61	1.2332	0.0001	Only significant in TCs in accessible promoters
SREBP_known2	151	108.404	1.3893	0.1074	7300	6899.54	1.058	0.0614	None significant
SREBP_known3	84	62.9257	1.3297	0.1803	4508	3976.41	1.1337	0.0014	Only significant in TCs in accessible promoters
SREBP_known4	251	158.934	1.5756	0.0285	11945	10179.6	1.1734	0.0001	Only significant in TCs in accessible promoters
SREBP_known5	20	30.1513	0.6741	0.3774	3643	1931.64	1.8855	0.0001	Only significant in TCs in accessible promoters
SREBP_known6	27	33.8922	0.8025	0.3628	3779	2137.14	1.7679	0.0001	Only significant in TCs in accessible promoters
SRF_known1	75	45.8064	1.6237	0.1312	1326	2955.28	0.4489	0.0001	None significant
SRF_known10	51	31.1525	1.6173	0.1575	1035	1903.54	0.544	0.0001	None significant
SRF_known2	56	72.7658	0.7727	0.3334	3877	4625.99	0.8381	0.0015	None significant
SRF_known3	77	65.0838	1.1803	0.3331	2810	4063.28	0.6916	0.0001	None significant
SRF_known4	157	121.453	1.2903	0.2309	7799	7715.71	1.0108	0.4202	None significant
SRF_known5	83	92.2391	0.9009	0.4389	6062	5803.55	1.0445	0.1847	None significant
SRF_known6	104	105.457	0.9863	0.5139	6255	6705.23	0.9329	0.11	None significant
SRF_known7	55	28.7385	1.8831	0.0855	1072	1781.83	0.6019	0.0001	None significant
SRF_known8	33	26.3151	1.2447	0.3021	788	1702.01	0.4633	0.0001	None significant
SRF_known9	36	19.5921	1.7968	0.1763	698	1241.01	0.5628	0.0001	None significant
SRY_2	12	41.0628	0.3091	0.1309	872	2631.95	0.3316	0.0001	None significant
SRY_3	9	21.7137	0.4403	0.2917	305	1415.54	0.216	0.0001	None significant
SRY_4	32	17.3308	1.8002	0.2534	202	1078.48	0.1881	0.0001	None significant
SRY_5	45	33.3241	1.3402	0.3282	262	2105.34	0.1249	0.0001	None significant
SRY_6	25	25.2337	0.9911	0.5368	283	1683.4	0.1686	0.0001	None significant
SRY_7	39	28.4186	1.3597	0.3244	385	1787.91	0.2158	0.0001	None significant
SRY_8	13	35.2609	0.3861	0.2108	516	2176.1	0.2375	0.0001	None significant
STAT_known1	46	40.4634	1.1335	0.3284	2708	2560.55	1.0576	0.1605	None significant
STAT_known10	33	41.7477	0.7954	0.3727	3548	2635.22	1.3462	0.0001	Only significant in TCs in accessible promoters
STAT_known11	175	122.251	1.428	0.054	16033	7804.14	2.0543	0.0001	Only significant in TCs in accessible promoters
STAT_known12	24	26.9781	0.8936	0.5122	1410	1699.52	0.8297	0.0015	None significant
STAT_known13	79	55.3281	1.4203	0.1646	2519	3527.78	0.7141	0.0001	None significant
STAT_known14	262	176.563	1.4812	0.0149	14497	11145.4	1.3007	0.0001	Only significant in TCs in accessible promoters
STAT_known15	222	162.452	1.3643	0.0945	15052	10445.6	1.4409	0.0001	Only significant in TCs in accessible promoters
STAT_known16	219	146.229	1.4943	0.028	10186	9459.95	1.0767	0.0059	None significant
STAT_known17	106	149.47	0.7111	0.1791	11362	9611.2	1.1821	0.0001	Only significant in TCs in accessible promoters
STAT_known2	117	156.373	0.7498	0.2764	23779	9954.04	2.3887	0.0001	Only significant in TCs in accessible promoters
STAT_known3	103	119.229	0.865	0.3824	16948	7610	2.2269	0.0001	Only significant in TCs in accessible promoters
STAT_known4	76	70.788	1.0726	0.4001	4731	4693.59	1.008	0.4279	None significant
STAT_known5	61	58.2801	1.0459	0.3945	3080	3654.02	0.843	0.003	None significant
STAT_known6	73	145.229	0.5061	0.1157	12463	9341.75	1.3341	0.0001	Only significant in TCs in accessible promoters
STAT_known7	79	64.4051	1.2231	0.2451	10234	4052.44	2.525	0.0001	Only significant in TCs in accessible promoters
STAT_known8	73	63.0911	1.1546	0.2876	2944	3924.68	0.7502	0.0001	None significant
STAT_known9	16	32.316	0.5103	0.1972	907	2026.71	0.4478	0.0001	None significant
TAL1_known1	294	211.852	1.3859	0.084	7856	13480.4	0.5828	0.0001	None significant
TAL1_known2	314	252.68	1.2417	0.1527	9814	16073.8	0.6106	0.0001	None significant
TAL1_known3	252	187.139	1.3448	0.1169	7035	12009.7	0.5858	0.0001	None significant
TAL1_known4	372	256.095	1.4508	0.0119	16828	16328	1.0306	0.1228	None significant
TAL1_known5	127	100.216	1.2646	0.2074	2846	6252.1	0.4553	0.0001	None significant
TATA_known1	40	31.9873	1.2429	0.362	906	2050.65	0.4421	0.0001	None significant
TATA_known2	57	31.9275	1.7614	0.1335	2990	2048.41	1.4594	0.0001	Only significant in TCs in accessible promoters
TATA_known3	8	11.0268	0.7483	0.5733	168	667.584	0.2528	0.0001	None significant
TATA_known5	57	32.3095	1.7412	0.139	2975	2079.63	1.4303	0.0001	Only significant in TCs in accessible promoters
TATA_known6	16	26.6257	0.6154	0.4222	309	1627.07	0.1904	0.0001	None significant
TBR1_1	62	49.5002	1.2475	0.2645	1594	3125.17	0.5102	0.0001	None significant
TBR1_2	46	56.3476	0.8196	0.4023	1965	3658.43	0.5372	0.0001	None significant
TBX15_2	64	75.1442	0.8536	0.341	3877	4799.26	0.8079	0.0001	None significant
TBX19_1	100	41.7313	2.3636	0.0489	1570	2755.83	0.5699	0.0001	None significant
TBX1_1	137	128.361	1.0668	0.4077	5329	8273.54	0.6441	0.0001	None significant
TBX1_3	40	44.1054	0.909	0.4967	1732	2802.93	0.6181	0.0001	None significant
TBX1_4	124	112.156	1.1047	0.352	5558	6930.89	0.8019	0.0001	None significant
TBX20_1	84	119.478	0.7055	0.1907	7722	7545.52	1.0234	0.3035	None significant
TBX20_2	128	65.7723	1.9319	0.063	3465	4203.92	0.8243	0.003	None significant
TBX20_3	71	90.8025	0.7843	0.3187	4147	5739.42	0.7226	0.0001	None significant
TBX20_4	55	60.5846	0.9093	0.4871	2615	3938.66	0.664	0.0001	None significant
TBX20_5	64	117.096	0.5504	0.1096	5636	7318.67	0.7701	0.0001	None significant
TBX21_1	32	53.8269	0.6019	0.2863	3807	3275.6	1.1622	0.0059	None significant
TBX21_2	61	50.1601	1.2119	0.2743	1944	3239.76	0.6002	0.0001	None significant
TBX21_3	195	87.3063	2.2195	0.0044	6695	5569	1.2022	0.0001	Only significant in TCs in accessible promoters
TBX21_4	61	62.7722	0.9722	0.4747	2656	4017.29	0.6612	0.0001	None significant
TBX21_5	41	57.8831	0.7133	0.2975	2183	3570.82	0.6115	0.0001	None significant
TBX21_6	133	93.2854	1.4212	0.1699	3608	5920.6	0.6095	0.0001	None significant
TBX2_1	174	97.6323	1.7743	0.0446	8543	6293.35	1.3574	0.0001	Only significant in TCs in accessible promoters
TBX2_2	68	59.5697	1.1392	0.3215	2219	3962.58	0.5601	0.0001	None significant
TBX4_1	56	53.5407	1.0451	0.4779	2604	3440.94	0.7568	0.0001	None significant
TBX4_2	181	84.6216	2.1256	0.0195	5847	5424.25	1.0779	0.1133	None significant
TBX5_1	121	100.32	1.2041	0.2376	4808	6375.71	0.7542	0.0001	None significant
TBX5_2	132	92.2878	1.4257	0.0959	5243	5821.39	0.9007	0.0129	None significant
TBX5_3	73	93.4672	0.7833	0.2605	4080	5869.32	0.6952	0.0001	None significant
TBX5_4	72	74.1935	0.9708	0.5154	3446	4760.76	0.7239	0.0001	None significant
TBX5_5	141	71.5438	1.9574	0.0359	3689	4524.57	0.8154	0.0015	None significant
TCF12_known1	399	258.479	1.5416	0.0014	20071	16227.7	1.2368	0.0001	Only significant in TCs in accessible promoters
TCF21_1	122	105.581	1.154	0.3193	4833	6691.33	0.7223	0.0001	None significant
TCF3_1	825	588.209	1.4019	0.0119	50469	37669.6	1.3398	0.0001	Only significant in TCs in accessible promoters
TCF3_2	299	283.836	1.0532	0.3863	14550	18251.6	0.7972	0.0001	None significant
TCF3_3	390	290.557	1.3411	0.0375	16003	18453.8	0.8672	0.0001	None significant
TCF3_4	512	453.843	1.1279	0.2325	34464	29110.2	1.1839	0.0001	Only significant in TCs in accessible promoters
TCF3_5	245	174.676	1.4003	0.033	9459	11195.8	0.8449	0.0001	None significant
TCF3_6	511	389.973	1.3096	0.0509	25340	24772.6	1.0229	0.1879	None significant
TCF3_7	306	247.626	1.2348	0.124	13428	15670.2	0.8569	0.0001	None significant
TCF4_1	376	258.61	1.4522	0.012	14948	16289	0.9177	0.0001	None significant
TCF4_2	308	221.371	1.3896	0.042	13671	14123.5	0.968	0.1005	None significant
TCF7L1_1	17	66.8382	0.2653	0.06	1752	4376.13	0.4005	0.0001	None significant
TCF7L1_2	60	69.3612	0.867	0.424	2260	4402.09	0.5135	0.0001	None significant
TCF7L2_known1	24	37.5668	0.6482	0.2802	1153	2386.86	0.4833	0.0001	None significant
TCF7L2_known3	33	53.1833	0.6275	0.2321	2003	3347.85	0.5984	0.0001	None significant
TCF7L2_known4	20	56.4699	0.3654	0.0561	2251	3655.2	0.6159	0.0001	None significant
TCF7L2_known5	34	78.233	0.4417	0.1261	2489	4881.89	0.5099	0.0001	None significant
TCF7L2_known6	34	75.8465	0.4555	0.1315	2356	4922.68	0.4787	0.0001	None significant
TCF7L2_known7	60	76.4566	0.7875	0.3521	2297	4857.9	0.4729	0.0001	None significant
TCF7_1	17	74.9163	0.2371	0.052	1923	4801.46	0.4006	0.0001	None significant
TCF7_2	48	63.2257	0.7629	0.3591	1909	4022.13	0.4748	0.0001	None significant
TEAD1_2	87	88.7527	0.9805	0.5102	4226	5629.9	0.7507	0.0001	None significant
TEAD1_3	88	47.788	1.8242	0.0449	1640	3075.92	0.5333	0.0001	None significant
TEAD1_4	70	62.9829	1.1097	0.3622	1723	4091.46	0.4213	0.0001	None significant
TEAD3_1	65	62.7744	1.0349	0.4482	1783	3928.68	0.454	0.0001	None significant
TEAD3_2	33	32.293	1.0212	0.4186	1140	2071.95	0.5504	0.0001	None significant
TEAD4_1	88	48.5626	1.7957	0.054	1622	3119.69	0.5201	0.0001	None significant
TEF_1	36	28.3433	1.2609	0.3811	303	1725.07	0.1761	0.0001	None significant
TEF_2	0	12.6708	0.0731	0.3147	503	799.428	0.6297	0.0001	None significant
TEF_3	35	17.6865	1.9265	0.1665	394	1107.89	0.3562	0.0001	None significant
TFAP2B_1	288	422.375	0.6826	0.0405	44003	27100.5	1.6237	0.0001	Only significant in TCs in accessible promoters
TFAP2B_2	380	439.498	0.8649	0.2145	48047	28007.5	1.7155	0.0001	Only significant in TCs in accessible promoters
TFAP2B_3	330	343.132	0.9618	0.4187	39833	21858.5	1.8223	0.0001	Only significant in TCs in accessible promoters
TFAP2B_4	307	434.526	0.7072	0.0435	47369	27859.5	1.7003	0.0001	Only significant in TCs in accessible promoters
TFAP2E_1	397	501.219	0.7925	0.1168	59633	32059.5	1.86	0.0001	Only significant in TCs in accessible promoters
TFAP2_known10	401	417.675	0.9602	0.4532	45482	26564.3	1.7121	0.0001	Only significant in TCs in accessible promoters
TFAP2_known12	413	439.263	0.9403	0.3636	54858	28013.7	1.9582	0.0001	Only significant in TCs in accessible promoters
TFAP2_known13	334	504.909	0.6622	0.012	58614	31923	1.8361	0.0001	Only significant in TCs in accessible promoters
TFAP2_known14	368	420.777	0.8749	0.2501	45124	26627.6	1.6946	0.0001	Only significant in TCs in accessible promoters
TFAP2_known15	303	289.666	1.0459	0.3934	33946	18799.1	1.8057	0.0001	Only significant in TCs in accessible promoters
TFAP2_known16	294	442.515	0.6651	0.012	50423	28386	1.7763	0.0001	Only significant in TCs in accessible promoters
TFAP2_known18	280	430.719	0.6509	0.0225	51718	27532.1	1.8784	0.0001	Only significant in TCs in accessible promoters
TFAP2_known19	531	436.973	1.2147	0.0986	51600	27603.8	1.8693	0.0001	Only significant in TCs in accessible promoters
TFAP2_known21	426	510.827	0.8343	0.1206	69545	32498.1	2.1399	0.0001	Only significant in TCs in accessible promoters
TFAP2_known22	280	467.945	0.5992	0.006	52043	29831.9	1.7445	0.0001	Only significant in TCs in accessible promoters
TFAP2_known6	526	641.123	0.8207	0.1275	74559	40926.9	1.8217	0.0001	Only significant in TCs in accessible promoters
TFAP2_known7	273	293.734	0.9297	0.398	39492	18961.3	2.0827	0.0001	Only significant in TCs in accessible promoters
TFAP2_known9	416	452.935	0.9186	0.3432	52523	29183.1	1.7997	0.0001	Only significant in TCs in accessible promoters
TFAP4_1	577	518.694	1.1122	0.2676	47948	33518.8	1.4305	0.0001	Only significant in TCs in accessible promoters
TFAP4_2	325	225.633	1.4384	0.0196	17997	14444.3	1.2459	0.0001	Only significant in TCs in accessible promoters
TFAP4_3	345	238.43	1.4451	0.0217	22180	15266.8	1.4528	0.0001	Only significant in TCs in accessible promoters
TFAP4_4	336	258.636	1.298	0.0514	20135	16549.3	1.2167	0.0001	Only significant in TCs in accessible promoters
TFAP4_5	103	96.3011	1.0688	0.3988	4009	6023.63	0.6656	0.0001	None significant
TFAP4_6	113	100.521	1.1229	0.3248	4393	6464.63	0.6796	0.0001	None significant
TFCP2L1_1	478	414.983	1.1515	0.2176	41613	26528.6	1.5686	0.0001	Only significant in TCs in accessible promoters
TFCP2_1	140	209.471	0.6699	0.075	17288	13305.7	1.2993	0.0001	Only significant in TCs in accessible promoters
TFCP2_2	232	123.954	1.8647	0.0029	7803	7874.61	0.9909	0.3773	None significant
TFCP2_3	507	544.343	0.9315	0.3571	54211	34472.3	1.5726	0.0001	Only significant in TCs in accessible promoters
TFCP2_4	39	16.6511	2.2661	0.0702	1557	1096.78	1.4192	0.0001	Only significant in TCs in accessible promoters
TFCP2_5	25	60.2324	0.4246	0.1171	7041	3930.41	1.7912	0.0001	Only significant in TCs in accessible promoters
TFE3_1	86	56.6273	1.5097	0.105	6151	3619.6	1.6992	0.0001	Only significant in TCs in accessible promoters
TFEB_1	88	59.0058	1.4832	0.113	4775	3830.99	1.2464	0.0001	Only significant in TCs in accessible promoters
TFEC_1	83	56.7991	1.4533	0.1299	4499	3568.13	1.2608	0.0001	Only significant in TCs in accessible promoters
TFE_1	62	43.7764	1.407	0.1539	2523	2719.4	0.9278	0.0951	None significant
TGIF1_1	109	79.2078	1.3714	0.1665	2424	5056.78	0.4795	0.0001	None significant
TGIF1_2	207	149.413	1.3829	0.1184	7886	9648.46	0.8174	0.0001	None significant
TGIF1_3	112	67.6955	1.6449	0.0528	1536	4228.91	0.3634	0.0001	None significant
TGIF2LX_1	124	69.092	1.7834	0.045	2073	4429.17	0.4682	0.0001	None significant
TGIF2_1	119	104.225	1.1404	0.3491	4092	6567.14	0.6232	0.0001	None significant
TGIF2_2	112	69.2404	1.6088	0.0849	2479	4505.51	0.5503	0.0001	None significant
THRA_1	108	99.9099	1.0802	0.3974	5868	6317.06	0.9289	0.0909	None significant
THRB_1	126	114.433	1.1002	0.3814	6912	7194	0.9608	0.2172	None significant
THRB_2	94	118.53	0.7948	0.3226	7669	7432.06	1.0319	0.2621	None significant
THRB_3	61	120.471	0.5104	0.1258	7597	7842.16	0.9687	0.2423	None significant
TLX2_1	72	40.0402	1.7787	0.0555	4284	2626.2	1.631	0.0001	Only significant in TCs in accessible promoters
TLX2_2	58	37.5042	1.5323	0.201	314	2386.18	0.132	0.0001	None significant
TP53_2	100	78.9715	1.2629	0.2392	4173	5074.58	0.8224	0.0001	None significant
TP53_3	131	96.0066	1.3607	0.1355	5920	6219.79	0.9518	0.0995	None significant
TP53_4	146	195.131	0.7495	0.2236	12540	12431	1.0088	0.4256	None significant
TP53_5	80	120.859	0.6647	0.183	4633	7558.94	0.613	0.0001	None significant
TP53_6	252	80.2061	3.1155	0.0001	2933	5097.93	0.5754	0.0001	Only significant in TCs in accessible enhancers
TP53_7	61	78.3343	0.7815	0.35	4444	5062.99	0.8778	0.0135	None significant
TP63_1	60	43.5524	1.3692	0.252	2212	2771.64	0.7982	0.0075	None significant
TP73_1	96	73.8804	1.2954	0.2732	5144	4856.46	1.0592	0.1583	None significant
T_1	200	89.6493	2.2173	0.0104	2959	5760.38	0.5138	0.0001	None significant
T_2	56	47.5544	1.1739	0.291	1620	3039.03	0.5332	0.0001	None significant
T_3	74	40.1894	1.8209	0.097	1519	2562.22	0.593	0.0001	None significant
UNCX_1	33	22.0543	1.4748	0.3143	243	1435.21	0.1699	0.0001	None significant
UNCX_2	39	22.5878	1.6958	0.2192	249	1362.23	0.1834	0.0001	None significant
UNCX_3	16	11.5054	1.3594	0.3909	296	696.485	0.4258	0.0001	None significant
UNCX_4	39	20.3471	1.8738	0.1808	170	1278.94	0.1336	0.0001	None significant
UNCX_5	8	11.7578	0.7055	0.5353	161	742.522	0.2179	0.0001	None significant
VAX1_1	80	32.6187	2.4094	0.0405	689	2098.4	0.3287	0.0001	None significant
VAX1_2	24	14.8859	1.5737	0.2469	203	954.091	0.2136	0.0001	None significant
VAX2_1	34	27.697	1.2196	0.3194	583	1702.26	0.3429	0.0001	None significant
VAX2_2	24	14.7867	1.5836	0.2546	203	945.802	0.2155	0.0001	None significant
VDR_2	144	148.633	0.969	0.4777	12902	9505.36	1.3573	0.0001	Only significant in TCs in accessible promoters
VDR_3	420	436.836	0.9615	0.4563	41049	27992.8	1.4664	0.0001	Only significant in TCs in accessible promoters
VDR_4	61	71.8388	0.8512	0.4286	4968	4700.73	1.0568	0.1506	None significant
VDR_5	205	102.093	1.9982	0.0089	6610	6430.86	1.0279	0.3001	None significant
VDR_6	196	115.106	1.6967	0.045	8585	7151.62	1.2004	0.0001	Only significant in TCs in accessible promoters
VENTX_1	18	12.8137	1.3754	0.3903	328	817.287	0.4021	0.0001	None significant
VENTX_2	105	26.543	3.8485	0.006	606	1751.75	0.3463	0.0001	None significant
VSX1_1	0	26.8095	0.036	0.1794	375	1652.98	0.2273	0.0001	None significant
VSX1_2	0	11.5885	0.0794	0.2196	123	712.634	0.1738	0.0001	None significant
VSX1_3	79	34.3674	2.262	0.0315	2109	2107.52	1.0007	0.5039	None significant
VSX1_4	24	14.4163	1.6217	0.2521	429	901.322	0.4765	0.0001	None significant
VSX2_1	14	23.9966	0.6001	0.4069	531	1462.17	0.3636	0.0001	None significant
VSX2_2	0	11.1771	0.0821	0.2039	123	709.399	0.1745	0.0001	None significant
XBP1_1	85	45.8357	1.8362	0.1006	5181	2880.9	1.7981	0.0001	Only significant in TCs in accessible promoters
XBP1_2	87	47.0905	1.8299	0.128	4650	2985.54	1.5573	0.0001	Only significant in TCs in accessible promoters
XBP1_3	72	36.2956	1.9573	0.0659	6215	2375.74	2.6153	0.0001	Only significant in TCs in accessible promoters
XBP1_4	137	57.3283	2.3659	0.0075	8047	3628.02	2.2177	0.0001	Only significant in TCs in accessible promoters
YY1_known1	127	96.8384	1.3083	0.2033	11335	6181.98	1.8334	0.0001	Only significant in TCs in accessible promoters
YY1_known2	277	300.751	0.9213	0.39	34808	19167.6	1.8159	0.0001	Only significant in TCs in accessible promoters
YY1_known3	81	80.7804	1.0027	0.4907	13886	5382.39	2.5796	0.0001	Only significant in TCs in accessible promoters
YY1_known4	63	80.2838	0.7874	0.2995	9635	5228.32	1.8427	0.0001	Only significant in TCs in accessible promoters
YY1_known5	77	83.251	0.9258	0.4811	13037	5373.66	2.4258	0.0001	Only significant in TCs in accessible promoters
YY1_known7	33	59.5105	0.5619	0.1775	14500	3814.37	3.8007	0.0001	Only significant in TCs in accessible promoters
YY2_1	28	45.9241	0.618	0.1964	12316	2926.97	4.2067	0.0001	Only significant in TCs in accessible promoters
YY2_2	66	94.6812	0.7002	0.1911	17859	6063.39	2.9451	0.0001	Only significant in TCs in accessible promoters
ZBED1_1	13	8.8272	1.4246	0.4583	1679	565.114	2.9676	0.0001	Only significant in TCs in accessible promoters
ZBTB12_1	37	68.2183	0.549	0.2026	4118	4246.86	0.9697	0.3335	None significant
ZBTB14_1	104	290.797	0.3598	0.0001	47896	18739.7	2.5558	0.0001	Only significant in TCs in accessible promoters
ZBTB14_2	163	394.087	0.4151	0.0001	63629	25128.9	2.532	0.0001	Only significant in TCs in accessible promoters
ZBTB14_3	69	340.83	0.2048	0.0001	60147	21597.4	2.7848	0.0001	Only significant in TCs in accessible promoters
ZBTB16_1	29	76.8823	0.3852	0.182	1502	5151.94	0.2917	0.0001	None significant
ZBTB18_1	123	114.439	1.0742	0.3726	3912	7170.93	0.5456	0.0001	None significant
ZBTB18_2	148	126.066	1.1726	0.2788	4054	8087.32	0.5013	0.0001	None significant
ZBTB18_3	172	141.63	1.2129	0.2391	4745	9272.55	0.5118	0.0001	None significant
ZBTB33_known1	201	137.125	1.4624	0.0479	8364	8790.78	0.9515	0.069	None significant
ZBTB3_1	395	374.449	1.0547	0.3626	32522	23993.1	1.3555	0.0001	Only significant in TCs in accessible promoters
ZBTB49_1	204	167.988	1.2131	0.2376	18863	10616	1.7768	0.0001	Only significant in TCs in accessible promoters
ZBTB6_1	271	204.736	1.3221	0.1049	22197	12881.3	1.7231	0.0001	Only significant in TCs in accessible promoters
ZBTB7A_known1	147	288.18	0.5118	0.0001	30117	18223.3	1.6526	0.0001	Only significant in TCs in accessible promoters
ZBTB7A_known2	178	185.344	0.9606	0.4398	16687	11841.8	1.4091	0.0001	Only significant in TCs in accessible promoters
ZBTB7A_known3	142	234.284	0.6078	0.0347	30786	14847.7	2.0734	0.0001	Only significant in TCs in accessible promoters
ZBTB7A_known4	160	183.721	0.8716	0.3339	21275	11717.9	1.8155	0.0001	Only significant in TCs in accessible promoters
ZBTB7C_1	200	252.038	0.7943	0.1862	29159	15876.7	1.8365	0.0001	Only significant in TCs in accessible promoters
ZEB1_known1	221	136.244	1.6176	0.0359	9405	8788.33	1.0702	0.0345	None significant
ZEB1_known2	246	135.175	1.8138	0.0045	6889	8699.48	0.7919	0.0001	None significant
ZEB1_known3	266	208.147	1.2766	0.1215	13049	13433.5	0.9714	0.1665	None significant
ZEB1_known4	27	47.5373	0.5769	0.1815	4008	3042.43	1.3173	0.0001	Only significant in TCs in accessible promoters
ZIC1_1	121	148.087	0.8183	0.251	15215	9490.92	1.603	0.0001	Only significant in TCs in accessible promoters
ZIC1_3	494	573.223	0.862	0.2064	64996	36733.3	1.7694	0.0001	Only significant in TCs in accessible promoters
ZIC2_1	238	205.614	1.1567	0.2451	19818	12956	1.5296	0.0001	Only significant in TCs in accessible promoters
ZIC3_1	142	187.127	0.7601	0.1245	16587	11864.4	1.398	0.0001	Only significant in TCs in accessible promoters
ZIC3_3	477	680.971	0.7009	0.024	81403	43721.7	1.8618	0.0001	Only significant in TCs in accessible promoters
ZIC3_4	536	688.288	0.7791	0.0465	77760	43473.3	1.7887	0.0001	Only significant in TCs in accessible promoters
ZIC4_1	536	707.311	0.7581	0.0499	81751	45369.8	1.8019	0.0001	Only significant in TCs in accessible promoters
ZKSCAN3_1	84	108.986	0.7728	0.2788	9373	6911.72	1.3561	0.0001	Only significant in TCs in accessible promoters
ZNF143_known1	633	603.888	1.0481	0.4012	57726	38598.2	1.4955	0.0001	Only significant in TCs in accessible promoters
ZNF143_known2	125	123.051	1.0157	0.4473	9538	8015.84	1.1899	0.0001	Only significant in TCs in accessible promoters
ZNF232_1	53	44.8688	1.1773	0.3961	799	2780.21	0.2876	0.0001	None significant
ZNF282_1	207	161.282	1.2817	0.1976	11828	10119.4	1.1688	0.0001	Only significant in TCs in accessible promoters
ZNF350_1	243	266.519	0.9121	0.3483	21835	16885.6	1.2931	0.0001	Only significant in TCs in accessible promoters
ZNF35_1	74	91.42	0.8115	0.3594	2457	5802.88	0.4235	0.0001	None significant
ZNF384_1	54	38.4638	1.3937	0.2366	1719	2447.4	0.7025	0.0001	None significant
ZNF410_1	190	149.745	1.267	0.1975	7382	9507.34	0.7765	0.0001	None significant
ZNF410_2	47	40.6993	1.1511	0.4069	1352	2754.85	0.491	0.0001	None significant
ZNF423_1	224	136.005	1.6423	0.0315	9672	8705.19	1.111	0.0014	Only significant in TCs in accessible promoters
ZNF423_2	262	268.587	0.9756	0.4747	20503	17257.1	1.1881	0.0001	Only significant in TCs in accessible promoters
ZNF524_1	156	177.693	0.8786	0.3245	17877	11227.8	1.5922	0.0001	Only significant in TCs in accessible promoters
ZNF524_2	152	167.496	0.908	0.3941	20833	10509.3	1.9822	0.0001	Only significant in TCs in accessible promoters
ZNF589_1	409	311.3	1.3128	0.0831	30758	19868.6	1.548	0.0001	Only significant in TCs in accessible promoters
ZNF628_1	97	67.8888	1.4226	0.18	3530	4387.19	0.8047	0.0001	None significant
ZNF652_1	8	40.5499	0.2166	0.0375	1286	2495.05	0.5156	0.0001	None significant
ZNF691_1	241	225.115	1.0703	0.3897	13692	14053.7	0.9743	0.2398	None significant
ZNF713_1	109	80.2133	1.3545	0.1993	3368	5076.05	0.6636	0.0001	None significant
ZNF75A_1	152	144.331	1.0528	0.4346	8673	9103.65	0.9527	0.0989	None significant
ZNF784_1	50	54.9634	0.9113	0.5015	4784	3503.36	1.3654	0.0001	Only significant in TCs in accessible promoters
ZNF8_1	6	35.4452	0.1921	0.1086	4893	2186.44	2.2373	0.0001	Only significant in TCs in accessible promoters
ZSCAN16_1	185	92.8694	1.9815	0.0104	2854	5878.12	0.4856	0.0001	None significant
ZSCAN26_1	42	25.3218	1.6336	0.2209	182	1581.77	0.1156	0.0001	None significant
ZSCAN4_1	83	100.469	0.8278	0.3339	4053	6464.06	0.6271	0.0001	None significant
ZSCAN4_2	88	101.223	0.8706	0.4206	3142	6444.72	0.4876	0.0001	None significant
ZSCAN4_3	252	162.025	1.5519	0.045	7415	10426.9	0.7112	0.0001	None significant

## Sheet: Info
footprint	Name of the TF footprint motif
observed_transcribed-accessible-enhancer	Observed footprint motif occurrences in TCs in ATAC-seq peaks in enhancer states
expected_transcribed-accessible-enhancer	Expected footprint motif occurrences in TCs in ATAC-seq peaks in enhancer states
fold_transcribed-accessible-enhancer	Fold enrichment (Observed/Expected) footprint motif occurrences in TCs in ATAC-seq peaks in enhancer states
pvalue_transcribed-accessible-enhancer	P value
observed_transcribed-accessible-promoter	Observed footprint motif occurrences in TCs in ATAC-seq peaks in promoter states
expected_transcribed-accessible-promoter	Expected footprint motif occurrences in TCs in ATAC-seq peaks in promoter states
fold_transcribed-accessible-promoter	Fold enrichment (Observed/Expected) footprint motif occurrences in TCs in ATAC-seq peaks in promoter states
pvalue_transcribed-accessible-promoter	P value
significance	Significance after Benjamini-Yekutieli FDR correction
enhancer states = Active/Weak/Genic enhancer chromatin states
promoter states = Active/Weak/flanking TSS chromatin states
